# Supplementary material for: Assessing the ecotoxicity of multicomponent nanomaterials using a classification SAR approach
Source: Royal Society of Chemistry journal article supplement (doi:10.1039/d4en01183j), 2025-01-01
Supplement: d4en01183j1.xlsx [file d4en01183j1.xlsx]

## Sheet: Sheet1
MCNM	Information	Molar weight (g/mol)	Size (nm)	Exposure time	Assay	Endpoint	Value (mg/l	Value(mol/L)	Cell type	Cell group	Log(endpoint)	reference	Notes
ZnO/Ag-NM	ZnO decorated w Ag Np on surface. Ag content 1-3 %	81.81	-	48 h	Immobilization test	LC50	0.59	7.21183e-06	Daphnia magna	Crustacean	-5.14195	Azevedo et al., Science of the Total Environment 579 (2017) 337–344	If the MCNM composition is not noted in the MCNM or information tab, composition is based on the stoichiometry
ZnO/Ag-NM	ZnO decorated w Ag Np on surface. Ag content 1-3 %	81.81	-	21 days	Reproduction test	LC50	0.2	2.44469e-06	Daphnia magna	Crustacean	-5.61178	Azevedo et al., Science of the Total Environment 579 (2017) 337–344	If the MCNM composition is not noted in the MCNM or information tab, composition is based on the stoichiometry
Au/TiO2	Au doped TiO2 on surface (0.66% Au)	80.7722	48	48 h	DAPHTOXKIT	LC50	43	0.000532361	Daphnia magna	Crustacean	-3.27379	Jastrzezbska et al., Int. J. Appl. Ceram. Technol., 1–17 (2014)	If the MCNM composition is not noted in the MCNM or information tab, composition is based on the stoichiometry
Ag2O/TiO2	Ag2O doped TiO2 on surface (0.85% Ag2O)	81.292	64	48 h	DAPHTOXKIT	LC50	0.49	6.02765e-06	Daphnia magna	Crustacean	-5.21985	Jastrzezbska et al., Int. J. Appl. Ceram. Technol., 1–17 (2014)	If the MCNM composition is not noted in the MCNM or information tab, composition is based on the stoichiometry
PdO/TiO2	PdO doped TiO2 on surface (0.66% PdO)	80.2772	43	48 h	DAPHTOXKIT	LC50	20.84	0.0002596	Daphnia magna	Crustacean	-3.58569	Jastrzezbska et al., Int. J. Appl. Ceram. Technol., 1–17 (2014)	If the MCNM composition is not noted in the MCNM or information tab, composition is based on the stoichiometry
TiO2/SiO2	Nanocomposite:33%SiO2	73.4	46	48 h	DAPHTOXKIT	LC50	>1000	>0.0136239782016349	Daphnia magna	Crustacean	-	Jastrzezbska et al., Int. J. Appl. Ceram. Technol., 1–17 (2014)	If the MCNM composition is not noted in the MCNM or information tab, composition is based on the stoichiometry
Au/TiO2	Au doped TiO2 on surface (0.66% Au)	80.7722	48	72 h	Seed germination	LC50	>1000	>0.0123804972502916	Sorghum saccharatum	Plants	-	Jastrzezbska et al., Int. J. Appl. Ceram. Technol., 1–17 (2014)	If the MCNM composition is not noted in the MCNM or information tab, composition is based on the stoichiometry
Ag2O/TiO2	Au doped TiO2 on surface (0.85% Ag2O)	81.292	64	72 h	Seed germination	LC50	>1000	>0.0123013334645476	Sorghum saccharatum	Plants	-	Jastrzezbska et al., Int. J. Appl. Ceram. Technol., 1–17 (2014)	If the MCNM composition is not noted in the MCNM or information tab, composition is based on the stoichiometry
PdO/TiO2	Au doped TiO2 on surface (0.66% PdO)	80.2772	43	72 h	Seed germination	LC50	>1000	>0.0124568370595885	Sorghum saccharatum	Plants	-	Jastrzezbska et al., Int. J. Appl. Ceram. Technol., 1–17 (2014)	If the MCNM composition is not noted in the MCNM or information tab, composition is based on the stoichiometry
TiO2/SiO2	Nanocomposite:33%SiO2	73.4	46	72 h	Seed germination	LC50	>1000	>0.0136239782016349	Sorghum saccharatum	Plants	-	Jastrzezbska et al., Int. J. Appl. Ceram. Technol., 1–17 (2014)	If the MCNM composition is not noted in the MCNM or information tab, composition is based on the stoichiometry
Au/TiO2	Au doped TiO2 on surface (0.66% Au)	80.7722	48	72 h	Root elongation	LC50	>1000	>0.0123804972502916	Sorghum saccharatum	Plants	-	Jastrzezbska et al., Int. J. Appl. Ceram. Technol., 1–17 (2014)	If the MCNM composition is not noted in the MCNM or information tab, composition is based on the stoichiometry
Ag2O/TiO2	Au doped TiO2 on surface (0.85% Ag2O)	81.292	64	72 h	Root elongation	LC50	>1000	>0.0123013334645476	Sorghum saccharatum	Plants	-	Jastrzezbska et al., Int. J. Appl. Ceram. Technol., 1–17 (2014)	If the MCNM composition is not noted in the MCNM or information tab, composition is based on the stoichiometry
PdO/TiO2	Au doped TiO2 on surface (0.66% PdO)	80.2772	43	72 h	Root elongation	LC50	>1000	>0.0124568370595885	Sorghum saccharatum	Plants	-	Jastrzezbska et al., Int. J. Appl. Ceram. Technol., 1–17 (2014)	If the MCNM composition is not noted in the MCNM or information tab, composition is based on the stoichiometry
TiO2/SiO2	Nanocomposite:33%SiO2	73.4	46	72 h	Root elongation	LC50	>1000	>0.0136239782016349	Sorghum saccharatum	Plants	-	Jastrzezbska et al., Int. J. Appl. Ceram. Technol., 1–17 (2014)	If the MCNM composition is not noted in the MCNM or information tab, composition is based on the stoichiometry
Au/TiO2	Au doped TiO2 on surface (0.66% Au)	80.7722	48	72 h	Seed germination	LC50	>1000	>0.0123804972502916	Lepidium sativum	Plants	-	Jastrzezbska et al., Int. J. Appl. Ceram. Technol., 1–17 (2014)	If the MCNM composition is not noted in the MCNM or information tab, composition is based on the stoichiometry
Ag2O/TiO2	Au doped TiO2 on surface (0.85% Ag2O)	81.292	64	72 h	Seed germination	LC50	>1000	>0.0123013334645476	Lepidium sativum	Plants	-	Jastrzezbska et al., Int. J. Appl. Ceram. Technol., 1–17 (2014)	If the MCNM composition is not noted in the MCNM or information tab, composition is based on the stoichiometry
PdO/TiO2	Au doped TiO2 on surface (0.66% PdO)	80.2772	43	72 h	Seed germination	LC50	>1000	>0.0124568370595885	Lepidium sativum	Plants	-	Jastrzezbska et al., Int. J. Appl. Ceram. Technol., 1–17 (2014)	If the MCNM composition is not noted in the MCNM or information tab, composition is based on the stoichiometry
TiO2/SiO2	Nanocomposite:33%SiO2	73.4	46	72 h	Seed germination	LC50	>1000	>0.0136239782016349	Lepidium sativum	Plants	-	Jastrzezbska et al., Int. J. Appl. Ceram. Technol., 1–17 (2014)	If the MCNM composition is not noted in the MCNM or information tab, composition is based on the stoichiometry
Au/TiO2	Au doped TiO2 on surface (0.66% Au)	80.7722	48	72 h	Root elongation	LC50	>1000	>0.0123804972502916	Lepidium sativum	Plants	-	Jastrzezbska et al., Int. J. Appl. Ceram. Technol., 1–17 (2014)	If the MCNM composition is not noted in the MCNM or information tab, composition is based on the stoichiometry
Ag2O/TiO2	Au doped TiO2 on surface (0.85% Ag2O)	81.292	64	72 h	Root elongation	LC50	>1000	>0.0123013334645476	Lepidium sativum	Plants	-	Jastrzezbska et al., Int. J. Appl. Ceram. Technol., 1–17 (2014)	If the MCNM composition is not noted in the MCNM or information tab, composition is based on the stoichiometry
PdO/TiO2	Au doped TiO2 on surface (0.66% PdO)	80.2772	43	72 h	Root elongation	LC50	>1000	>0.0124568370595885	Lepidium sativum	Plants	-	Jastrzezbska et al., Int. J. Appl. Ceram. Technol., 1–17 (2014)	If the MCNM composition is not noted in the MCNM or information tab, composition is based on the stoichiometry
TiO2/SiO2	Nanocomposite:33%SiO2	73.4	46	72 h	Root elongation	LC50	>1000	>0.0136239782016349	Lepidium sativum	Plants	-	Jastrzezbska et al., Int. J. Appl. Ceram. Technol., 1–17 (2014)	If the MCNM composition is not noted in the MCNM or information tab, composition is based on the stoichiometry
Y:ZnO	Y doped ZnO (2%)	81.16	-	1 h	Plate count	EC50	100	0.00123213	E. Coli	Bacteria	-2.90934	Sharma et al. / Materials Science and Engineering C 53 (2015) 104–110	If the MCNM composition is not noted in the MCNM or information tab, composition is based on the stoichiometry
Y:ZnO	Y doped ZnO (4%)	81.32	-	1 h	Plate count	EC50	100	0.00122971	E. Coli	Bacteria	-2.9102	Sharma et al. / Materials Science and Engineering C 53 (2015) 104–110	If the MCNM composition is not noted in the MCNM or information tab, composition is based on the stoichiometry
Y:ZnO	Y doped ZnO (2%)	81.16	-	2 h	Plate count	EC50	100	0.00123213	E. Coli	Bacteria	-2.90934	Sharma et al. / Materials Science and Engineering C 53 (2015) 104–110	If the MCNM composition is not noted in the MCNM or information tab, composition is based on the stoichiometry
Y:ZnO	Y doped ZnO (4%)	81.32	-	2 h	Plate count	EC50	100	0.00122971	E. Coli	Bacteria	-2.9102	Sharma et al. / Materials Science and Engineering C 53 (2015) 104–110	If the MCNM composition is not noted in the MCNM or information tab, composition is based on the stoichiometry
Y:ZnO	Y doped ZnO (2%)	81.16	-	3 h	Plate count	EC50	100	0.00123213	E. Coli	Bacteria	-2.90934	Sharma et al. / Materials Science and Engineering C 53 (2015) 104–110	If the MCNM composition is not noted in the MCNM or information tab, composition is based on the stoichiometry
Y:ZnO	Y doped ZnO (4%)	81.32	-	3 h	Plate count	EC50	100	0.00122971	E. Coli	Bacteria	-2.9102	Sharma et al. / Materials Science and Engineering C 53 (2015) 104–110	If the MCNM composition is not noted in the MCNM or information tab, composition is based on the stoichiometry
Y:ZnO	Y doped ZnO (2%)	81.16	-	4 h	Plate count	EC50	100	0.00123213	E. Coli	Bacteria	-2.90934	Sharma et al. / Materials Science and Engineering C 53 (2015) 104–110	If the MCNM composition is not noted in the MCNM or information tab, composition is based on the stoichiometry
Y:ZnO	Y doped ZnO (4%)	81.32	-	4 h	Plate count	EC50	100	0.00122971	E. Coli	Bacteria	-2.9102	Sharma et al. / Materials Science and Engineering C 53 (2015) 104–110	If the MCNM composition is not noted in the MCNM or information tab, composition is based on the stoichiometry
Y:ZnO	Y doped ZnO (2%)	81.16	-	2 h	Plate count	EC50	100	0.00123213	S. aureus	Bacteria	-2.90934	Sharma et al. / Materials Science and Engineering C 53 (2015) 104–110	If the MCNM composition is not noted in the MCNM or information tab, composition is based on the stoichiometry
Y:ZnO	Y doped ZnO (4%)	81.32	-	2 h	Plate count	EC50	100	0.00122971	S. aureus	Bacteria	-2.9102	Sharma et al. / Materials Science and Engineering C 53 (2015) 104–110	If the MCNM composition is not noted in the MCNM or information tab, composition is based on the stoichiometry
Y:ZnO	Y doped ZnO (2%)	81.16	-	4 h	Plate count	EC50	100	0.00123213	S. aureus	Bacteria	-2.90934	Sharma et al. / Materials Science and Engineering C 53 (2015) 104–110	If the MCNM composition is not noted in the MCNM or information tab, composition is based on the stoichiometry
Y:ZnO	Y doped ZnO (4%)	81.32	-	4 h	Plate count	EC50	100	0.00122971	S. aureus	Bacteria	-2.9102	Sharma et al. / Materials Science and Engineering C 53 (2015) 104–110	If the MCNM composition is not noted in the MCNM or information tab, composition is based on the stoichiometry
Y:ZnO	Y doped ZnO (2%)	81.16	-	6 h	Plate count	EC50	100	0.00123213	S. aureus	Bacteria	-2.90934	Sharma et al. / Materials Science and Engineering C 53 (2015) 104–110	If the MCNM composition is not noted in the MCNM or information tab, composition is based on the stoichiometry
Y:ZnO	Y doped ZnO (4%)	81.32	-	6 h	Plate count	EC50	100	0.00122971	S. aureus	Bacteria	-2.9102	Sharma et al. / Materials Science and Engineering C 53 (2015) 104–110	If the MCNM composition is not noted in the MCNM or information tab, composition is based on the stoichiometry
Y:ZnO	Y doped ZnO (2%)	81.16	-	7 h	Plate count	EC50	100	0.00123213	S. aureus	Bacteria	-2.90934	Sharma et al. / Materials Science and Engineering C 53 (2015) 104–110	If the MCNM composition is not noted in the MCNM or information tab, composition is based on the stoichiometry
Y:ZnO	Y doped ZnO (4%)	81.32	-	7 h	Plate count	EC50	100	0.00122971	S. aureus	Bacteria	-2.9102	Sharma et al. / Materials Science and Engineering C 53 (2015) 104–110	If the MCNM composition is not noted in the MCNM or information tab, composition is based on the stoichiometry
CuO-MgO-ZnO	Nanocomposite equimolar	64.68	--	24 h	growth inhibition assay	IC50	62.5	0.000966296	S.aureus	Bacteria	-3.01489	Dias et al., Research Discover Materials (2023) 3:27	If the MCNM composition is not noted in the MCNM or information tab, composition is based on the stoichiometry
CuO-MgO-ZnO	Nanocomposite equimolar	64.68	--	24 h	growth inhibition assay	IC50	125	0.00193259	S.aureus	Bacteria	-2.71386	Dias et al., Research Discover Materials (2023) 3:27	If the MCNM composition is not noted in the MCNM or information tab, composition is based on the stoichiometry
CuO-Co3O4-CeO2	Nanocomposite equimolar	161.04	--	24 h	growth inhibition assay	IC50	125	0.000776205	S.aureus	Bacteria	-3.11002	Dias et al., Research Discover Materials (2023) 3:27	If the MCNM composition is not noted in the MCNM or information tab, composition is based on the stoichiometry
CuO-Co3O4-CeO2	Nanocomposite equimolar	161.04	--	24 h	growth inhibition assay	IC50	125	0.000776205	S.aureus	Bacteria	-3.11002	Dias et al., Research Discover Materials (2023) 3:27	If the MCNM composition is not noted in the MCNM or information tab, composition is based on the stoichiometry
CuO-MgO-ZnO	Nanocomposite equimolar	64.68	--	24 h	growth inhibition assay	IC50	62.5	0.000966296	Candida parapsilosis	Eukaryotes	-3.01489	Dias et al., Research Discover Materials (2023) 3:27	If the MCNM composition is not noted in the MCNM or information tab, composition is based on the stoichiometry
CuO-MgO-ZnO	Nanocomposite equimolar	64.68	--	24 h	growth inhibition assay	IC50	125	0.00193259	Candida parapsilosis	Eukaryotes	-2.71386	Dias et al., Research Discover Materials (2023) 3:27	If the MCNM composition is not noted in the MCNM or information tab, composition is based on the stoichiometry
CuO-Co3O4-CeO2	Nanocomposite equimolar	161.04	--	24 h	growth inhibition assay	IC50	62.5	0.000388102	Candida parapsilosis	Eukaryotes	-3.41105	Dias et al., Research Discover Materials (2023) 3:27	If the MCNM composition is not noted in the MCNM or information tab, composition is based on the stoichiometry
CuO-Co3O4-CeO2	Nanocomposite equimolar	161.04	--	24 h	growth inhibition assay	IC50	125	0.000776205	Candida parapsilosis	Eukaryotes	-3.11002	Dias et al., Research Discover Materials (2023) 3:27	If the MCNM composition is not noted in the MCNM or information tab, composition is based on the stoichiometry
CuO-MgO-ZnO	Nanocomposite equimolar	64.68	--	24 h	growth inhibition assay	IC50	62.5	0.000966296	Candida albicans	Eukaryotes	-3.01489	Dias et al., Research Discover Materials (2023) 3:27	If the MCNM composition is not noted in the MCNM or information tab, composition is based on the stoichiometry
CuO-MgO-ZnO	Nanocomposite equimolar	64.68	--	24 h	growth inhibition assay	IC50	125	0.00193259	Candida albicans	Eukaryotes	-2.71386	Dias et al., Research Discover Materials (2023) 3:27	If the MCNM composition is not noted in the MCNM or information tab, composition is based on the stoichiometry
CuO-Co3O4-CeO2	Nanocomposite equimolar	161.04	--	24 h	growth inhibition assay	IC50	125	0.000776205	Candida albicans	Eukaryotes	-3.11002	Dias et al., Research Discover Materials (2023) 3:27	If the MCNM composition is not noted in the MCNM or information tab, composition is based on the stoichiometry
CuO-Co3O4-CeO2	Nanocomposite equimolar	161.04	--	24 h	growth inhibition assay	IC50	250	0.00155241	Candida albicans	Eukaryotes	-2.80899	Dias et al., Research Discover Materials (2023) 3:27	If the MCNM composition is not noted in the MCNM or information tab, composition is based on the stoichiometry
CuO–CeO2	CuO doped CeO2 (10%)	162.75	9.1	24 h	Immobilization	EC50	>200	>0.00122887864823349	Daphnia magna	Crustacean	-	A. Jemec et al. / Journal of Hazardous Materials 219–220 (2012) 213–220	If the MCNM composition is not noted in the MCNM or information tab, composition is based on the stoichiometry
CuO–CeO2	CuO doped CeO2 (15%)	158.125	8.4	24 h	Immobilization	EC50	>200	>0.00126482213438735	Daphnia magna	Crustacean	-	A. Jemec et al. / Journal of Hazardous Materials 219–220 (2012) 213–220	If the MCNM composition is not noted in the MCNM or information tab, composition is based on the stoichiometry
CuO–CeO2	CuO doped CeO2 (20%)	153.5	8.3	24 h	Immobilization	EC50	>200	>0.00130293159609121	Daphnia magna	Crustacean	-	A. Jemec et al. / Journal of Hazardous Materials 219–220 (2012) 213–220	If the MCNM composition is not noted in the MCNM or information tab, composition is based on the stoichiometry
CuO–CeO2	CuO doped CeO2 (10%)	162.75	9.1	48 h	Immobilization	EC50	>200	>0.00122887864823349	Daphnia magna	Crustacean	-	A. Jemec et al. / Journal of Hazardous Materials 219–220 (2012) 213–220	If the MCNM composition is not noted in the MCNM or information tab, composition is based on the stoichiometry
CuO–CeO2	CuO doped CeO2 (15%)	158.125	8.4	48 h	Immobilization	EC50	>200	>0.00126482213438735	Daphnia magna	Crustacean	-	A. Jemec et al. / Journal of Hazardous Materials 219–220 (2012) 213–220	If the MCNM composition is not noted in the MCNM or information tab, composition is based on the stoichiometry
CuO–CeO2	CuO doped CeO2 (20%)	153.5	8.3	48 h	Immobilization	EC50	200	0.00130293	Daphnia magna	Crustacean	-2.88508	A. Jemec et al. / Journal of Hazardous Materials 219–220 (2012) 213–220	If the MCNM composition is not noted in the MCNM or information tab, composition is based on the stoichiometry
CuO–CeO2	CuO doped CeO2 (10%)	162.75	9.1	96 h	Larvae hatching	EC50	>500	>0.00307219662058372	Danio rerio larvae	Fish	-	A. Jemec et al. / Journal of Hazardous Materials 219–220 (2012) 213–220	If the MCNM composition is not noted in the MCNM or information tab, composition is based on the stoichiometry
CuO–CeO2	CuO doped CeO2 (15%)	158.125	8.4	96 h	Larvae hatching	EC50	>500	>0.00316205533596838	Danio rerio larvae	Fish	-	A. Jemec et al. / Journal of Hazardous Materials 219–220 (2012) 213–220	If the MCNM composition is not noted in the MCNM or information tab, composition is based on the stoichiometry
CuO–CeO2	CuO doped CeO2 (20%)	153.5	8.3	96 h	Larvae hatching	EC50	>500	>0.00325732899022801	Danio rerio larvae	Fish	-	A. Jemec et al. / Journal of Hazardous Materials 219–220 (2012) 213–220	If the MCNM composition is not noted in the MCNM or information tab, composition is based on the stoichiometry
CuO–CeO2	CuO doped CeO2 (10%)	162.75	9.1	7 days	Larvae hatching	EC50	>500	>0.00307219662058372	Danio rerio larvae	Fish	-	A. Jemec et al. / Journal of Hazardous Materials 219–220 (2012) 213–220	If the MCNM composition is not noted in the MCNM or information tab, composition is based on the stoichiometry
CuO–CeO2	CuO doped CeO2 (15%)	158.125	8.4	7 days	Larvae hatching	EC50	>500	>0.00316205533596838	Danio rerio larvae	Fish	-	A. Jemec et al. / Journal of Hazardous Materials 219–220 (2012) 213–220	If the MCNM composition is not noted in the MCNM or information tab, composition is based on the stoichiometry
CuO–CeO2	CuO doped CeO2 (20%)	153.5	8.3	7 days	Larvae hatching	EC50	>500	>0.00325732899022801	Danio rerio larvae	Fish	-	A. Jemec et al. / Journal of Hazardous Materials 219–220 (2012) 213–220	If the MCNM composition is not noted in the MCNM or information tab, composition is based on the stoichiometry
CeO:ZrO2	composite (74%CeO2)	159.26	34.9	96 h	Larvae hatching	EC50	>100	>0.000627904056260204	Danio rerio larvae	Fish	-	A. Jemec et al. / Science of the Total Environment 506–507 (2015) 272–278	If the MCNM composition is not noted in the MCNM or information tab, composition is based on the stoichiometry
3NiCoCeO2:ZrO	composite (32%CeO2)w 3%NiCo	136.29	20	96 h	Larvae hatching	EC50	>100	>0.000733731700731384	Danio rerio larvae	Fish	-	A. Jemec et al. / Science of the Total Environment 506–507 (2015) 272–278	If the MCNM composition is not noted in the MCNM or information tab, composition is based on the stoichiometry
6NiCoCeO2:ZrO	composite (32%CeO2)w 6%NiCo	133.899	41	96 h	Larvae hatching	EC50	>100	>0.000746830451563564	Danio rerio larvae	Fish	-	A. Jemec et al. / Science of the Total Environment 506–507 (2015) 272–278	If the MCNM composition is not noted in the MCNM or information tab, composition is based on the stoichiometry
12NiCoCeO2:ZrO	composite (32%CeO2)w 12%NiCo	129.118	70	96 h	Larvae hatching	EC50	>100	>0.000774482955179122	Danio rerio larvae	Fish	-	A. Jemec et al. / Science of the Total Environment 506–507 (2015) 272–278	If the MCNM composition is not noted in the MCNM or information tab, composition is based on the stoichiometry
18NiCoCeO2:ZrO	composite (32%CeO2)w 18%NiCo	124.338	82	96 h	Larvae hatching	EC50	>100	>0.000804261944898406	Danio rerio larvae	Fish	-	A. Jemec et al. / Science of the Total Environment 506–507 (2015) 272–278	If the MCNM composition is not noted in the MCNM or information tab, composition is based on the stoichiometry
CuO–CeO2	CuO doped CeO2 (10%)	162.75	9.1	96 h	Larvae hatching	EC50	>100	>0.000614439324116743	Danio rerio larvae	Fish	-	A. Jemec et al. / Science of the Total Environment 506–507 (2015) 272–278	If the MCNM composition is not noted in the MCNM or information tab, composition is based on the stoichiometry
CuO–CeO2	CuO doped CeO2 (15%)	158.125	8.4	96 h	Larvae hatching	EC50	>100	>0.000632411067193676	Danio rerio larvae	Fish	-	A. Jemec et al. / Science of the Total Environment 506–507 (2015) 272–278	If the MCNM composition is not noted in the MCNM or information tab, composition is based on the stoichiometry
CuO–CeO2	CuO doped CeO2 (20%)	153.5	8.3	96 h	Larvae hatching	EC50	>100	>0.000651465798045603	Danio rerio larvae	Fish	-	A. Jemec et al. / Science of the Total Environment 506–507 (2015) 272–278	If the MCNM composition is not noted in the MCNM or information tab, composition is based on the stoichiometry
Fe-ZnO	Fe doped ZnO (10%)	80.1	10	5 days	Seed germination	EC50	>500	>0.00307219662058372	Pisum sativum L.	Plants	-	A. Mukherjee et al. / Chemical Engineering Journal 258 (2014) 394–401	If the MCNM composition is not noted in the MCNM or information tab, composition is based on the stoichiometry
Fe-ZnO	Fe doped ZnO (10%)	80.1	10	5 days	Root growth inhibition assay	EC50	>500	>0.00316205533596838	Pisum sativum L.	Plants	-	A. Mukherjee et al. / Chemical Engineering Journal 258 (2014) 394–401	If the MCNM composition is not noted in the MCNM or information tab, composition is based on the stoichiometry
Fe-ZnO	Fe doped ZnO (10%)	80.1	10	5 days	stem growth inhibition assay	EC50	>500	>0.00325732899022801	Pisum sativum L.	Plants	-	A. Mukherjee et al. / Chemical Engineering Journal 258 (2014) 394–401	If the MCNM composition is not noted in the MCNM or information tab, composition is based on the stoichiometry
Fe:CuO	Fe doped CuO (3%)	78.795	150	24 h	biofilm inhibition assay	IC50	80	0.00101529	C. albicans	Eukaryotes	-2.99341	A. Pugazhendhi et al. Microbial Pathogenesis 122 (2018) 84–89	If the MCNM composition is not noted in the MCNM or information tab, composition is based on the stoichiometry
Ag:TiO2	Ag-doped TiO2 on surface (16.7%)	84.676	40	48 H	MTT	IC50	150	0.00177146	Leishmania infantum	Eukaryotes	-2.75167	A.M. Allahverdiyev et al. / Experimental Parasitology 135 (2013) 55–63 57	If the MCNM composition is not noted in the MCNM or information tab, composition is based on the stoichiometry
Ag:TiO2	Ag-doped TiO2 on surface (16.7%)	84.676	40	48 H	MTT	IC50	100	0.00118097	Leishmania tropica	Eukaryotes	-2.92776	A.M. Allahverdiyev et al. / Experimental Parasitology 135 (2013) 55–63 57	If the MCNM composition is not noted in the MCNM or information tab, composition is based on the stoichiometry
Cu:Ni (50% wt)	Nanocomposite (Ni: 50%w, 48% mol)	60.705	25.12	24 h	Mortality assay	LC50	50	0.000823655	A. salina	Crustacean	-3.08425	Abdullah et al, Journal of Saudi Chemical Society, 26, 4, 2022, 101486	If the MCNM composition is not noted in the MCNM or information tab, composition is based on the stoichiometry
Cu:Ni (50% wt)	Nanocomposite (Ni: 50%w, 48% mol)	60.705	25.12	72 h	Mortality	LC50	100	0.00164731	L. tropica	Eukaryotes	-2.78322	Abdullah et al, Journal of Saudi Chemical Society, 26, 4, 2022, 101486	If the MCNM composition is not noted in the MCNM or information tab, composition is based on the stoichiometry
Cu:Ni (50% wt)	Nanocomposite (Ni: 50%w, 48% mol)	60.705	25.12	72 h	Mortality	LC50	200	0.00329462	L. tropica	Eukaryotes	-2.48219	Abdullah et al, Journal of Saudi Chemical Society, 26, 4, 2022, 101486	If the MCNM composition is not noted in the MCNM or information tab, composition is based on the stoichiometry
Au-Ag	Bimetallic NP(80% Ag)	125.8	44-55	24 h	growth inhibition assay	IC50	20	0.000158983	E.Coli	Bacteria	-3.79865	Adebayo et al., Nanotechnology for Environmental Engineering (2019) 4:13	If the MCNM composition is not noted in the MCNM or information tab, composition is based on the stoichiometry
Au-Ag	Bimetallic NP(80% Ag)	125.8	44-55	24 h	growth inhibition assay	IC50	60	0.000476948	E.Coli	Bacteria	-3.32153	Adebayo et al., Nanotechnology for Environmental Engineering (2019) 4:13	If the MCNM composition is not noted in the MCNM or information tab, composition is based on the stoichiometry
Au-Ag	Bimetallic NP(80% Ag)	125.8	44-55	24 h	growth inhibition assay	IC50	20	0.000158983	Bacillus subtilis	Bacteria	-3.79865	Adebayo et al., Nanotechnology for Environmental Engineering (2019) 4:13	If the MCNM composition is not noted in the MCNM or information tab, composition is based on the stoichiometry
Au-Ag	Bimetallic NP(80% Ag)	125.8	44-55	24 h	growth inhibition assay	IC50	80	0.00063593	Klebsiella pneumoniae	Bacteria	-3.19659	Adebayo et al., Nanotechnology for Environmental Engineering (2019) 4:13	If the MCNM composition is not noted in the MCNM or information tab, composition is based on the stoichiometry
Au-Ag	Bimetallic NP(80% Ag)	125.8	44-55	24 h	growth inhibition assay	IC50	20	0.000158983	Listeria monocytogenes	Bacteria	-3.79865	Adebayo et al., Nanotechnology for Environmental Engineering (2019) 4:13	If the MCNM composition is not noted in the MCNM or information tab, composition is based on the stoichiometry
Au-Ag	Bimetallic NP(80% Ag)	125.8	44-55	24 h	growth inhibition assay	IC50	20	0.000158983	Proteus vulgaris	Bacteria	-3.79865	Adebayo et al., Nanotechnology for Environmental Engineering (2019) 4:13	If the MCNM composition is not noted in the MCNM or information tab, composition is based on the stoichiometry
Au-Ag	Bimetallic NP(80% Ag)	125.8	44-55	24 h	growth inhibition assay	IC50	80	0.00063593	Pseudomonas aeruginosa	Bacteria	-3.19659	Adebayo et al., Nanotechnology for Environmental Engineering (2019) 4:13	If the MCNM composition is not noted in the MCNM or information tab, composition is based on the stoichiometry
Au-Ag	Bimetallic NP(80% Ag)	125.8	44-55	24 h	growth inhibition assay	IC50	60	0.000476948	S. aureus	Bacteria	-3.32153	Adebayo et al., Nanotechnology for Environmental Engineering (2019) 4:13	If the MCNM composition is not noted in the MCNM or information tab, composition is based on the stoichiometry
Au-Ag	Bimetallic NP(80% Ag)	125.8	44-55	24 h	growth inhibition assay	IC50	40	0.000317965	S. aureus	Bacteria	-3.49762	Adebayo et al., Nanotechnology for Environmental Engineering (2019) 4:13	If the MCNM composition is not noted in the MCNM or information tab, composition is based on the stoichiometry
Au-Ag	Bimetallic NP(80% Ag)	125.8	44-55	24 h	growth inhibition assay	IC50	60	0.000476948	Streptococcus pyogenes	Bacteria	-3.32153	Adebayo et al., Nanotechnology for Environmental Engineering (2019) 4:13	If the MCNM composition is not noted in the MCNM or information tab, composition is based on the stoichiometry
CoFe2O4		235	40	72 h	Hatching rate	EC50		1e-05	Danio rerio embryos	Fish	-5	Ahmad et al. / Aquatic Toxicology 166 (2015) 21–28	If the MCNM composition is not noted in the MCNM or information tab, composition is based on the stoichiometry
Sr:Ag2O	Sr doped Ag2O (1%)	230.56	43.44	24 h	Mortality assay	LC50	5	2.16863e-05	A. salina	Crustacean	-4.66381	Ahmad Kiani et al., ARTIFICIAL CELLS, NANOMEDICINE, AND BIOTECHNOLOGY, 2018, VOL. 46, NO. S3, S1083–S1091	If the MCNM composition is not noted in the MCNM or information tab, composition is based on the stoichiometry
Sr:Ag2O	Sr doped Ag2O (3%)	227.68	36.92	24 h	Mortality assay	LC50	30	0.000131764	A. salina	Crustacean	-3.8802	Ahmad Kiani et al., ARTIFICIAL CELLS, NANOMEDICINE, AND BIOTECHNOLOGY, 2018, VOL. 46, NO. S3, S1083–S1091	If the MCNM composition is not noted in the MCNM or information tab, composition is based on the stoichiometry
Sr:Ag2O	Sr doped Ag2O (5%)	224.8	33.95	24 h	Mortality assay	LC50	5	2.2242e-05	A. salina	Crustacean	-4.65283	Ahmad Kiani et al., ARTIFICIAL CELLS, NANOMEDICINE, AND BIOTECHNOLOGY, 2018, VOL. 46, NO. S3, S1083–S1091	If the MCNM composition is not noted in the MCNM or information tab, composition is based on the stoichiometry
Sr:Ag2O	Sr doped Ag2O (7%)	221.92	38.2	24 h	Mortality assay	LC50	37.5	0.00016898	A. salina	Crustacean	-3.77217	Ahmad Kiani et al., ARTIFICIAL CELLS, NANOMEDICINE, AND BIOTECHNOLOGY, 2018, VOL. 46, NO. S3, S1083–S1091	If the MCNM composition is not noted in the MCNM or information tab, composition is based on the stoichiometry
Sr:Ag2O	Sr doped Ag2O (9%)	219.04	35.65	24 h	Mortality assay	LC50	45	0.000205442	A. salina	Crustacean	-3.68731	Ahmad Kiani et al., ARTIFICIAL CELLS, NANOMEDICINE, AND BIOTECHNOLOGY, 2018, VOL. 46, NO. S3, S1083–S1091	If the MCNM composition is not noted in the MCNM or information tab, composition is based on the stoichiometry
Ni0.03Cr1.97O3		149.21	18.44	24 h	Plate count	EC50	100	0.000670196	E. Coli	Bacteria	-3.1738	Almontasser et al., Appl Nanosci 11, 583–604 (2021)	If the MCNM composition is not noted in the MCNM or information tab, composition is based on the stoichiometry
Ni0.05Cr1.95O3		147.35	18.83	24 h	Plate count	EC50	100	0.000678656	E. Coli	Bacteria	-3.16835	Almontasser et al., Appl Nanosci 11, 583–604 (2021)	If the MCNM composition is not noted in the MCNM or information tab, composition is based on the stoichiometry
Ni0.07Cr1.93O3		145.49	19.15	24 h	Plate count	EC50	100	0.000687332	E. Coli	Bacteria	-3.16283	Almontasser et al., Appl Nanosci 11, 583–604 (2021)	If the MCNM composition is not noted in the MCNM or information tab, composition is based on the stoichiometry
Co0.01Cr1.99O3		151.07	14.45	24 h	Plate count	EC50	100	0.000661945	E. Coli	Bacteria	-3.17918	Almontasser et al., Appl Nanosci 11, 583–604 (2021)	If the MCNM composition is not noted in the MCNM or information tab, composition is based on the stoichiometry
Co0.03Cr1.97O3		149.21	15.24	24 h	Plate count	EC50	100	0.000670196	E. Coli	Bacteria	-3.1738	Almontasser et al., Appl Nanosci 11, 583–604 (2021)	If the MCNM composition is not noted in the MCNM or information tab, composition is based on the stoichiometry
Co0.05Cr1.95O3		147.35	16.91	24 h	Plate count	EC50	100	0.000678656	E. Coli	Bacteria	-3.16835	Almontasser et al., Appl Nanosci 11, 583–604 (2021)	If the MCNM composition is not noted in the MCNM or information tab, composition is based on the stoichiometry
Co0.07Cr1.93O3		145.49	16.98	24 h	Plate count	EC50	100	0.000687332	E. Coli	Bacteria	-3.16283	Almontasser et al., Appl Nanosci 11, 583–604 (2021)	If the MCNM composition is not noted in the MCNM or information tab, composition is based on the stoichiometry
Fe0.01Cr1.99O3		151.04	14.12	24 h	Plate count	EC50	100	0.000662076	E. Coli	Bacteria	-3.17909	Almontasser et al., Appl Nanosci 11, 583–604 (2021)	If the MCNM composition is not noted in the MCNM or information tab, composition is based on the stoichiometry
Fe0.03Cr1.97O3		149.12	14.52	24 h	Plate count	EC50	100	0.000670601	E. Coli	Bacteria	-3.17354	Almontasser et al., Appl Nanosci 11, 583–604 (2021)	If the MCNM composition is not noted in the MCNM or information tab, composition is based on the stoichiometry
Fe0.05Cr1.95O3		147.2	15.23	24 h	Plate count	EC50	100	0.000679348	E. Coli	Bacteria	-3.16791	Almontasser et al., Appl Nanosci 11, 583–604 (2021)	If the MCNM composition is not noted in the MCNM or information tab, composition is based on the stoichiometry
Fe0.07Cr1.93O3		145.28	15.55	24 h	Plate count	EC50	100	0.000688326	E. Coli	Bacteria	-3.16221	Almontasser et al., Appl Nanosci 11, 583–604 (2021)	If the MCNM composition is not noted in the MCNM or information tab, composition is based on the stoichiometry
Ni0.07Cr1.93O3		145.49	19.15	24 h	Plate count	EC50	100	0.000687332	S. aureus	Bacteria	-3.16283	Almontasser et al., Appl Nanosci 11, 583–604 (2021)	If the MCNM composition is not noted in the MCNM or information tab, composition is based on the stoichiometry
Co0.03Cr1.97O3		149.21	15.24	24 h	Plate count	EC50	100	0.000670196	S. aureus	Bacteria	-3.1738	Almontasser et al., Appl Nanosci 11, 583–604 (2021)	If the MCNM composition is not noted in the MCNM or information tab, composition is based on the stoichiometry
Co0.05Cr1.95O3		147.35	16.91	24 h	Plate count	EC50	100	0.000678656	S. aureus	Bacteria	-3.16835	Almontasser et al., Appl Nanosci 11, 583–604 (2021)	If the MCNM composition is not noted in the MCNM or information tab, composition is based on the stoichiometry
Co0.07Cr1.93O3		145.49	16.98	24 h	Plate count	EC50	100	0.000687332	S. aureus	Bacteria	-3.16283	Almontasser et al., Appl Nanosci 11, 583–604 (2021)	If the MCNM composition is not noted in the MCNM or information tab, composition is based on the stoichiometry
Fe0.01Cr1.99O3		151.04	14.12	24 h	Plate count	EC50	100	0.000662076	S. aureus	Bacteria	-3.17909	Almontasser et al., Appl Nanosci 11, 583–604 (2021)	If the MCNM composition is not noted in the MCNM or information tab, composition is based on the stoichiometry
Fe0.03Cr1.97O3		149.12	14.52	24 h	Plate count	EC50	100	0.000670601	S. aureus	Bacteria	-3.17354	Almontasser et al., Appl Nanosci 11, 583–604 (2021)	If the MCNM composition is not noted in the MCNM or information tab, composition is based on the stoichiometry
Fe0.05Cr1.95O3		147.2	15.23	24 h	Plate count	EC50	100	0.000679348	S. aureus	Bacteria	-3.16791	Almontasser et al., Appl Nanosci 11, 583–604 (2021)	If the MCNM composition is not noted in the MCNM or information tab, composition is based on the stoichiometry
Fe0.07Cr1.93O3		145.28	15.55	24 h	Plate count	EC50	100	0.000688326	S. aureus	Bacteria	-3.16221	Almontasser et al., Appl Nanosci 11, 583–604 (2021)	If the MCNM composition is not noted in the MCNM or information tab, composition is based on the stoichiometry
Ni:TiO2	Ni doped TiO2 (5%)	78.95	100-150	24 h	Survival assay	EC50	>1000	>0.012666244458518	E. Coli	Bacteria	-	Ananpattarachai et al., Environ Sci Pollut Res,2016;23(5):4111-9	If the MCNM composition is not noted in the MCNM or information tab, composition is based on the stoichiometry
Ni:TiO2	Ni doped TiO2 (5%)	78.95	100-150	24 h	Survival assay	EC50	>1000	>0.012666244458518	S. aureus	Bacteria	-	Ananpattarachai et al., Environ Sci Pollut Res,2016;23(5):4111-9	If the MCNM composition is not noted in the MCNM or information tab, composition is based on the stoichiometry
TiO2–ZnO-MgO	TiO2 doped with ZnO (1%) and MgO (1%)	79.61	17-23	24 h	Mortality assay	LC50	238.08	0.00299058	A. salina	Crustacean	-2.52424	Anaya-Esparza et al., Nanomaterials 2019, 9, 992	If the MCNM composition is not noted in the MCNM or information tab, composition is based on the stoichiometry
TiO2–ZnO-MgO	TiO2 doped with ZnO (3%) and MgO (3%)	78.83	17-23	24 h	Mortality assay	LC50	891.11	0.0113042	A. salina	Crustacean	-1.94676	Anaya-Esparza et al., Nanomaterials 2019, 9, 992	If the MCNM composition is not noted in the MCNM or information tab, composition is based on the stoichiometry
TiO2–ZnO-MgO	TiO2 doped with ZnO (5%) and MgO (5%)	78.05	17-23	24 h	Mortality assay	LC50	1468.18	0.0188108	A. salina	Crustacean	-1.72559	Anaya-Esparza et al., Nanomaterials 2019, 9, 992	If the MCNM composition is not noted in the MCNM or information tab, composition is based on the stoichiometry
Au:Ag (16.7% Au)	Nanocomposite	122.863	1–60	48 h	Mortality assay	LC50	25.73	0.00020942	A. salina	Crustacean	-3.67898	Anjum et al., RSC Adv., 2022, 12, 23845-23859	If the MCNM composition is not noted in the MCNM or information tab, composition is based on the stoichiometry
Au:ZnO (16.7% Au)	Nanocomposite	100.372	20–100	48 h	Mortality assay	LC50	20.96	0.000208823	A. salina	Crustacean	-3.68022	Anjum et al., RSC Adv., 2022, 12, 23845-23859	If the MCNM composition is not noted in the MCNM or information tab, composition is based on the stoichiometry
Ag:ZnO (50% Ag)	Nanocomposite	94.5	10–70	48 h	Mortality assay	LC50	21.63	0.000228889	A. salina	Crustacean	-3.64038	Anjum et al., RSC Adv., 2022, 12, 23845-23859	If the MCNM composition is not noted in the MCNM or information tab, composition is based on the stoichiometry
Se:CeO2	Se doped CeO2(1%)	171.39	7--9	8 days	Seed germination	EC50	>300	>0.00175039383861369	Macrotyloma uniflorum	Plants	-	Antony et al., Biocatalysis and Agricultural Biotechnology 31 (2021) 101923	If the MCNM composition is not noted in the MCNM or information tab, composition is based on the stoichiometry
Se:CeO2	Se doped CeO2(1%)	171.39	7--9	8 days	Root Length	EC50	>300	>0.00175039383861369	Macrotyloma uniflorum	Plants	-	Antony et al., Biocatalysis and Agricultural Biotechnology 31 (2021) 101923	If the MCNM composition is not noted in the MCNM or information tab, composition is based on the stoichiometry
Se:CeO2	Se doped CeO2(1%)	171.39	7--9	8 days	Shoot length	EC50	>300	>0.00175039383861369	Macrotyloma uniflorum	Plants	-	Antony et al., Biocatalysis and Agricultural Biotechnology 31 (2021) 101923	If the MCNM composition is not noted in the MCNM or information tab, composition is based on the stoichiometry
ZnO:ZrO2(0.091)	Composite oxide (9.1% ZnO)	119.178	-	24 h	growth inhibition assay	IC50	10000	0.0839081	C. albicans	Eukaryotes	-1.0762	Ayanwale et al., Inorganic Chemistry Communications 134 (2021) 108954	If the MCNM composition is not noted in the MCNM or information tab, composition is based on the stoichiometry
ZnO:ZrO2(0.2)	Composite oxide (20% ZnO)	114.6	-	24 h	growth inhibition assay	IC50	10000	0.08726	C. albicans	Eukaryotes	-1.05918	Ayanwale et al., Inorganic Chemistry Communications 134 (2021) 108954	If the MCNM composition is not noted in the MCNM or information tab, composition is based on the stoichiometry
ZnO:ZrO2(0.33)	Composite oxide (33% ZnO)	109.14	-	24 h	growth inhibition assay	IC50	10000	0.0916254	C. albicans	Eukaryotes	-1.03798	Ayanwale et al., Inorganic Chemistry Communications 134 (2021) 108954	If the MCNM composition is not noted in the MCNM or information tab, composition is based on the stoichiometry
ZnO:ZrO2(0.091)	Composite oxide (9.1% ZnO)	119.178	-	24 h	growth inhibition assay	IC50	10000	0.0839081	C. dubliniensis	Eukaryotes	-1.0762	Ayanwale et al., Inorganic Chemistry Communications 134 (2021) 108954	If the MCNM composition is not noted in the MCNM or information tab, composition is based on the stoichiometry
ZnO:ZrO2(0.2)	Composite oxide (20% ZnO)	114.6	-	24 h	growth inhibition assay	IC50	10000	0.08726	C. dubliniensis	Eukaryotes	-1.05918	Ayanwale et al., Inorganic Chemistry Communications 134 (2021) 108954	If the MCNM composition is not noted in the MCNM or information tab, composition is based on the stoichiometry
ZnO:ZrO2(0.091)	Composite oxide (9.1% ZnO)	119.178	-	24 h	growth inhibition assay	IC50	10000	0.0839081	C. glabrata	Eukaryotes	-1.0762	Ayanwale et al., Inorganic Chemistry Communications 134 (2021) 108954	If the MCNM composition is not noted in the MCNM or information tab, composition is based on the stoichiometry
ZnO:ZrO2(0.2)	Composite oxide (20% ZnO)	114.6	-	24 h	growth inhibition assay	IC50	10000	0.08726	C. glabrata	Eukaryotes	-1.05918	Ayanwale et al., Inorganic Chemistry Communications 134 (2021) 108954	If the MCNM composition is not noted in the MCNM or information tab, composition is based on the stoichiometry
ZnO:ZrO2(0.33)	Composite oxide (33% ZnO)	109.14	-	24 h	growth inhibition assay	IC50	10000	0.0916254	C. glabrata	Eukaryotes	-1.03798	Ayanwale et al., Inorganic Chemistry Communications 134 (2021) 108954	If the MCNM composition is not noted in the MCNM or information tab, composition is based on the stoichiometry
ZnO:ZrO2(0.091)	Composite oxide (9.1% ZnO)	119.178	-	24 h	growth inhibition assay	IC50	10000	0.0839081	C. tropicalis	Eukaryotes	-1.0762	Ayanwale et al., Inorganic Chemistry Communications 134 (2021) 108954	If the MCNM composition is not noted in the MCNM or information tab, composition is based on the stoichiometry
ZnO:ZrO2(0.2)	Composite oxide (20% ZnO)	114.6	-	24 h	growth inhibition assay	IC50	10000	0.08726	C. tropicalis	Eukaryotes	-1.05918	Ayanwale et al., Inorganic Chemistry Communications 134 (2021) 108954	If the MCNM composition is not noted in the MCNM or information tab, composition is based on the stoichiometry
Ag2O:ZrO2 (0.091)	Composite oxide (9.1% Ag2O)	132.919	42	24 h	growth inhibition assay	IC50	>100	>0.000752337889993154	C. albicans	Eukaryotes	-	Ayanwale et al., Processes 2021, 9, 773	If the MCNM composition is not noted in the MCNM or information tab, composition is based on the stoichiometry
Ag2O:ZrO2 (0.2)	Composite oxide (20% Ag2O)	144.8	35	24 h	growth inhibition assay	IC50	100	0.000690608	C. albicans	Eukaryotes	-3.16077	Ayanwale et al., Processes 2021, 9, 773	If the MCNM composition is not noted in the MCNM or information tab, composition is based on the stoichiometry
Ag2O:ZrO2 (0.33)	Composite oxide (33% Ag2O)	158.97	21	24 h	growth inhibition assay	IC50	100	0.00062905	C. albicans	Eukaryotes	-3.20132	Ayanwale et al., Processes 2021, 9, 773	If the MCNM composition is not noted in the MCNM or information tab, composition is based on the stoichiometry
Ag2O:ZrO2 (0.5)	Composite oxide (50% Ag2O)	177.5	15	24 h	growth inhibition assay	IC50	100	0.00056338	C. albicans	Eukaryotes	-3.2492	Ayanwale et al., Processes 2021, 9, 773	If the MCNM composition is not noted in the MCNM or information tab, composition is based on the stoichiometry
Ag2O:ZrO2 (0.67)	Composite oxide (67% Ag2O)	196.03	14	24 h	growth inhibition assay	IC50	100	0.000510126	C. albicans	Eukaryotes	-3.29232	Ayanwale et al., Processes 2021, 9, 773	If the MCNM composition is not noted in the MCNM or information tab, composition is based on the stoichiometry
Ag2O:ZrO2 (0.091)	Composite oxide (9.1% Ag2O)	132.919	42	24 h	growth inhibition assay	IC50	100	0.000752338	C. dubliniensis	Eukaryotes	-3.12359	Ayanwale et al., Processes 2021, 9, 773	If the MCNM composition is not noted in the MCNM or information tab, composition is based on the stoichiometry
Ag2O:ZrO2 (0.2)	Composite oxide (20% Ag2O)	144.8	35	24 h	growth inhibition assay	IC50	100	0.000690608	C. dubliniensis	Eukaryotes	-3.16077	Ayanwale et al., Processes 2021, 9, 773	If the MCNM composition is not noted in the MCNM or information tab, composition is based on the stoichiometry
Ag2O:ZrO2 (0.33)	Composite oxide (33% Ag2O)	158.97	21	24 h	growth inhibition assay	IC50	100	0.00062905	C. dubliniensis	Eukaryotes	-3.20132	Ayanwale et al., Processes 2021, 9, 773	If the MCNM composition is not noted in the MCNM or information tab, composition is based on the stoichiometry
Ag2O:ZrO2 (0.5)	Composite oxide (50% Ag2O)	177.5	15	24 h	growth inhibition assay	IC50	100	0.00056338	C. dubliniensis	Eukaryotes	-3.2492	Ayanwale et al., Processes 2021, 9, 773	If the MCNM composition is not noted in the MCNM or information tab, composition is based on the stoichiometry
Ag2O:ZrO2 (0.67)	Composite oxide (67% Ag2O)	196.03	14	24 h	growth inhibition assay	IC50	100	0.000510126	C. dubliniensis	Eukaryotes	-3.29232	Ayanwale et al., Processes 2021, 9, 773	If the MCNM composition is not noted in the MCNM or information tab, composition is based on the stoichiometry
Ag2O:ZrO2 (0.091)	Composite oxide (9.1% Ag2O)	132.919	42	24 h	growth inhibition assay	IC50	>100	>0.000752337889993154	C. glabrata	Eukaryotes	-	Ayanwale et al., Processes 2021, 9, 773	If the MCNM composition is not noted in the MCNM or information tab, composition is based on the stoichiometry
Ag2O:ZrO2 (0.2)	Composite oxide (20% Ag2O)	144.8	35	24 h	growth inhibition assay	IC50	100	0.000690608	C. glabrata	Eukaryotes	-3.16077	Ayanwale et al., Processes 2021, 9, 773	If the MCNM composition is not noted in the MCNM or information tab, composition is based on the stoichiometry
Ag2O:ZrO2 (0.33)	Composite oxide (33% Ag2O)	158.97	21	24 h	growth inhibition assay	IC50	100	0.00062905	C. glabrata	Eukaryotes	-3.20132	Ayanwale et al., Processes 2021, 9, 773	If the MCNM composition is not noted in the MCNM or information tab, composition is based on the stoichiometry
Ag2O:ZrO2 (0.5)	Composite oxide (50% Ag2O)	177.5	15	24 h	growth inhibition assay	IC50	100	0.00056338	C. glabrata	Eukaryotes	-3.2492	Ayanwale et al., Processes 2021, 9, 773	If the MCNM composition is not noted in the MCNM or information tab, composition is based on the stoichiometry
Ag2O:ZrO2 (0.67)	Composite oxide (67% Ag2O)	196.03	14	24 h	growth inhibition assay	IC50	100	0.000510126	C. glabrata	Eukaryotes	-3.29232	Ayanwale et al., Processes 2021, 9, 773	If the MCNM composition is not noted in the MCNM or information tab, composition is based on the stoichiometry
Ag2O:ZrO2 (0.091)	Composite oxide (9.1% Ag2O)	132.919	42	24 h	growth inhibition assay	IC50	100	0.000752338	C. tropicalis	Eukaryotes	-3.12359	Ayanwale et al., Processes 2021, 9, 773	If the MCNM composition is not noted in the MCNM or information tab, composition is based on the stoichiometry
Ag2O:ZrO2 (0.2)	Composite oxide (20% Ag2O)	144.8	35	24 h	growth inhibition assay	IC50	100	0.000690608	C. tropicalis	Eukaryotes	-3.16077	Ayanwale et al., Processes 2021, 9, 773	If the MCNM composition is not noted in the MCNM or information tab, composition is based on the stoichiometry
Ag2O:ZrO2 (0.33)	Composite oxide (33% Ag2O)	158.97	21	24 h	growth inhibition assay	IC50	100	0.00062905	C. tropicalis	Eukaryotes	-3.20132	Ayanwale et al., Processes 2021, 9, 773	If the MCNM composition is not noted in the MCNM or information tab, composition is based on the stoichiometry
Ag2O:ZrO2 (0.5)	Composite oxide (50% Ag2O)	177.5	15	24 h	growth inhibition assay	IC50	100	0.00056338	C. tropicalis	Eukaryotes	-3.2492	Ayanwale et al., Processes 2021, 9, 773	If the MCNM composition is not noted in the MCNM or information tab, composition is based on the stoichiometry
Ag2O:ZrO2 (0.67)	Composite oxide (67% Ag2O)	196.03	14	24 h	growth inhibition assay	IC50	100	0.000510126	C. tropicalis	Eukaryotes	-3.29232	Ayanwale et al., Processes 2021, 9, 773	If the MCNM composition is not noted in the MCNM or information tab, composition is based on the stoichiometry
Ce:Y2O3	Ce doped Y2O3 (76.1%)	184.906	288.4	24 h	bactericidal assay	IC50	844.8	0.00456881	E. Coli	Bacteria	-2.3402	Bassous, ACS Biomater. Sci. Eng. 2021, 7, 5, 1787–1807	If the MCNM composition is not noted in the MCNM or information tab, composition is based on the stoichiometry
Ce:Y2O3	Ce doped Y2O3 (61%)	193.06	275.3	24 h	bactericidal assay	IC50	2563.3	0.0132772	E. Coli	Bacteria	-1.87689	Bassous, ACS Biomater. Sci. Eng. 2021, 7, 5, 1787–1807	If the MCNM composition is not noted in the MCNM or information tab, composition is based on the stoichiometry
Ce:Y2O3	Ce doped Y2O3 (49.5%)	217.35	285.3	24 h	bactericidal assay	IC50	2563.3	0.0117934	E. Coli	Bacteria	-1.92836	Bassous, ACS Biomater. Sci. Eng. 2021, 7, 5, 1787–1807	If the MCNM composition is not noted in the MCNM or information tab, composition is based on the stoichiometry
Y:CeO2	Y doped CeO2 (7.6%)	176.104	5.1	24 h	bactericidal assay	IC50	422.4	0.00239858	E. Coli	Bacteria	-2.62005	Bassous, ACS Biomater. Sci. Eng. 2021, 7, 5, 1787–1807	If the MCNM composition is not noted in the MCNM or information tab, composition is based on the stoichiometry
Y:CeO2	Y doped CeO2 (10.6%)	177.724	5.6	24 h	bactericidal assay	IC50	422.4	0.00237672	E. Coli	Bacteria	-2.62402	Bassous, ACS Biomater. Sci. Eng. 2021, 7, 5, 1787–1807	If the MCNM composition is not noted in the MCNM or information tab, composition is based on the stoichiometry
Y:CeO2	Y doped CeO2 (16.2%)	180.748	5.7	24 h	bactericidal assay	IC50	677.8	0.00374997	E. Coli	Bacteria	-2.42597	Bassous, ACS Biomater. Sci. Eng. 2021, 7, 5, 1787–1807	If the MCNM composition is not noted in the MCNM or information tab, composition is based on the stoichiometry
Co3O4:Fe2O3	Nanocomposite Co3O4 20%	176.2	-	24 h	growth inhibition assay	IC50	1200	0.00681044	B. subtilis	Bacteria	-2.16682	Bhushan et al., Applied Nanoscience (2018) 8:137–153	If the MCNM composition is not noted in the MCNM or information tab, composition is based on the stoichiometry
Co3O4:Fe2O3	Nanocomposite Co3O4 50%	200.5	-	24 h	growth inhibition assay	IC50	750	0.00374065	B. subtilis	Bacteria	-2.42705	Bhushan et al., Applied Nanoscience (2018) 8:137–153	If the MCNM composition is not noted in the MCNM or information tab, composition is based on the stoichiometry
Co3O4:Fe2O3	Nanocomposite Co3O4 20%	176.2	-	24 h	growth inhibition assay	IC50	750	0.00425653	E. Coli	Bacteria	-2.37094	Bhushan et al., Applied Nanoscience (2018) 8:137–153	If the MCNM composition is not noted in the MCNM or information tab, composition is based on the stoichiometry
Co3O4:Fe2O3	Nanocomposite Co3O4 50%	200.5	-	24 h	growth inhibition assay	IC50	600	0.00299252	E. Coli	Bacteria	-2.52396	Bhushan et al., Applied Nanoscience (2018) 8:137–153	If the MCNM composition is not noted in the MCNM or information tab, composition is based on the stoichiometry
Co3O4:Fe2O3	Nanocomposite Co3O4 20%	176.2	-	24 h	growth inhibition assay	IC50	750	0.00425653	S. aureus	Bacteria	-2.37094	Bhushan et al., Applied Nanoscience (2018) 8:137–153	If the MCNM composition is not noted in the MCNM or information tab, composition is based on the stoichiometry
Co3O4:Fe2O3	Nanocomposite Co3O4 50%	200.5	-	24 h	growth inhibition assay	IC50	750	0.00374065	S. aureus	Bacteria	-2.42705	Bhushan et al., Applied Nanoscience (2018) 8:137–153	If the MCNM composition is not noted in the MCNM or information tab, composition is based on the stoichiometry
Co3O4:Fe2O3	Nanocomposite Co3O4 20%	176.2	-	24 h	growth inhibition assay	IC50	900	0.00510783	S. typhi	Bacteria	-2.29176	Bhushan et al., Applied Nanoscience (2018) 8:137–153	If the MCNM composition is not noted in the MCNM or information tab, composition is based on the stoichiometry
Co3O4:Fe2O3	Nanocomposite Co3O4 50%	200.5	-	24 h	growth inhibition assay	IC50	750	0.00374065	S. typhi	Bacteria	-2.42705	Bhushan et al., Applied Nanoscience (2018) 8:137–153	If the MCNM composition is not noted in the MCNM or information tab, composition is based on the stoichiometry
(La0,6Sr0,4)0,95CoO3	Doped rare earth oxides	219.518	65	6 days	ostracodtoxkit f assay	EC50	51.5	0.000234605	Heterocypris incongruens (With sand)	Crustacean	-3.62966	Blinova et al., Science of the Total Environment 612 (2018) 1171–1176	If the MCNM composition is not noted in the MCNM or information tab, composition is based on the stoichiometry
La2NiO4	Doped rare earth oxides	400.7	284	6 days	ostracodtoxkit f assay	EC50	30	7.4869e-05	Heterocypris incongruens (With sand)	Crustacean	-4.1257	Blinova et al., Science of the Total Environment 612 (2018) 1171–1176	If the MCNM composition is not noted in the MCNM or information tab, composition is based on the stoichiometry
(La0,6Sr0,4)0,95CoO3	Doped rare earth oxides	219.518	65	6 days	ostracodtoxkit f assay	EC50	6.2	2.82437e-05	Heterocypris incongruens (Without sand)	Crustacean	-4.54908	Blinova et al., Science of the Total Environment 612 (2018) 1171–1176	If the MCNM composition is not noted in the MCNM or information tab, composition is based on the stoichiometry
La2NiO4	Doped rare earth oxides	400.7	284	6 days	ostracodtoxkit f assay	EC50	8.5	2.12129e-05	Heterocypris incongruens (Without sand)	Crustacean	-4.6734	Blinova et al., Science of the Total Environment 612 (2018) 1171–1176	If the MCNM composition is not noted in the MCNM or information tab, composition is based on the stoichiometry
LaCoO3	Doped rare earth oxides	246	590	24 h	Acute toxicity assay	EC50	70	0.000284553	Thamnocephalus platyurus	Crustacean	-3.54584	Blinova et al., Science of the Total Environment 612 (2018) 1171–1176	If the MCNM composition is not noted in the MCNM or information tab, composition is based on the stoichiometry
(La0,6Sr0,4)0,95CoO3	Doped rare earth oxides	219.518	65	24 h	Acute toxicity assay	EC50	33.3	0.000151696	Thamnocephalus platyurus	Crustacean	-3.81903	Blinova et al., Science of the Total Environment 612 (2018) 1171–1176	If the MCNM composition is not noted in the MCNM or information tab, composition is based on the stoichiometry
La2NiO4	Doped rare earth oxides	400.7	284	24 h	Acute toxicity assay	EC50	13	3.24432e-05	Thamnocephalus platyurus	Crustacean	-4.48888	Blinova et al., Science of the Total Environment 612 (2018) 1171–1176	If the MCNM composition is not noted in the MCNM or information tab, composition is based on the stoichiometry
Ce0,8Pr0,2O2	Doped rare earth oxides	172.2	23	7 days	growth inhibition assay	LC50	69.2	0.000401858	Lemna minor	Plants	-3.39593	Blinova et al., Science of the Total Environment 612 (2018) 1171–1176	If the MCNM composition is not noted in the MCNM or information tab, composition is based on the stoichiometry
LaFeO3	Doped rare earth oxides	243	126	7 days	growth inhibition assay	LC50	47.1	0.000193827	Lemna minor	Plants	-3.71259	Blinova et al., Science of the Total Environment 612 (2018) 1171–1176	If the MCNM composition is not noted in the MCNM or information tab, composition is based on the stoichiometry
(La0,6Sr0,4)0,95CoO3	Doped rare earth oxides	219.518	65	7 days	growth inhibition assay	LC50	7.53	3.43024e-05	Lemna minor	Plants	-4.46468	Blinova et al., Science of the Total Environment 612 (2018) 1171–1176	If the MCNM composition is not noted in the MCNM or information tab, composition is based on the stoichiometry
La2NiO4	Doped rare earth oxides	400.7	284	7 days	growth inhibition assay	LC50	29.1	7.26229e-05	Lemna minor	Plants	-4.13893	Blinova et al., Science of the Total Environment 612 (2018) 1171–1176	If the MCNM composition is not noted in the MCNM or information tab, composition is based on the stoichiometry
LaCoO3	Doped rare earth oxides	246	590	3 days	Spirodela Duckweed Toxkit	LC50	90	0.000365854	Spirodela polyrhiza	Plants	-3.43669	Blinova et al., Science of the Total Environment 612 (2018) 1171–1176	If the MCNM composition is not noted in the MCNM or information tab, composition is based on the stoichiometry
(La0,6Sr0,4)0,95CoO3	Doped rare earth oxides	219.518	65	3 days	Spirodela Duckweed Toxkit	LC50	6.38	2.90637e-05	Spirodela polyrhiza	Plants	-4.53665	Blinova et al., Science of the Total Environment 612 (2018) 1171–1176	If the MCNM composition is not noted in the MCNM or information tab, composition is based on the stoichiometry
La2NiO4	Doped rare earth oxides	400.7	284	3 days	Spirodela Duckweed Toxkit	LC50	66.7	0.000166459	Spirodela polyrhiza	Plants	-3.77869	Blinova et al., Science of the Total Environment 612 (2018) 1171–1176	If the MCNM composition is not noted in the MCNM or information tab, composition is based on the stoichiometry
Li0.27Ni0.33Mn0.33Co0.33O2		61	<100	7 days	Acute toxicity test	EC50	25	0.000409836	Daphnia magna	Crustacean	-3.38739	Bozich et al., Environ Toxicol Chem 2017;36:2493–2502	If the MCNM composition is not noted in the MCNM or information tab, composition is based on the stoichiometry
LiCoO2		49	<100	7 days	Acute toxicity test	EC50	25	0.000510204	Daphnia magna	Crustacean	-3.29226	Bozich et al., Environ Toxicol Chem 2017;36:2493–2502	If the MCNM composition is not noted in the MCNM or information tab, composition is based on the stoichiometry
ZnO:SiO2	SiO2w ZnO ON SURFACE (8%wt, 6%mol)	61.26	25	96 h	Mortality test	LC50	>100	>0.00163238654913484	Danio rerio embryos	Fish	-	Bragato et al.,Toxics 2022, 10(12), 781	If the MCNM composition is not noted in the MCNM or information tab, composition is based on the stoichiometry
ZnO:SiO2	SiO2w ZnO ON SURFACE (8%wt, 6%mol)	61.26	25	96 h	Hatching rate	EC50	>100	>0.00163238654913484	Danio rerio embryos	Fish	-	Bragato et al.,Toxics 2022, 10(12), 781	If the MCNM composition is not noted in the MCNM or information tab, composition is based on the stoichiometry
Al2O3:SiO2:Na2O	Zeolite(23%Al, 46%SiO2,31%Na2O)	70.28	<2μm	24 h	growth inhibition assay	IC50	700	0.00996016	S.aureus	Bacteria	-2.00173	Cardoso et al., Pol. J. Chem. Tech., Vol. 21, No. 4, 2019	If the MCNM composition is not noted in the MCNM or information tab, composition is based on the stoichiometry
Al2O3:SiO2:Na2O:CuO	Zeolite(23%Al, 46%SiO2,6%Na2O, 25%CuO)	74.655	<2μm	24 h	growth inhibition assay	IC50	>1200	>0.016073940124573	S.aureus	Bacteria	-	Cardoso et al., Pol. J. Chem. Tech., Vol. 21, No. 4, 2019	If the MCNM composition is not noted in the MCNM or information tab, composition is based on the stoichiometry
Al2O3:SiO2:Na2O:ZnO	Zeolite(23%Al, 46%SiO2,13%Na2O, 18%ZnO)	73.52	<2μm	24 h	growth inhibition assay	IC50	>1200	>0.0163220892274211	S.aureus	Bacteria	-	Cardoso et al., Pol. J. Chem. Tech., Vol. 21, No. 4, 2019	If the MCNM composition is not noted in the MCNM or information tab, composition is based on the stoichiometry
Al2O3:SiO2:Na2O:Co2O3	Zeolite(28%Al, 56%SiO2,6%Na2O, 10%Co2O3)	82.48	<2μm	24 h	growth inhibition assay	IC50	>1200	>0.01454898157129	S.aureus	Bacteria	-	Cardoso et al., Pol. J. Chem. Tech., Vol. 21, No. 4, 2019	If the MCNM composition is not noted in the MCNM or information tab, composition is based on the stoichiometry
Al2O3:SiO2:Na2O:Li2O	Zeolite(19%Al, 38%SiO2,4%Na2O, 39%Li2O)	56.36	<2μm	24 h	growth inhibition assay	IC50	>1200	>0.021291696238467	S.aureus	Bacteria	-	Cardoso et al., Pol. J. Chem. Tech., Vol. 21, No. 4, 2019	If the MCNM composition is not noted in the MCNM or information tab, composition is based on the stoichiometry
Al2O3:SiO2:Na2O:La2O3	Zeolite(25%Al, 50%SiO2,22%Na2O, 3%La2O3)	78.92	<2μm	24 h	growth inhibition assay	IC50	>1200	>0.015205271160669	S.aureus	Bacteria	-	Cardoso et al., Pol. J. Chem. Tech., Vol. 21, No. 4, 2019	If the MCNM composition is not noted in the MCNM or information tab, composition is based on the stoichiometry
Al2O3:SiO2:Na2O:CeO2	Zeolite(29%Al, 58%SiO2,3%Na2O, 10%CeO2)	69.24	<2μm	24 h	growth inhibition assay	IC50	>1200	>0.0173310225303293	S.aureus	Bacteria	-	Cardoso et al., Pol. J. Chem. Tech., Vol. 21, No. 4, 2019	If the MCNM composition is not noted in the MCNM or information tab, composition is based on the stoichiometry
Al2O3:SiO2:Na2O	Zeolite(23%Al, 46%SiO2,31%Na2O)	70.28	<2μm	24 h	growth inhibition assay	IC50	>1200	>0.0170745589072282	E. coli	Bacteria	-	Cardoso et al., Pol. J. Chem. Tech., Vol. 21, No. 4, 2019	If the MCNM composition is not noted in the MCNM or information tab, composition is based on the stoichiometry
Al2O3:SiO2:Na2O:CuO	Zeolite(23%Al, 46%SiO2,6%Na2O, 25%CuO)	74.655	<2μm	24 h	growth inhibition assay	IC50	>1200	>0.016073940124573	E. coli	Bacteria	-	Cardoso et al., Pol. J. Chem. Tech., Vol. 21, No. 4, 2019	If the MCNM composition is not noted in the MCNM or information tab, composition is based on the stoichiometry
Al2O3:SiO2:Na2O:ZnO	Zeolite(23%Al, 46%SiO2,13%Na2O, 18%ZnO)	73.52	<2μm	24 h	growth inhibition assay	IC50	>1200	>0.0163220892274211	E. coli	Bacteria	-	Cardoso et al., Pol. J. Chem. Tech., Vol. 21, No. 4, 2019	If the MCNM composition is not noted in the MCNM or information tab, composition is based on the stoichiometry
Al2O3:SiO2:Na2O:Co2O3	Zeolite(28%Al, 56%SiO2,6%Na2O, 10%Co2O3)	82.48	<2μm	24 h	growth inhibition assay	IC50	>1200	>0.01454898157129	E. coli	Bacteria	-	Cardoso et al., Pol. J. Chem. Tech., Vol. 21, No. 4, 2019	If the MCNM composition is not noted in the MCNM or information tab, composition is based on the stoichiometry
Al2O3:SiO2:Na2O:Li2O	Zeolite(19%Al, 38%SiO2,4%Na2O, 39%Li2O)	56.36	<2μm	24 h	growth inhibition assay	IC50	>1200	>0.021291696238467	E. coli	Bacteria	-	Cardoso et al., Pol. J. Chem. Tech., Vol. 21, No. 4, 2019	If the MCNM composition is not noted in the MCNM or information tab, composition is based on the stoichiometry
Al2O3:SiO2:Na2O:La2O3	Zeolite(25%Al, 50%SiO2,22%Na2O, 3%La2O3)	78.92	<2μm	24 h	growth inhibition assay	IC50	>1200	>0.015205271160669	E. coli	Bacteria	-	Cardoso et al., Pol. J. Chem. Tech., Vol. 21, No. 4, 2019	If the MCNM composition is not noted in the MCNM or information tab, composition is based on the stoichiometry
Al2O3:SiO2:Na2O:CeO2	Zeolite(29%Al, 58%SiO2,3%Na2O, 10%CeO2)	69.24	<2μm	24 h	growth inhibition assay	IC50	>1200	>0.0173310225303293	E. coli	Bacteria	-	Cardoso et al., Pol. J. Chem. Tech., Vol. 21, No. 4, 2019	If the MCNM composition is not noted in the MCNM or information tab, composition is based on the stoichiometry
Al2O3:SiO2:Na2O	Zeolite(23%Al, 46%SiO2,31%Na2O)	70.28	<2μm	24 h	growth inhibition assay	IC50	>1200	>0.0170745589072282	P. aureginosa	Bacteria	-	Cardoso et al., Pol. J. Chem. Tech., Vol. 21, No. 4, 2019	If the MCNM composition is not noted in the MCNM or information tab, composition is based on the stoichiometry
Al2O3:SiO2:Na2O:CuO	Zeolite(23%Al, 46%SiO2,6%Na2O, 25%CuO)	74.655	<2μm	24 h	growth inhibition assay	IC50	>1200	>0.016073940124573	P. aureginosa	Bacteria	-	Cardoso et al., Pol. J. Chem. Tech., Vol. 21, No. 4, 2019	If the MCNM composition is not noted in the MCNM or information tab, composition is based on the stoichiometry
Al2O3:SiO2:Na2O:ZnO	Zeolite(23%Al, 46%SiO2,13%Na2O, 18%ZnO)	73.52	<2μm	24 h	growth inhibition assay	IC50	>1200	>0.0163220892274211	P. aureginosa	Bacteria	-	Cardoso et al., Pol. J. Chem. Tech., Vol. 21, No. 4, 2019	If the MCNM composition is not noted in the MCNM or information tab, composition is based on the stoichiometry
Al2O3:SiO2:Na2O:Co2O3	Zeolite(28%Al, 56%SiO2,6%Na2O, 10%Co2O3)	82.48	<2μm	24 h	growth inhibition assay	IC50	>1200	>0.01454898157129	P. aureginosa	Bacteria	-	Cardoso et al., Pol. J. Chem. Tech., Vol. 21, No. 4, 2019	If the MCNM composition is not noted in the MCNM or information tab, composition is based on the stoichiometry
Al2O3:SiO2:Na2O:Li2O	Zeolite(19%Al, 38%SiO2,4%Na2O, 39%Li2O)	56.36	<2μm	24 h	growth inhibition assay	IC50	>1200	>0.021291696238467	P. aureginosa	Bacteria	-	Cardoso et al., Pol. J. Chem. Tech., Vol. 21, No. 4, 2019	If the MCNM composition is not noted in the MCNM or information tab, composition is based on the stoichiometry
Al2O3:SiO2:Na2O:La2O3	Zeolite(25%Al, 50%SiO2,22%Na2O, 3%La2O3)	78.92	<2μm	24 h	growth inhibition assay	IC50	>1200	>0.015205271160669	P. aureginosa	Bacteria	-	Cardoso et al., Pol. J. Chem. Tech., Vol. 21, No. 4, 2019	If the MCNM composition is not noted in the MCNM or information tab, composition is based on the stoichiometry
Al2O3:SiO2:Na2O:CeO2	Zeolite(29%Al, 58%SiO2,3%Na2O, 10%CeO2)	69.24	<2μm	24 h	growth inhibition assay	IC50	>1200	>0.0173310225303293	P. aureginosa	Bacteria	-	Cardoso et al., Pol. J. Chem. Tech., Vol. 21, No. 4, 2019	If the MCNM composition is not noted in the MCNM or information tab, composition is based on the stoichiometry
Al2O3:SiO2:Na2O	Zeolite(23%Al, 46%SiO2,31%Na2O)	70.28	<2μm	24 h	Mortality assay	LC50	>1200	>0.0170745589072282	A. salina	Crustacean	-	Cardoso et al., Pol. J. Chem. Tech., Vol. 21, No. 4, 2019	If the MCNM composition is not noted in the MCNM or information tab, composition is based on the stoichiometry
Al2O3:SiO2:Na2O:CuO	Zeolite(23%Al, 46%SiO2,6%Na2O, 25%CuO)	74.655	<2μm	24 h	Mortality assay	LC50	>1200	>0.016073940124573	A. salina	Crustacean	-	Cardoso et al., Pol. J. Chem. Tech., Vol. 21, No. 4, 2019	If the MCNM composition is not noted in the MCNM or information tab, composition is based on the stoichiometry
Al2O3:SiO2:Na2O:ZnO	Zeolite(23%Al, 46%SiO2,13%Na2O, 18%ZnO)	73.52	<2μm	24 h	Mortality assay	LC50	>1200	>0.0163220892274211	A. salina	Crustacean	-	Cardoso et al., Pol. J. Chem. Tech., Vol. 21, No. 4, 2019	If the MCNM composition is not noted in the MCNM or information tab, composition is based on the stoichiometry
Al2O3:SiO2:Na2O:Co2O3	Zeolite(28%Al, 56%SiO2,6%Na2O, 10%Co2O3)	82.48	<2μm	24 h	Mortality assay	LC50	>1200	>0.01454898157129	A. salina	Crustacean	-	Cardoso et al., Pol. J. Chem. Tech., Vol. 21, No. 4, 2019	If the MCNM composition is not noted in the MCNM or information tab, composition is based on the stoichiometry
Al2O3:SiO2:Na2O:Li2O	Zeolite(19%Al, 38%SiO2,4%Na2O, 39%Li2O)	56.36	<2μm	24 h	Mortality assay	LC50	>1200	>0.021291696238467	A. salina	Crustacean	-	Cardoso et al., Pol. J. Chem. Tech., Vol. 21, No. 4, 2019	If the MCNM composition is not noted in the MCNM or information tab, composition is based on the stoichiometry
Al2O3:SiO2:Na2O	Zeolite(23%Al, 46%SiO2,31%Na2O)	70.28	<2μm	24 h	growth inhibition assay	IC50	>1200	>0.0170745589072282	C. albicans	Eukaryotes	-	Cardoso et al., Pol. J. Chem. Tech., Vol. 21, No. 4, 2019	If the MCNM composition is not noted in the MCNM or information tab, composition is based on the stoichiometry
Al2O3:SiO2:Na2O:CuO	Zeolite(23%Al, 46%SiO2,6%Na2O, 25%CuO)	74.655	<2μm	24 h	growth inhibition assay	IC50	>1200	>0.016073940124573	C. albicans	Eukaryotes	-	Cardoso et al., Pol. J. Chem. Tech., Vol. 21, No. 4, 2019	If the MCNM composition is not noted in the MCNM or information tab, composition is based on the stoichiometry
Al2O3:SiO2:Na2O:ZnO	Zeolite(23%Al, 46%SiO2,13%Na2O, 18%ZnO)	73.52	<2μm	24 h	growth inhibition assay	IC50	>1200	>0.0163220892274211	C. albicans	Eukaryotes	-	Cardoso et al., Pol. J. Chem. Tech., Vol. 21, No. 4, 2019	If the MCNM composition is not noted in the MCNM or information tab, composition is based on the stoichiometry
Al2O3:SiO2:Na2O:Co2O3	Zeolite(28%Al, 56%SiO2,6%Na2O, 10%Co2O3)	82.48	<2μm	24 h	growth inhibition assay	IC50	>1200	>0.01454898157129	C. albicans	Eukaryotes	-	Cardoso et al., Pol. J. Chem. Tech., Vol. 21, No. 4, 2019	If the MCNM composition is not noted in the MCNM or information tab, composition is based on the stoichiometry
Al2O3:SiO2:Na2O:Li2O	Zeolite(19%Al, 38%SiO2,4%Na2O, 39%Li2O)	56.36	<2μm	24 h	growth inhibition assay	IC50	>1200	>0.021291696238467	C. albicans	Eukaryotes	-	Cardoso et al., Pol. J. Chem. Tech., Vol. 21, No. 4, 2019	If the MCNM composition is not noted in the MCNM or information tab, composition is based on the stoichiometry
Al2O3:SiO2:Na2O:La2O3	Zeolite(25%Al, 50%SiO2,22%Na2O, 3%La2O3)	78.92	<2μm	24 h	growth inhibition assay	IC50	>1200	>0.015205271160669	C. albicans	Eukaryotes	-	Cardoso et al., Pol. J. Chem. Tech., Vol. 21, No. 4, 2019	If the MCNM composition is not noted in the MCNM or information tab, composition is based on the stoichiometry
Al2O3:SiO2:Na2O:CeO2	Zeolite(29%Al, 58%SiO2,3%Na2O, 10%CeO2)	69.24	<2μm	24 h	growth inhibition assay	IC50	>1200	>0.0173310225303293	C. albicans	Eukaryotes	-	Cardoso et al., Pol. J. Chem. Tech., Vol. 21, No. 4, 2019	If the MCNM composition is not noted in the MCNM or information tab, composition is based on the stoichiometry
Al2O3:SiO2:Na2O	Zeolite(23%Al, 46%SiO2,31%Na2O)	70.28	<2μm	72 h	Seed germination	EC50	>1200	>0.0170745589072282	L. sativa	Plants	-	Cardoso et al., Pol. J. Chem. Tech., Vol. 21, No. 4, 2019	If the MCNM composition is not noted in the MCNM or information tab, composition is based on the stoichiometry
Al2O3:SiO2:Na2O:CuO	Zeolite(23%Al, 46%SiO2,6%Na2O, 25%CuO)	74.655	<2μm	72 h	Seed germination	EC50	>1200	>0.016073940124573	L. sativa	Plants	-	Cardoso et al., Pol. J. Chem. Tech., Vol. 21, No. 4, 2019	If the MCNM composition is not noted in the MCNM or information tab, composition is based on the stoichiometry
Al2O3:SiO2:Na2O:ZnO	Zeolite(23%Al, 46%SiO2,13%Na2O, 18%ZnO)	73.52	<2μm	72 h	Seed germination	EC50	>1200	>0.0163220892274211	L. sativa	Plants	-	Cardoso et al., Pol. J. Chem. Tech., Vol. 21, No. 4, 2019	If the MCNM composition is not noted in the MCNM or information tab, composition is based on the stoichiometry
Al2O3:SiO2:Na2O:Co2O3	Zeolite(28%Al, 56%SiO2,6%Na2O, 10%Co2O3)	82.48	<2μm	72 h	Seed germination	EC50	>1200	>0.01454898157129	L. sativa	Plants	-	Cardoso et al., Pol. J. Chem. Tech., Vol. 21, No. 4, 2019	If the MCNM composition is not noted in the MCNM or information tab, composition is based on the stoichiometry
Al2O3:SiO2:Na2O:Li2O	Zeolite(19%Al, 38%SiO2,4%Na2O, 39%Li2O)	56.36	<2μm	72 h	Seed germination	EC50	>1200	>0.021291696238467	L. sativa	Plants	-	Cardoso et al., Pol. J. Chem. Tech., Vol. 21, No. 4, 2019	If the MCNM composition is not noted in the MCNM or information tab, composition is based on the stoichiometry
Gd:Yb2O3 (1%)	Gd doped Yb2O3 (1%)	393.685	16	24 h	growth inhibition assay	IC50	>2000	>0.00508020371616902	E. coli	Bacteria	-	Chaudhary, et al., Ceramics International 45 (2019) 19307–193	If the MCNM composition is not noted in the MCNM or information tab, composition is based on the stoichiometry
Gd:Yb2O3 (2%)	Gd doped Yb2O3 (2%)	393.37	17	24 h	growth inhibition assay	IC50	>2000	>0.0050842718051707	E. coli	Bacteria	-	Chaudhary, et al., Ceramics International 45 (2019) 19307–193	If the MCNM composition is not noted in the MCNM or information tab, composition is based on the stoichiometry
Gd:Yb2O3 (3%)	Gd doped Yb2O3 (3%)	393.055	18.5	24 h	growth inhibition assay	IC50	>2000	>0.00508834641462391	E. coli	Bacteria	-	Chaudhary, et al., Ceramics International 45 (2019) 19307–193	If the MCNM composition is not noted in the MCNM or information tab, composition is based on the stoichiometry
Gd:Yb2O3 (4%)	Gd doped Yb2O3 (4%)	392.74	21	24 h	growth inhibition assay	IC50	>2000	>0.00509242756021796	E. coli	Bacteria	-	Chaudhary, et al., Ceramics International 45 (2019) 19307–193	If the MCNM composition is not noted in the MCNM or information tab, composition is based on the stoichiometry
Gd:Yb2O3 (5%)	Gd doped Yb2O3 (5%)	392.425	26	24 h	growth inhibition assay	IC50	>2000	>0.00509651525769255	E. coli	Bacteria	-	Chaudhary, et al., Ceramics International 45 (2019) 19307–193	If the MCNM composition is not noted in the MCNM or information tab, composition is based on the stoichiometry
Gd:Yb2O3 (1%)	Gd doped Yb2O3 (1%)	393.685	16	24 h	growth inhibition assay	IC50	>2000	>0.00508020371616902	S.aureus	Bacteria	-	Chaudhary, et al., Ceramics International 45 (2019) 19307–193	If the MCNM composition is not noted in the MCNM or information tab, composition is based on the stoichiometry
Gd:Yb2O3 (2%)	Gd doped Yb2O3 (2%)	393.37	17	24 h	growth inhibition assay	IC50	>2000	>0.0050842718051707	S.aureus	Bacteria	-	Chaudhary, et al., Ceramics International 45 (2019) 19307–193	If the MCNM composition is not noted in the MCNM or information tab, composition is based on the stoichiometry
Gd:Yb2O3 (3%)	Gd doped Yb2O3 (3%)	393.055	18.5	24 h	growth inhibition assay	IC50	>2000	>0.00508834641462391	S.aureus	Bacteria	-	Chaudhary, et al., Ceramics International 45 (2019) 19307–193	If the MCNM composition is not noted in the MCNM or information tab, composition is based on the stoichiometry
Gd:Yb2O3 (4%)	Gd doped Yb2O3 (4%)	392.74	21	24 h	growth inhibition assay	IC50	>2000	>0.00509242756021796	S.aureus	Bacteria	-	Chaudhary, et al., Ceramics International 45 (2019) 19307–193	If the MCNM composition is not noted in the MCNM or information tab, composition is based on the stoichiometry
Gd:Yb2O3 (5%)	Gd doped Yb2O3 (5%)	392.425	26	24 h	growth inhibition assay	IC50	>2000	>0.00509651525769255	S.aureus	Bacteria	-	Chaudhary, et al., Ceramics International 45 (2019) 19307–193	If the MCNM composition is not noted in the MCNM or information tab, composition is based on the stoichiometry
Gd:Yb2O3 (1%)	Gd doped Yb2O3 (1%)	393.685	16	24 h	growth inhibition assay	IC50	>2000	>0.00508020371616902	L. taxodii.	Eukaryotes	-	Chaudhary, et al., Ceramics International 45 (2019) 19307–193	If the MCNM composition is not noted in the MCNM or information tab, composition is based on the stoichiometry
Gd:Yb2O3 (2%)	Gd doped Yb2O3 (2%)	393.37	17	24 h	growth inhibition assay	IC50	>2000	>0.0050842718051707	L. taxodii.	Eukaryotes	-	Chaudhary, et al., Ceramics International 45 (2019) 19307–193	If the MCNM composition is not noted in the MCNM or information tab, composition is based on the stoichiometry
Gd:Yb2O3 (3%)	Gd doped Yb2O3 (3%)	393.055	18.5	24 h	growth inhibition assay	IC50	>2000	>0.00508834641462391	L. taxodii.	Eukaryotes	-	Chaudhary, et al., Ceramics International 45 (2019) 19307–193	If the MCNM composition is not noted in the MCNM or information tab, composition is based on the stoichiometry
Gd:Yb2O3 (4%)	Gd doped Yb2O3 (4%)	392.74	21	24 h	growth inhibition assay	IC50	>2000	>0.00509242756021796	L. taxodii.	Eukaryotes	-	Chaudhary, et al., Ceramics International 45 (2019) 19307–193	If the MCNM composition is not noted in the MCNM or information tab, composition is based on the stoichiometry
Gd:Yb2O3 (5%)	Gd doped Yb2O3 (5%)	392.425	26	24 h	growth inhibition assay	IC50	>2000	>0.00509651525769255	L. taxodii.	Eukaryotes	-	Chaudhary, et al., Ceramics International 45 (2019) 19307–193	If the MCNM composition is not noted in the MCNM or information tab, composition is based on the stoichiometry
Gd:Yb2O3 (5%)	Gd doped Yb2O3 (5%)	392.425	26	24 h	Seed germination	IC50	2000	0.00509652	Vigna radiata seeds	Plants	-2.29273	Chaudhary, et al., Ceramics International 45 (2019) 19307–193	If the MCNM composition is not noted in the MCNM or information tab, composition is based on the stoichiometry
Gd:Yb2O3 (5%)	Gd doped Yb2O3 (5%)	392.425	26	24 h	Root length	IC50	>2000	>0.00509651525769255	Vigna radiata seeds	Plants	-	Chaudhary, et al., Ceramics International 45 (2019) 19307–193	If the MCNM composition is not noted in the MCNM or information tab, composition is based on the stoichiometry
CdO:ZnO(90:10)	Nanocomposite: 90%CdO	123.3	-	48 h	Mortality assay	LC50	75	0.000608273	A. salina	Crustacean	-3.2159	Cheemadan et al., Mater. Res. Express 6 (2019) 104009	If the MCNM composition is not noted in the MCNM or information tab, composition is based on the stoichiometry
CdO:ZnO(80:20)	Nanocomposite: 80%CdO	118.6	-	48 h	Mortality assay	LC50	100	0.00084317	A. salina	Crustacean	-3.07408	Cheemadan et al., Mater. Res. Express 6 (2019) 104009	If the MCNM composition is not noted in the MCNM or information tab, composition is based on the stoichiometry
CdO:ZnO(70:30)	Nanocomposite: 70%CdO	113.9	-	48 h	Mortality assay	LC50	100	0.000877963	A. salina	Crustacean	-3.05652	Cheemadan et al., Mater. Res. Express 6 (2019) 104009	If the MCNM composition is not noted in the MCNM or information tab, composition is based on the stoichiometry
CdO:ZnO(60:40)	Nanocomposite: 60%CdO	109.2	-	48 h	Mortality assay	LC50	100	0.000915751	A. salina	Crustacean	-3.03822	Cheemadan et al., Mater. Res. Express 6 (2019) 104009	If the MCNM composition is not noted in the MCNM or information tab, composition is based on the stoichiometry
Cs0.33WO3	Cs doped WO3 (25%)	207.25	60	48 h	Mortality test	LC50	>500	>0.00241254523522316	Danio rerio embryos	Fish	-	Chen et al.,Toxicology Reports 9 (2022) 1120–1129	If the MCNM composition is not noted in the MCNM or information tab, composition is based on the stoichiometry
Cs0.33WO3	Cs doped WO3 (25%)	207.25	60	72 h	Mortality test	LC50	>500	>0.00241254523522316	Danio rerio embryos	Fish	-	Chen et al.,Toxicology Reports 9 (2022) 1120–1129	If the MCNM composition is not noted in the MCNM or information tab, composition is based on the stoichiometry
Cs0.33WO3	Cs doped WO3 (25%)	207.25	60	96 h	Mortality test	LC50	>500	>0.00241254523522316	Danio rerio embryos	Fish	-	Chen et al.,Toxicology Reports 9 (2022) 1120–1129	If the MCNM composition is not noted in the MCNM or information tab, composition is based on the stoichiometry
Cs0.33WO3	Cs doped WO3 (25%)	207.25	90	48 h	Mortality test	LC50	>2000	>0.00965018094089264	Danio rerio embryos	Fish	-	Chen et al.,Toxicology Reports 9 (2022) 1120–1129	If the MCNM composition is not noted in the MCNM or information tab, composition is based on the stoichiometry
Cs0.33WO3	Cs doped WO3 (25%)	207.25	90	72 h	Mortality test	LC50	>2000	>0.00965018094089264	Danio rerio embryos	Fish	-	Chen et al.,Toxicology Reports 9 (2022) 1120–1129	If the MCNM composition is not noted in the MCNM or information tab, composition is based on the stoichiometry
Cs0.33WO3	Cs doped WO3 (25%)	207.25	90	96 h	Mortality test	LC50	>1000	>0.00482509047044632	Danio rerio embryos	Fish	-	Chen et al.,Toxicology Reports 9 (2022) 1120–1129	If the MCNM composition is not noted in the MCNM or information tab, composition is based on the stoichiometry
Cs0.33WO3	Cs doped WO3 (25%)	207.25	140	48 h	Mortality test	LC50	>5000	>0.0241254523522316	Danio rerio embryos	Fish	-	Chen et al.,Toxicology Reports 9 (2022) 1120–1129	If the MCNM composition is not noted in the MCNM or information tab, composition is based on the stoichiometry
Cs0.33WO3	Cs doped WO3 (25%)	207.25	140	72 h	Mortality test	LC50	>5000	>0.0241254523522316	Danio rerio embryos	Fish	-	Chen et al.,Toxicology Reports 9 (2022) 1120–1129	If the MCNM composition is not noted in the MCNM or information tab, composition is based on the stoichiometry
Cs0.33WO3	Cs doped WO3 (25%)	207.25	140	96 h	Mortality test	LC50	>5000	>0.0241254523522316	Danio rerio embryos	Fish	-	Chen et al.,Toxicology Reports 9 (2022) 1120–1129	If the MCNM composition is not noted in the MCNM or information tab, composition is based on the stoichiometry
Cs0.33WO3	Cs doped WO3 (25%)	207.25	60	48 h	Hatching rate	EC50	500	0.00241255	Danio rerio embryos	Fish	-2.61752	Chen et al.,Toxicology Reports 9 (2022) 1120–1129	If the MCNM composition is not noted in the MCNM or information tab, composition is based on the stoichiometry
Cs0.33WO3	Cs doped WO3 (25%)	207.25	60	72 h	Hatching rate	EC50	500	0.00241255	Danio rerio embryos	Fish	-2.61752	Chen et al.,Toxicology Reports 9 (2022) 1120–1129	If the MCNM composition is not noted in the MCNM or information tab, composition is based on the stoichiometry
Cs0.33WO3	Cs doped WO3 (25%)	207.25	60	96 h	Hatching rate	EC50	500	0.00241255	Danio rerio embryos	Fish	-2.61752	Chen et al.,Toxicology Reports 9 (2022) 1120–1129	If the MCNM composition is not noted in the MCNM or information tab, composition is based on the stoichiometry
Cs0.33WO3	Cs doped WO3 (25%)	207.25	90	48 h	Hatching rate	EC50	>500	>0.00241254523522316	Danio rerio embryos	Fish	-	Chen et al.,Toxicology Reports 9 (2022) 1120–1129	If the MCNM composition is not noted in the MCNM or information tab, composition is based on the stoichiometry
Cs0.33WO3	Cs doped WO3 (25%)	207.25	90	72 h	Hatching rate	EC50	>500	>0.00241254523522316	Danio rerio embryos	Fish	-	Chen et al.,Toxicology Reports 9 (2022) 1120–1129	If the MCNM composition is not noted in the MCNM or information tab, composition is based on the stoichiometry
Cs0.33WO3	Cs doped WO3 (25%)	207.25	90	96 h	Hatching rate	EC50	>500	>0.00241254523522316	Danio rerio embryos	Fish	-	Chen et al.,Toxicology Reports 9 (2022) 1120–1129	If the MCNM composition is not noted in the MCNM or information tab, composition is based on the stoichiometry
Cs0.33WO3	Cs doped WO3 (25%)	207.25	140	48 h	Hatching rate	EC50	>1000	>0.00482509047044632	Danio rerio embryos	Fish	-	Chen et al.,Toxicology Reports 9 (2022) 1120–1129	If the MCNM composition is not noted in the MCNM or information tab, composition is based on the stoichiometry
Cs0.33WO3	Cs doped WO3 (25%)	207.25	140	72 h	Hatching rate	EC50	>1000	>0.00482509047044632	Danio rerio embryos	Fish	-	Chen et al.,Toxicology Reports 9 (2022) 1120–1129	If the MCNM composition is not noted in the MCNM or information tab, composition is based on the stoichiometry
Cs0.33WO3	Cs doped WO3 (25%)	207.25	140	96 h	Hatching rate	EC50	>1000	>0.00482509047044632	Danio rerio embryos	Fish	-	Chen et al.,Toxicology Reports 9 (2022) 1120–1129	If the MCNM composition is not noted in the MCNM or information tab, composition is based on the stoichiometry
ZnO/MgO	Nanocomposite: 50% ZnO, 50%MgO	60.85	139	48 h	growth inhibition assay	IC50	625	0.0102712	C. gloeosporioides AP-14	Eukaryotes	-1.98838	De la Rosa-García, Journal of Nanomaterials Volume 2018, Article ID 3498527	If the MCNM composition is not noted in the MCNM or information tab, composition is based on the stoichiometry
ZnO/MgO	Nanocomposite: 50% ZnO, 50%MgO	60.85	161	48 h	growth inhibition assay	IC50	625	0.0102712	C. gloeosporioides AP-14	Eukaryotes	-1.98838	De la Rosa-García, Journal of Nanomaterials Volume 2018, Article ID 3498527	If the MCNM composition is not noted in the MCNM or information tab, composition is based on the stoichiometry
ZnO/MgO	Nanocomposite: 50% ZnO, 50%MgO	60.85	139	48 h	growth inhibition assay	IC50	625	0.0102712	C. gloeosporioides PG-16	Eukaryotes	-1.98838	De la Rosa-García, Journal of Nanomaterials Volume 2018, Article ID 3498527	If the MCNM composition is not noted in the MCNM or information tab, composition is based on the stoichiometry
ZnO/MgO	Nanocomposite: 50% ZnO, 50%MgO	60.85	161	48 h	growth inhibition assay	IC50	625	0.0102712	C. gloeosporioides PG-16	Eukaryotes	-1.98838	De la Rosa-García, Journal of Nanomaterials Volume 2018, Article ID 3498527	If the MCNM composition is not noted in the MCNM or information tab, composition is based on the stoichiometry
Al2O3:SiO2	Nanocomposite:40%SiO2	85.2	--	5 days	Seed germination	EC50	>240	>0.0028169014084507	Vigna radiata	Plants	-	Dey et al., J. Environ. Monit., 2011, 13, 1709	If the MCNM composition is not noted in the MCNM or information tab, composition is based on the stoichiometry
Ni:Al2O3:SiO2	Doped nanocomposite (0.8% Ni)	85.0264	30-45	5 days	Seed germination	EC50	>240	>0.00282265272903475	Vigna radiata	Plants	-	Dey et al., J. Environ. Monit., 2011, 13, 1709	If the MCNM composition is not noted in the MCNM or information tab, composition is based on the stoichiometry
Co:Al2O3:SiO2	Doped nanocomposite (0.8% Co)	84.9904	30	5 days	Seed germination	EC50	>240	>0.00282384834051846	Vigna radiata	Plants	-	Dey et al., J. Environ. Monit., 2011, 13, 1709	If the MCNM composition is not noted in the MCNM or information tab, composition is based on the stoichiometry
Cu:Al2O3:SiO2	Doped nanocomposite (0.8% Cu)	84.9904	30	5 days	Seed germination	EC50	>240	>0.00282384834051846	Vigna radiata	Plants	-	Dey et al., J. Environ. Monit., 2011, 13, 1709	If the MCNM composition is not noted in the MCNM or information tab, composition is based on the stoichiometry
Al2O3:SiO2	Nanocomposite:40%SiO2	85.2	--	10 days	Seed germination	EC50	>240	>0.0028169014084507	Vigna radiata	Plants	-	Dey et al., J. Environ. Monit., 2011, 13, 1709	If the MCNM composition is not noted in the MCNM or information tab, composition is based on the stoichiometry
Ni:Al2O3:SiO2	Doped nanocomposite (0.8% Ni)	85.0264	30-45	10 days	Seed germination	EC50	>240	>0.00282265272903475	Vigna radiata	Plants	-	Dey et al., J. Environ. Monit., 2011, 13, 1709	If the MCNM composition is not noted in the MCNM or information tab, composition is based on the stoichiometry
Co:Al2O3:SiO2	Doped nanocomposite (0.8% Co)	84.9904	30	10 days	Seed germination	EC50	>240	>0.00282384834051846	Vigna radiata	Plants	-	Dey et al., J. Environ. Monit., 2011, 13, 1709	If the MCNM composition is not noted in the MCNM or information tab, composition is based on the stoichiometry
Cu:Al2O3:SiO2	Doped nanocomposite (0.8% Cu)	84.9904	30	10 days	Seed germination	EC50	>240	>0.00282384834051846	Vigna radiata	Plants	-	Dey et al., J. Environ. Monit., 2011, 13, 1709	If the MCNM composition is not noted in the MCNM or information tab, composition is based on the stoichiometry
Ag0.1Ni0.4Co0.5Fe2O4	composite ferrite	238.3	19.19	24 h	growth inhibition assay	IC50	100	0.000419639	C. albicans	Eukaryotes	-3.37712	Dhanda et al. Journal of Magnetism and Magnetic Materials 572 (2023) 170598	If the MCNM composition is not noted in the MCNM or information tab, composition is based on the stoichiometry
Ag0.2Ni0.4Co0.4Fe2O4	composite ferrite	241.6	19.93	24 h	growth inhibition assay	IC50	100	0.000413907	C. albicans	Eukaryotes	-3.3831	Dhanda et al. Journal of Magnetism and Magnetic Materials 572 (2023) 170598	If the MCNM composition is not noted in the MCNM or information tab, composition is based on the stoichiometry
Ag0.3Ni0.4Co0.3Fe2O4	composite ferrite	244.9	20.69	24 h	growth inhibition assay	IC50	100	0.00040833	C. albicans	Eukaryotes	-3.38899	Dhanda et al. Journal of Magnetism and Magnetic Materials 572 (2023) 170598	If the MCNM composition is not noted in the MCNM or information tab, composition is based on the stoichiometry
Ag0.4Ni0.4Co0.2Fe2O4	composite ferrite	248.2	20.88	24 h	growth inhibition assay	IC50	100	0.000402901	C. albicans	Eukaryotes	-3.3948	Dhanda et al. Journal of Magnetism and Magnetic Materials 572 (2023) 170598	If the MCNM composition is not noted in the MCNM or information tab, composition is based on the stoichiometry
Ag0.5Ni0.4Co0.1Fe2O4	composite ferrite	251.5	20.96	24 h	growth inhibition assay	IC50	100	0.000397614	C. albicans	Eukaryotes	-3.40054	Dhanda et al. Journal of Magnetism and Magnetic Materials 572 (2023) 170598	If the MCNM composition is not noted in the MCNM or information tab, composition is based on the stoichiometry
Ag0.6Ni0.4Fe2O4	composite ferrite	254.8	21.01	24 h	growth inhibition assay	IC50	100	0.000392465	C. albicans	Eukaryotes	-3.4062	Dhanda et al. Journal of Magnetism and Magnetic Materials 572 (2023) 170598	If the MCNM composition is not noted in the MCNM or information tab, composition is based on the stoichiometry
Fe-Ca-ZrO	Fe-Ca-Zr OXIDE (40% Fe, 20% Ca, 40%Zr)	82.82	-	6 h	UV spectrophotometric assay	IC50	25	0.000301859	E. Coli	Bacteria	-3.5202	Dhillon et al., Journal of Colloid and Interface Science 457 (2015) 289–297	If the MCNM composition is not noted in the MCNM or information tab, composition is based on the stoichiometry
Cd:MnO2	Cd doped MnO2 (16.67% on surface)	91.1675	20	48 h	Acute toxicity assay	LC50	1.26	1.38207e-05	Daphnia magna	Crustacean	-4.85947	Gao et al., Ecotoxicology and Environmental Safety 148 (2018) 261–2	If the MCNM composition is not noted in the MCNM or information tab, composition is based on the stoichiometry
Ag:TiO2	Ag doped TiO2 (1%)	80.28	10	24 h	Seediling length	EC50	>500	>0.00622820129546587	A. thaliana	Plants	-	Garcidueñas-Pina et al., International Journal of Photoenergy Volume 2016, Article ID 8060847	If the MCNM composition is not noted in the MCNM or information tab, composition is based on the stoichiometry
Cu:TiO2	Cu doped TiO2 (1%)	79.835	10	24 h	Seediling length	EC50	>500	>0.0062629172668629	A. thaliana	Plants	-	Garcidueñas-Pina et al., International Journal of Photoenergy Volume 2016, Article ID 8060847	If the MCNM composition is not noted in the MCNM or information tab, composition is based on the stoichiometry
Cu:TiO2	Cu doped TiO2 (1%)	79.835	10	7 days	Seediling length	EC50	>500	>0.0062629172668629	A. thaliana	Plants	-	Garcidueñas-Pina et al., International Journal of Photoenergy Volume 2016, Article ID 8060847	If the MCNM composition is not noted in the MCNM or information tab, composition is based on the stoichiometry
Cr:TiO2	Cr doped TiO2 (5%)	78.6	5.8	2 h	bactericidal assay	EC50	>200	>0.00254452926208651	E. Coli	Bacteria	-	Gomez-Polo et al., Surfaces and Interfaces 22 (2021) 100867	If the MCNM composition is not noted in the MCNM or information tab, composition is based on the stoichiometry
Cr:TiO2	Cr doped TiO2 (5%)	78.6	5.8	4 h	bactericidal assay	EC50	>200	>0.00254452926208651	E. Coli	Bacteria	-	Gomez-Polo et al., Surfaces and Interfaces 22 (2021) 100867	If the MCNM composition is not noted in the MCNM or information tab, composition is based on the stoichiometry
Cr:TiO2	Cr doped TiO2 (5%)	78.6	5.8	6 h	bactericidal assay	EC50	>200	>0.00254452926208651	E. Coli	Bacteria	-	Gomez-Polo et al., Surfaces and Interfaces 22 (2021) 100867	If the MCNM composition is not noted in the MCNM or information tab, composition is based on the stoichiometry
Cr:TiO2	Cr doped TiO2 (5%)	78.6	5.8	8 h	bactericidal assay	EC50	>200	>0.00254452926208651	E. Coli	Bacteria	-	Gomez-Polo et al., Surfaces and Interfaces 22 (2021) 100867	If the MCNM composition is not noted in the MCNM or information tab, composition is based on the stoichiometry
Ag:TiO2	Ag doped TiO2 (3%)	80.84	7.3	3 days	Seed germination	EC50	>2500	>0.0309252845126175	Spinach seeds	Plants	-	Gordillo-Delgado et al, PLoS ONE 15(12): e0244511. https://doi.org/10.1371/journal.pone.0244511	If the MCNM composition is not noted in the MCNM or information tab, composition is based on the stoichiometry
Ag:TiO2	Ag doped TiO2 (3%)	80.84	8.3	3 days	Seed germination	EC50	>2500	>0.0309252845126175	Spinach seeds	Plants	-	Gordillo-Delgado et al, PLoS ONE 15(12): e0244511. https://doi.org/10.1371/journal.pone.0244511	If the MCNM composition is not noted in the MCNM or information tab, composition is based on the stoichiometry
Ag:TiO2	Ag doped TiO2 (3%)	80.84	10.9	3 days	Seed germination	EC50	>2500	>0.0309252845126175	Spinach seeds	Plants	-	Gordillo-Delgado et al, PLoS ONE 15(12): e0244511. https://doi.org/10.1371/journal.pone.0244511	If the MCNM composition is not noted in the MCNM or information tab, composition is based on the stoichiometry
Ag:TiO2	Ag doped TiO2 (3%)	80.84	26	3 days	Seed germination	EC50	>2500	>0.0309252845126175	Spinach seeds	Plants	-	Gordillo-Delgado et al, PLoS ONE 15(12): e0244511. https://doi.org/10.1371/journal.pone.0244511	If the MCNM composition is not noted in the MCNM or information tab, composition is based on the stoichiometry
Ta-ZnO	Ta-ZnO (1%Ta)	82	10--60	4 h	growth inhibition assay	IC50	200	0.00243902	B. subtilis	Bacteria	-2.61278	Guo et al. Nanoscale Research Letters (2015) 10:336	If the MCNM composition is not noted in the MCNM or information tab, composition is based on the stoichiometry
Ta-ZnO	Ta-ZnO (3%Ta)	84	10--60	4 h	growth inhibition assay	IC50	200	0.00238095	B. subtilis	Bacteria	-2.62325	Guo et al. Nanoscale Research Letters (2015) 10:336	If the MCNM composition is not noted in the MCNM or information tab, composition is based on the stoichiometry
Ta-ZnO	Ta-ZnO (5%Ta)	86	10--60	4 h	growth inhibition assay	IC50	200	0.00232558	B. subtilis	Bacteria	-2.63347	Guo et al. Nanoscale Research Letters (2015) 10:336	If the MCNM composition is not noted in the MCNM or information tab, composition is based on the stoichiometry
Ta-ZnO	Ta-ZnO (1%Ta)	82	10--60	4 h	growth inhibition assay	IC50	200	0.00243902	E.Coli	Bacteria	-2.61278	Guo et al. Nanoscale Research Letters (2015) 10:336	If the MCNM composition is not noted in the MCNM or information tab, composition is based on the stoichiometry
Ta-ZnO	Ta-ZnO (3%Ta)	84	10--60	4 h	growth inhibition assay	IC50	200	0.00238095	E.Coli	Bacteria	-2.62325	Guo et al. Nanoscale Research Letters (2015) 10:336	If the MCNM composition is not noted in the MCNM or information tab, composition is based on the stoichiometry
Ta-ZnO	Ta-ZnO (5%Ta)	86	10--60	4 h	growth inhibition assay	IC50	200	0.00232558	E.Coli	Bacteria	-2.63347	Guo et al. Nanoscale Research Letters (2015) 10:336	If the MCNM composition is not noted in the MCNM or information tab, composition is based on the stoichiometry
Ta-ZnO	Ta-ZnO (1%Ta)	82	10--60	4 h	growth inhibition assay	IC50	200	0.00243902	P. aureginosa	Bacteria	-2.61278	Guo et al. Nanoscale Research Letters (2015) 10:336	If the MCNM composition is not noted in the MCNM or information tab, composition is based on the stoichiometry
Ta-ZnO	Ta-ZnO (3%Ta)	84	10--60	4 h	growth inhibition assay	IC50	200	0.00238095	P. aureginosa	Bacteria	-2.62325	Guo et al. Nanoscale Research Letters (2015) 10:336	If the MCNM composition is not noted in the MCNM or information tab, composition is based on the stoichiometry
Ta-ZnO	Ta-ZnO (5%Ta)	86	10--60	4 h	growth inhibition assay	IC50	200	0.00232558	P. aureginosa	Bacteria	-2.63347	Guo et al. Nanoscale Research Letters (2015) 10:336	If the MCNM composition is not noted in the MCNM or information tab, composition is based on the stoichiometry
Ta-ZnO	Ta-ZnO (1%Ta)	82	10--60	4 h	growth inhibition assay	IC50	200	0.00243902	S. aureus	Bacteria	-2.61278	Guo et al. Nanoscale Research Letters (2015) 10:336	If the MCNM composition is not noted in the MCNM or information tab, composition is based on the stoichiometry
Ta-ZnO	Ta-ZnO (3%Ta)	84	10--60	4 h	growth inhibition assay	IC50	200	0.00238095	S. aureus	Bacteria	-2.62325	Guo et al. Nanoscale Research Letters (2015) 10:336	If the MCNM composition is not noted in the MCNM or information tab, composition is based on the stoichiometry
Ta-ZnO	Ta-ZnO (5%Ta)	86	10--60	4 h	growth inhibition assay	IC50	200	0.00232558	S. aureus	Bacteria	-2.63347	Guo et al. Nanoscale Research Letters (2015) 10:336	If the MCNM composition is not noted in the MCNM or information tab, composition is based on the stoichiometry
Mg:ZnO(1.87%)	Mg doped ZnO (1.87%)	80.2333	31	24 h	growth inhibition assay	IC50	100	0.00124637	C. albicans	Eukaryotes	-2.90435	Haja Hameed et al. / Materials Science and Engineering C 52 (2015) 171–177	If the MCNM composition is not noted in the MCNM or information tab, composition is based on the stoichiometry
Mg:ZnO(1.87%)	Mg doped ZnO (1.87%)	80.2333	31	48 h	growth inhibition assay	IC50	100	0.00124637	C. albicans	Eukaryotes	-2.90435	Haja Hameed et al. / Materials Science and Engineering C 52 (2015) 171–177	If the MCNM composition is not noted in the MCNM or information tab, composition is based on the stoichiometry
Ag:ZnO (1% Ag)	Ag doped ZnO (1%)	81.27	35.3	24 h	Mortality assay	LC50	48.21	0.000593208	A. salina	Crustacean	-3.22679	Hameed et al., 2019, NANOMEDICINE, VOL. 14, NO. 6	If the MCNM composition is not noted in the MCNM or information tab, composition is based on the stoichiometry
Ag:ZnO (1% Ag)	Ag doped ZnO (1%)	81.27	35.3	72 h	Mortality assay	LC50	246	0.00302695	L. tropica	Eukaryotes	-2.519	Hameed et al., 2019, NANOMEDICINE, VOL. 14, NO. 6	If the MCNM composition is not noted in the MCNM or information tab, composition is based on the stoichiometry
CeO2:Bi2O3	Composite oxide equimolar	319	2	96 h	Mortality test	LC50		2.5757e-05	Danio rerio	Fish	-4.5891	Henych et al., ACS Appl.NanoMater.2022,5, 17956−17968	If the MCNM composition is not noted in the MCNM or information tab, composition is based on the stoichiometry
CeO2:Bi2O3	Composite oxide equimolar	319	2	72 h	Mortality test	LC50		2.5757e-05	Danio rerio	Fish	-4.5891	Henych et al., ACS Appl.NanoMater.2022,5, 17956−17968	If the MCNM composition is not noted in the MCNM or information tab, composition is based on the stoichiometry
Eu:TiO2	Eu doped TiO2 (5%)	83.6	10	48 h	Immobilization	EC50	>100	>0.00119617224880383	Daphnia magna	Crustacean	-	Hund-Rinke et al., NanoImpact 9 (2018) 52	If the MCNM composition is not noted in the MCNM or information tab, composition is based on the stoichiometry							0.00119617
Eu:CeO2	Eu doped CeO2 (5%)	171	12	48 h	Immobilization	EC50	>100	>0.000584795321637427	Daphnia magna	Crustacean	-	Hund-Rinke et al., NanoImpact 9 (2018) 52	If the MCNM composition is not noted in the MCNM or information tab, composition is based on the stoichiometry							0.000584795
Fe:TiO2	Fe doped TiO2 (5%)	78.8	23	48 h	Immobilization	EC50	>100	>0.00126903553299492	Daphnia magna	Crustacean	-	Hund-Rinke et al., NanoImpact 9 (2018) 52	If the MCNM composition is not noted in the MCNM or information tab, composition is based on the stoichiometry							0.00126904
Eu:TiO2	Eu doped TiO2 (5%)	83.6	10	96 h	Embryo Hatching assay	LC50	>100	>0.00119617224880383	Danio rerio	Fish	-	Hund-Rinke et al., NanoImpact 9 (2018) 52	If the MCNM composition is not noted in the MCNM or information tab, composition is based on the stoichiometry
Eu:CeO2	Eu doped CeO2 (5%)	171	12	96 h	Embryo Hatching assay	LC50	>100	>0.000584795321637427	Danio rerio	Fish	-	Hund-Rinke et al., NanoImpact 9 (2018) 52	If the MCNM composition is not noted in the MCNM or information tab, composition is based on the stoichiometry
Fe:TiO2	Fe doped TiO2 (5%)	78.8	23	96 h	Embryo Hatching assay	LC50	>100	>0.00126903553299492	Danio rerio	Fish	-	Hund-Rinke et al., NanoImpact 9 (2018) 52	If the MCNM composition is not noted in the MCNM or information tab, composition is based on the stoichiometry
Fe2O3-ZnO	Core/shell Fe2O3/ZnO spindle 5% Fe2O3	85.33	1000	24 h	Colony counting assay	IC50	52	0.000609399	S. aureus	Bacteria	-3.2151	Jana, et al. Colloids and Surfaces B: Biointerfaces 177 (2019) 512–519	If the MCNM composition is not noted in the MCNM or information tab, composition is based on the stoichiometry
Fe2O3-ZnO	Core/shell Fe2O3/ZnO spheres 3.5% Fe2O3	84.151	100	24 h	Colony counting assay	IC50	45	0.000534753	S. aureus	Bacteria	-3.27185	Jana, et al. Colloids and Surfaces B: Biointerfaces 177 (2019) 512–519	If the MCNM composition is not noted in the MCNM or information tab, composition is based on the stoichiometry
Fe2O3-ZnO	Core/shell Fe2O3/ZnO rods 4.5% Fe2O3	84.937	200	24 h	Colony counting assay	IC50	37	0.000435617	S. aureus	Bacteria	-3.3609	Jana, et al. Colloids and Surfaces B: Biointerfaces 177 (2019) 512–519	If the MCNM composition is not noted in the MCNM or information tab, composition is based on the stoichiometry
Fe2O3-ZnO	Core/shell Fe2O3/ZnO discs 3% Fe2O3	83.758	1000	24 h	Colony counting assay	IC50	60	0.000716349	S. aureus	Bacteria	-3.14488	Jana, et al. Colloids and Surfaces B: Biointerfaces 177 (2019) 512–519	If the MCNM composition is not noted in the MCNM or information tab, composition is based on the stoichiometry
Fe2O3-ZnO	Core/shell Fe2O3/ZnO spindle 5% Fe2O3	85.33	1000	24 h	Colony counting assay	IC50	47	0.000550803	V. cholerae (Tolerant phenotype)	Bacteria	-3.259	Jana, et al. Colloids and Surfaces B: Biointerfaces 177 (2019) 512–519	If the MCNM composition is not noted in the MCNM or information tab, composition is based on the stoichiometry
Fe2O3-ZnO	Core/shell Fe2O3/ZnO spheres 3.5% Fe2O3	84.151	100	24 h	Colony counting assay	IC50	100	0.00118834	V. cholerae (Tolerant phenotype)	Bacteria	-2.92506	Jana, et al. Colloids and Surfaces B: Biointerfaces 177 (2019) 512–519	If the MCNM composition is not noted in the MCNM or information tab, composition is based on the stoichiometry
Fe2O3-ZnO	Core/shell Fe2O3/ZnO rods 4.5% Fe2O3	84.937	200	24 h	Colony counting assay	IC50	93	0.00109493	V. cholerae (Tolerant phenotype)	Bacteria	-2.96061	Jana, et al. Colloids and Surfaces B: Biointerfaces 177 (2019) 512–519	If the MCNM composition is not noted in the MCNM or information tab, composition is based on the stoichiometry
Fe2O3-ZnO	Core/shell Fe2O3/ZnO discs 3% Fe2O3	83.758	1000	24 h	Colony counting assay	IC50	74	0.000883498	V. cholerae (Tolerant phenotype)	Bacteria	-3.05379	Jana, et al. Colloids and Surfaces B: Biointerfaces 177 (2019) 512–519	If the MCNM composition is not noted in the MCNM or information tab, composition is based on the stoichiometry
Fe2O3-ZnO	Core/shell Fe2O3/ZnO spindle 5% Fe2O3	85.33	1000	24 h	Colony counting assay	IC50	30	0.000351576	V. cholerae (Vulnerable phenotype)	Bacteria	-3.45398	Jana, et al. Colloids and Surfaces B: Biointerfaces 177 (2019) 512–519	If the MCNM composition is not noted in the MCNM or information tab, composition is based on the stoichiometry
Fe2O3-ZnO	Core/shell Fe2O3/ZnO spheres 3.5% Fe2O3	84.151	100	24 h	Colony counting assay	IC50	70	0.000831838	V. cholerae (Vulnerable phenotype)	Bacteria	-3.07996	Jana, et al. Colloids and Surfaces B: Biointerfaces 177 (2019) 512–519	If the MCNM composition is not noted in the MCNM or information tab, composition is based on the stoichiometry
Fe2O3-ZnO	Core/shell Fe2O3/ZnO rods 4.5% Fe2O3	84.937	200	24 h	Colony counting assay	IC50	57	0.000671086	V. cholerae (Vulnerable phenotype)	Bacteria	-3.17322	Jana, et al. Colloids and Surfaces B: Biointerfaces 177 (2019) 512–519	If the MCNM composition is not noted in the MCNM or information tab, composition is based on the stoichiometry
Fe2O3-ZnO	Core/shell Fe2O3/ZnO discs 3% Fe2O3	83.758	1000	24 h	Colony counting assay	IC50	65	0.000776045	V. cholerae (Vulnerable phenotype)	Bacteria	-3.11011	Jana, et al. Colloids and Surfaces B: Biointerfaces 177 (2019) 512–519	If the MCNM composition is not noted in the MCNM or information tab, composition is based on the stoichiometry
Ag:Fe3o4	Ag doped Fe3O4 (31%)	193.56	12--18	24 h	bioluminescence inhibition	IC50	221	0.00114176	Vibrio fischeri	Bacteria	-2.94242	Klekotka et al., Chemosphere 308 (2022) 136207	If the MCNM composition is not noted in the MCNM or information tab, composition is based on the stoichiometry
Ag:Fe3o4	Ag doped Fe3O4 (16%)	212.16	12--18	24 h	bioluminescence inhibition	IC50	477	0.0022483	Vibrio fischeri	Bacteria	-2.64815	Klekotka et al., Chemosphere 308 (2022) 136207	If the MCNM composition is not noted in the MCNM or information tab, composition is based on the stoichiometry
Ag:Fe3o4	Ag doped Fe3O4 (31%)	193.56	12--18	48 h	Acute toxicity assay	LC50	5	2.58318e-05	Heterocypris incongruens	Crustacean	-4.58785	Klekotka et al., Chemosphere 308 (2022) 136207	If the MCNM composition is not noted in the MCNM or information tab, composition is based on the stoichiometry
Ag:Fe3o4	Ag doped Fe3O4 (16%)	212.16	12--18	48 h	Acute toxicity assay	LC50	10	4.71342e-05	Heterocypris incongruens	Crustacean	-4.32666	Klekotka et al., Chemosphere 308 (2022) 136207	If the MCNM composition is not noted in the MCNM or information tab, composition is based on the stoichiometry
Ag:Fe3o4	Ag doped Fe3O4 (31%)	193.56	12--18	14 days	Shoot growth inhibition	EC50	1304	0.00673693	Avena sativa	Plants	-2.17154	Klekotka et al., Chemosphere 308 (2022) 136207	If the MCNM composition is not noted in the MCNM or information tab, composition is based on the stoichiometry
Ag:Fe3o4	Ag doped Fe3O4 (16%)	212.16	12--18	14 days	Shoot growth inhibition	EC50	4877	0.0229874	Avena sativa	Plants	-1.63851	Klekotka et al., Chemosphere 308 (2022) 136207	If the MCNM composition is not noted in the MCNM or information tab, composition is based on the stoichiometry
Ag:Fe3o4	Ag doped Fe3O4 (31%)	193.56	12--18	14 days	Root growth inhibition	EC50	908	0.00469105	Avena sativa	Plants	-2.32873	Klekotka et al., Chemosphere 308 (2022) 136207	If the MCNM composition is not noted in the MCNM or information tab, composition is based on the stoichiometry
Ag:Fe3o4	Ag doped Fe3O4 (16%)	212.16	12--18	14 days	Root growth inhibition	EC50	2501	0.0117883	Avena sativa	Plants	-1.92855	Klekotka et al., Chemosphere 308 (2022) 136207	If the MCNM composition is not noted in the MCNM or information tab, composition is based on the stoichiometry
Ag:Fe3o4	Ag doped Fe3O4 (31%)	193.56	12--18	14 days	Fresh matter growth inhibition	EC50	908	0.00469105	Avena sativa	Plants	-2.32873	Klekotka et al., Chemosphere 308 (2022) 136207	If the MCNM composition is not noted in the MCNM or information tab, composition is based on the stoichiometry
Ag:Fe3o4	Ag doped Fe3O4 (16%)	212.16	12--18	14 days	Fresh matter growth inhibition	EC50	250	0.00117836	Avena sativa	Plants	-2.92872	Klekotka et al., Chemosphere 308 (2022) 136207	If the MCNM composition is not noted in the MCNM or information tab, composition is based on the stoichiometry
Ag:Fe3o4	Ag doped Fe3O4 (31%)	193.56	12--18	14 days	Shoot growth inhibition	EC50	836	0.00431907	Raphanus sativus	Plants	-2.36461	Klekotka et al., Chemosphere 308 (2022) 136207	If the MCNM composition is not noted in the MCNM or information tab, composition is based on the stoichiometry
Ag:Fe3o4	Ag doped Fe3O4 (16%)	212.16	12--18	14 days	Shoot growth inhibition	EC50	3241	0.0152762	Raphanus sativus	Plants	-1.81598	Klekotka et al., Chemosphere 308 (2022) 136207	If the MCNM composition is not noted in the MCNM or information tab, composition is based on the stoichiometry
Ag:Fe3o4	Ag doped Fe3O4 (31%)	193.56	12--18	14 days	Root growth inhibition	EC50	879	0.00454123	Raphanus sativus	Plants	-2.34283	Klekotka et al., Chemosphere 308 (2022) 136207	If the MCNM composition is not noted in the MCNM or information tab, composition is based on the stoichiometry
Ag:Fe3o4	Ag doped Fe3O4 (16%)	212.16	12--18	14 days	Root growth inhibition	EC50	1822	0.00858786	Raphanus sativus	Plants	-2.06612	Klekotka et al., Chemosphere 308 (2022) 136207	If the MCNM composition is not noted in the MCNM or information tab, composition is based on the stoichiometry
Ag:Fe3o4	Ag doped Fe3O4 (31%)	193.56	12--18	14 days	Fresh matter growth inhibition	EC50	573	0.00296032	Raphanus sativus	Plants	-2.52866	Klekotka et al., Chemosphere 308 (2022) 136207	If the MCNM composition is not noted in the MCNM or information tab, composition is based on the stoichiometry
Ag:Fe3o4	Ag doped Fe3O4 (16%)	212.16	12--18	14 days	Fresh matter growth inhibition	EC50	4753	0.0224029	Raphanus sativus	Plants	-1.6497	Klekotka et al., Chemosphere 308 (2022) 136207	If the MCNM composition is not noted in the MCNM or information tab, composition is based on the stoichiometry
ZnO:Fe2O3	Nanocomposite (75% ZnO)	100.75	45	15 min	bioluminescence inhibition	IC50	310	0.00307692	Vibrio fischeri	Bacteria	-2.51188	Koba-Ucunet al., Molecules 2021, 26(2), 395	If the MCNM composition is not noted in the MCNM or information tab, composition is based on the stoichiometry
ZnO:Fe2O3	Nanocomposite (75% ZnO)	100.75	45	30 min	bioluminescence inhibition	IC50	110	0.00109181	Vibrio fischeri	Bacteria	-2.96185	Koba-Ucunet al., Molecules 2021, 26(2), 395	If the MCNM composition is not noted in the MCNM or information tab, composition is based on the stoichiometry
ZnO:Fe2O3	Nanocomposite (75% ZnO)	100.75	45	24 h	Acute toxicity assay	LC50	170	0.00168734	Daphnia magna	Crustacean	-2.7728	Koba-Ucunet al., Molecules 2021, 26(2), 395	If the MCNM composition is not noted in the MCNM or information tab, composition is based on the stoichiometry
ZnO:Fe2O3	Nanocomposite (75% ZnO)	100.75	45	48 h	Acute toxicity assay	LC50	100	0.000992556	Daphnia magna	Crustacean	-3.00325	Koba-Ucunet al., Molecules 2021, 26(2), 395	If the MCNM composition is not noted in the MCNM or information tab, composition is based on the stoichiometry
ZnO:Fe2O3	Nanocomposite (75% ZnO)	100.75	45	72 h	growth inhibition assay	EC50	810	0.0080397	Spirodela polyrhiza	Plants	-2.09476	Koba-Ucunet al., Molecules 2021, 26(2), 395	If the MCNM composition is not noted in the MCNM or information tab, composition is based on the stoichiometry
BaFe12O19		1111	-	48 h	Acute toxicity test	LC50	>1600	>0.00144014401440144	Danio rerio	Fish	-	Kovrižnych et al., Interdiscip Toxicol. 2013; Vol. 6(2): 67–73. doi: 10.2478/intox-2013-0012	If the MCNM composition is not noted in the MCNM or information tab, composition is based on the stoichiometry
CuZnFe2O4		305	-	48 h	Acute toxicity test	LC50	390	0.00127869	Danio rerio	Fish	-2.89324	Kovrižnych et al., Interdiscip Toxicol. 2013; Vol. 6(2): 67–73. doi: 10.2478/intox-2013-0012	If the MCNM composition is not noted in the MCNM or information tab, composition is based on the stoichiometry
NiFe2O4		234	-	48 h	Acute toxicity test	LC50	>1600.0	>0.00683760683760684	Danio rerio	Fish	-	Kovrižnych et al., Interdiscip Toxicol. 2013; Vol. 6(2): 67–73. doi: 10.2478/intox-2013-0012	If the MCNM composition is not noted in the MCNM or information tab, composition is based on the stoichiometry
BaFe12O19		1111	-	48 h	Acute toxicity test	LC50	>1600.0	>0.00144014401440144	Danio rerio embryos	Fish	-	Kovrižnych et al., Interdiscip Toxicol. 2013; Vol. 6(2): 67–73. doi: 10.2478/intox-2013-0012	If the MCNM composition is not noted in the MCNM or information tab, composition is based on the stoichiometry
NiFe2O4		234	-	48 h	Acute toxicity test	LC50	>1600.0	>0.00683760683760684	Danio rerio embryos	Fish	-	Kovrižnych et al., Interdiscip Toxicol. 2013; Vol. 6(2): 67–73. doi: 10.2478/intox-2013-0012	If the MCNM composition is not noted in the MCNM or information tab, composition is based on the stoichiometry
BaFe12O19		1111	-	96 h	Acute toxicity test	LC50	>1600.0	>0.00144014401440144	Danio rerio	Fish	-	Kovrižnych et al., Interdiscip Toxicol. 2013; Vol. 6(2): 67–73. doi: 10.2478/intox-2013-0012	If the MCNM composition is not noted in the MCNM or information tab, composition is based on the stoichiometry
CuZnFe2O4		305	-	96 h	Acute toxicity test	LC50	320	0.00104918	Danio rerio	Fish	-2.97915	Kovrižnych et al., Interdiscip Toxicol. 2013; Vol. 6(2): 67–73. doi: 10.2478/intox-2013-0012	If the MCNM composition is not noted in the MCNM or information tab, composition is based on the stoichiometry
NiFe2O4		234	-	96 h	Acute toxicity test	LC50	>1600.0	>0.00683760683760684	Danio rerio	Fish	-	Kovrižnych et al., Interdiscip Toxicol. 2013; Vol. 6(2): 67–73. doi: 10.2478/intox-2013-0012	If the MCNM composition is not noted in the MCNM or information tab, composition is based on the stoichiometry
BaFe12O19		1111	-	96 h	Acute toxicity test	LC50	>1600.0	>0.00144014401440144	Danio rerio embryos	Fish	-	Kovrižnych et al., Interdiscip Toxicol. 2013; Vol. 6(2): 67–73. doi: 10.2478/intox-2013-0012	If the MCNM composition is not noted in the MCNM or information tab, composition is based on the stoichiometry
CuZnFe2O4		305	-	96 h	Acute toxicity test	LC50	260	0.000852459	Danio rerio embryos	Fish	-3.06933	Kovrižnych et al., Interdiscip Toxicol. 2013; Vol. 6(2): 67–73. doi: 10.2478/intox-2013-0012	If the MCNM composition is not noted in the MCNM or information tab, composition is based on the stoichiometry
NiFe2O4		234	-	96 h	Acute toxicity test	LC50	>1600.0	>0.00683760683760684	Danio rerio embryos	Fish	-	Kovrižnych et al., Interdiscip Toxicol. 2013; Vol. 6(2): 67–73. doi: 10.2478/intox-2013-0012	If the MCNM composition is not noted in the MCNM or information tab, composition is based on the stoichiometry
Ag SiO2	SiO2 w Ag NPs on surface (Ag content~10%, XPS)	64.8	270-350 w 12.5 nm AgNPs	24 h	Cell viability colorimetric assay	EC50	32.724	0.000505	B.subtilis	Bacteria	-3.29671	Krakor et al., J Am Ceram Soc. 2022;105:1685 –1696	If the MCNM composition is not noted in the MCNM or information tab, composition is based on the stoichiometry
Ag SiO2	SiO2 w Ag NPs on surface (Ag content~10%, XPS)	64.8	270-350 w 12.5 nm AgNPs	6 h	Cell viability colorimetric assay	EC50	14.256	0.00022	B.subtilis	Bacteria	-3.65758	Krakor et al., J Am Ceram Soc. 2022;105:1685 –1696	If the MCNM composition is not noted in the MCNM or information tab, composition is based on the stoichiometry
CuSiO2	SiO2 w Cu NPs on surface (Cu content~1.3%, XPS)	60.0455	270-350 w 5.8 nm CuNPs	24 h	Cell viability colorimetric assay	EC50	69.0523	0.00115	B.subtilis	Bacteria	-2.9393	Krakor et al., J Am Ceram Soc. 2022;105:1685 –1696	If the MCNM composition is not noted in the MCNM or information tab, composition is based on the stoichiometry
CuSiO2	SiO2 w Cu NPs on surface (Cu content~1.3%, XPS)	60.0455	270-350 w 5.8 nm CuNPs	6 h	Cell viability colorimetric assay	EC50	60.0455	0.001	B.subtilis	Bacteria	-3	Krakor et al., J Am Ceram Soc. 2022;105:1685 –1696	If the MCNM composition is not noted in the MCNM or information tab, composition is based on the stoichiometry
ZnSiO2	SiO2 w ZnO NPs on surface (Zn content~30%, XPS)	66.3	270-350 w 5-15 nm ZnONPs	24 h	Cell viability colorimetric assay	EC50	108.732	0.00164	B.subtilis	Bacteria	-2.78516	Krakor et al., J Am Ceram Soc. 2022;105:1685 –1696	If the MCNM composition is not noted in the MCNM or information tab, composition is based on the stoichiometry
ZnSiO2	SiO2 w ZnO NPs on surface (Zn content~30%, XPS)	66.3	270-350 w 5-15 nm ZnONPs	6 h	Cell viability colorimetric assay	EC50	141.219	0.00213	B.subtilis	Bacteria	-2.67162	Krakor et al., J Am Ceram Soc. 2022;105:1685 –1696	If the MCNM composition is not noted in the MCNM or information tab, composition is based on the stoichiometry
Ag SiO2	SiO2 w Ag NPs on surface (Ag content~10%, XPS)	64.8	270-350 w 12.5 nm AgNPs	24 h	Cell viability colorimetric assay	EC50	11.664	0.00018	E. Coli	Bacteria	-3.74473	Krakor et al., J Am Ceram Soc. 2022;105:1685 –1696	If the MCNM composition is not noted in the MCNM or information tab, composition is based on the stoichiometry
Ag SiO2	SiO2 w Ag NPs on surface (Ag content~10%, XPS)	64.8	270-350 w 12.5 nm AgNPs	6 h	Cell viability colorimetric assay	EC50	29.16	0.00045	E. Coli	Bacteria	-3.34679	Krakor et al., J Am Ceram Soc. 2022;105:1685 –1696	If the MCNM composition is not noted in the MCNM or information tab, composition is based on the stoichiometry
CuSiO2	SiO2 w Cu NPs on surface (Cu content~1.3%, XPS)	60.0455	270-350 w 5.8 nm CuNPs	24 h	Cell viability colorimetric assay	EC50	28.2214	0.00047	E. Coli	Bacteria	-3.3279	Krakor et al., J Am Ceram Soc. 2022;105:1685 –1696	If the MCNM composition is not noted in the MCNM or information tab, composition is based on the stoichiometry
CuSiO2	SiO2 w Cu NPs on surface (Cu content~1.3%, XPS)	60.0455	270-350 w 5.8 nm CuNPs	6 h	Cell viability colorimetric assay	EC50	87.066	0.00145	E. Coli	Bacteria	-2.83863	Krakor et al., J Am Ceram Soc. 2022;105:1685 –1696	If the MCNM composition is not noted in the MCNM or information tab, composition is based on the stoichiometry
ZnSiO2	SiO2 w ZnO NPs on surface (Zn content~30%, XPS)	66.3	270-350 w 5-15 nm ZnONPs	24 h	Cell viability colorimetric assay	EC50	185.64	0.0028	E. Coli	Bacteria	-2.55284	Krakor et al., J Am Ceram Soc. 2022;105:1685 –1696	If the MCNM composition is not noted in the MCNM or information tab, composition is based on the stoichiometry
ZnSiO2	SiO2 w ZnO NPs on surface (Zn content~30%, XPS)	66.3	270-350 w 5-15 nm ZnONPs	6 h	Cell viability colorimetric assay	EC50	134.589	0.00203	E. Coli	Bacteria	-2.6925	Krakor et al., J Am Ceram Soc. 2022;105:1685 –1696	If the MCNM composition is not noted in the MCNM or information tab, composition is based on the stoichiometry
(La0.5Sr0.5)0.99MnO3	Doped rare earth oxides	215.167	137	30 min	Flash assay	EC50	>500	>0.0023237764155284	Vibrio fischeri	Bacteria	-	Kurvet et al., Materials 2017, 10, 754	If the MCNM composition is not noted in the MCNM or information tab, composition is based on the stoichiometry
(La0.6Sr0.4)0.95CoO3	Doped rare earth oxides	219.518	65	30 min	Flash assay	EC50	>500	>0.0022777175448027	Vibrio fischeri	Bacteria	-	Kurvet et al., Materials 2017, 10, 754	If the MCNM composition is not noted in the MCNM or information tab, composition is based on the stoichiometry
Ce0.8Pr0.2O2	Doped rare earth oxides	172.2	23	30 min	Flash assay	EC50	>500	>0.00290360046457607	Vibrio fischeri	Bacteria	-	Kurvet et al., Materials 2017, 10, 754	If the MCNM composition is not noted in the MCNM or information tab, composition is based on the stoichiometry
Ce0.9Gd0.1O2	Doped rare earth oxides	173.7	27	30 min	Flash assay	EC50	>500	>0.00287852619458837	Vibrio fischeri	Bacteria	-	Kurvet et al., Materials 2017, 10, 754	If the MCNM composition is not noted in the MCNM or information tab, composition is based on the stoichiometry
Gd0.97CoO3	Doped rare earth oxides	259.29	230	30 min	Flash assay	EC50	>500	>0.00192834278221297	Vibrio fischeri	Bacteria	-	Kurvet et al., Materials 2017, 10, 754	If the MCNM composition is not noted in the MCNM or information tab, composition is based on the stoichiometry
LaCoO3	Doped rare earth oxides	246	590	30 min	Flash assay	EC50	>500	>0.00203252032520325	Vibrio fischeri	Bacteria	-	Kurvet et al., Materials 2017, 10, 754	If the MCNM composition is not noted in the MCNM or information tab, composition is based on the stoichiometry
LaFeO3	Doped rare earth oxides	243	126	30 min	Flash assay	EC50	>500	>0.00205761316872428	Vibrio fischeri	Bacteria	-	Kurvet et al., Materials 2017, 10, 754	If the MCNM composition is not noted in the MCNM or information tab, composition is based on the stoichiometry
MgO-SrO-ZnO	Composite oxide (equal ratio)	75	94.29	24 h	growth inhibition assay	IC50	50	0.000666667	C. albicans	Eukaryotes	-3.17609	Lakshmi et al., (2023) Journal of New Materials for Electrochemical Systems, Vol. 26, No. 2, pp. 124-127	If the MCNM composition is not noted in the MCNM or information tab, composition is based on the stoichiometry
Au-Ag	Bimetallic NP (20% Au)	125.8	72	48 h	Acute toxicity test	LC50	0.019	1.51033e-07	Daphnia magna	Crustacean	-6.82093	Li et al., Anal Bioanal Chem (2010) 398:689–700	If the MCNM composition is not noted in the MCNM or information tab, composition is based on the stoichiometry
Au-Ag	Bimetallic NP (80% Au)	179.2	41	48 h	Acute toxicity test	LC50	0.059	3.29241e-07	Daphnia magna	Crustacean	-6.48249	Li et al., Anal Bioanal Chem (2010) 398:689–700	If the MCNM composition is not noted in the MCNM or information tab, composition is based on the stoichiometry
ZnO-Fe10	ZnO doped with Fe. Percentage in name	78.5	8.3	24 h	bactericidal assay	IC50	0.396787	5.05461e-06	B.subtilis	Bacteria	-5.29631	Li et al., Environ. Sci. Technol. 2011, 45, 755–761	If the MCNM composition is not noted in the MCNM or information tab, composition is based on the stoichiometry
ZnO-Fe2	ZnO doped with Fe. Percentage in name	80.5	13.9	24 h	bactericidal assay	IC50	0.261981	3.25442e-06	B.subtilis	Bacteria	-5.48753	Li et al., Environ. Sci. Technol. 2011, 45, 755–761	If the MCNM composition is not noted in the MCNM or information tab, composition is based on the stoichiometry
ZnO-Fe6	ZnO doped with Fe. Percentage in name	79.5	8.1	24 h	bactericidal assay	IC50	0.526204	6.61891e-06	B.subtilis	Bacteria	-5.17921	Li et al., Environ. Sci. Technol. 2011, 45, 755–761	If the MCNM composition is not noted in the MCNM or information tab, composition is based on the stoichiometry
ZnO-Fe8	ZnO doped with Fe. Percentage in name	79	8.2	24 h	bactericidal assay	IC50	0.371289	4.69985e-06	B.subtilis	Bacteria	-5.32792	Li et al., Environ. Sci. Technol. 2011, 45, 755–761	If the MCNM composition is not noted in the MCNM or information tab, composition is based on the stoichiometry
ZnO-Fe10	ZnO doped with Fe. Percentage in name	78.5	8.3	24 h	bactericidal assay	IC50	18.3833	0.000234182	E. Coli	Bacteria	-3.63045	Li et al., Environ. Sci. Technol. 2011, 45, 755–761	If the MCNM composition is not noted in the MCNM or information tab, composition is based on the stoichiometry
ZnO-Fe2	ZnO doped with Fe. Percentage in name	80.5	13.9	24 h	bactericidal assay	IC50	20.6492	0.000256512	E. Coli	Bacteria	-3.59089	Li et al., Environ. Sci. Technol. 2011, 45, 755–761	If the MCNM composition is not noted in the MCNM or information tab, composition is based on the stoichiometry
ZnO-Fe6	ZnO doped with Fe. Percentage in name	79.5	8.1	24 h	bactericidal assay	IC50	28.7829	0.000362049	E. Coli	Bacteria	-3.44123	Li et al., Environ. Sci. Technol. 2011, 45, 755–761	If the MCNM composition is not noted in the MCNM or information tab, composition is based on the stoichiometry
ZnO-Fe8	ZnO doped with Fe. Percentage in name	79	8.2	24 h	bactericidal assay	IC50	22.0673	0.000279333	E. Coli	Bacteria	-3.55388	Li et al., Environ. Sci. Technol. 2011, 45, 755–761	If the MCNM composition is not noted in the MCNM or information tab, composition is based on the stoichiometry
Fe:ZnO	Fe doped ZnO (5%)	78.8	20	48 h	MT assay	EC50	50	0.000634518	Daphnia magna	Crustacean	-3.19756	Liu et al., International Journal of Photoenergy Volume 2014, Article ID 475825,	If the MCNM composition is not noted in the MCNM or information tab, composition is based on the stoichiometry
Co:ZnO	Co doped ZnO (5%)	78.95	40-100	48 h	MT assay	EC50	50	0.000633312	Daphnia magna	Crustacean	-3.19838	Liu et al., International Journal of Photoenergy Volume 2014, Article ID 475825,	If the MCNM composition is not noted in the MCNM or information tab, composition is based on the stoichiometry
Ni:ZnO	Ni doped ZnO (5%)	78.95	40-100	48 h	MT assay	EC50	50	0.000633312	Daphnia magna	Crustacean	-3.19838	Liu et al., International Journal of Photoenergy Volume 2014, Article ID 475825,	If the MCNM composition is not noted in the MCNM or information tab, composition is based on the stoichiometry
Mn:ZnO	Mn doped ZnO (5%)	78.75	--	48 h	MT assay	EC50	50	0.000634921	Daphnia magna	Crustacean	-3.19728	Liu et al., International Journal of Photoenergy Volume 2014, Article ID 475825,	If the MCNM composition is not noted in the MCNM or information tab, composition is based on the stoichiometry
Fe:ZnO	Fe doped ZnO (5%)	78.8	20	48 h	MDA assay	EC50	50	0.000634518	Daphnia magna	Crustacean	-3.19756	Liu et al., International Journal of Photoenergy Volume 2014, Article ID 475825,	If the MCNM composition is not noted in the MCNM or information tab, composition is based on the stoichiometry
Co:ZnO	Co doped ZnO (5%)	78.95	40-100	48 h	MDA assay	EC50	50	0.000633312	Daphnia magna	Crustacean	-3.19838	Liu et al., International Journal of Photoenergy Volume 2014, Article ID 475825,	If the MCNM composition is not noted in the MCNM or information tab, composition is based on the stoichiometry
Ni:ZnO	Ni doped ZnO (5%)	78.95	40-100	48 h	MDA assay	EC50	50	0.000633312	Daphnia magna	Crustacean	-3.19838	Liu et al., International Journal of Photoenergy Volume 2014, Article ID 475825,	If the MCNM composition is not noted in the MCNM or information tab, composition is based on the stoichiometry
Mn:ZnO	Mn doped ZnO (5%)	78.75	--	48 h	MDA assay	EC50	50	0.000634921	Daphnia magna	Crustacean	-3.19728	Liu et al., International Journal of Photoenergy Volume 2014, Article ID 475825,	If the MCNM composition is not noted in the MCNM or information tab, composition is based on the stoichiometry
Ag2O-TiO2	Co synthesized NP: 19% Ag2O	108.88	30	96 h	Acute toxicity test	Lc50	1.22	1.1205e-05	Danio rerio	Fish	-4.95059	Mahjoubian et al. / Chemosphere 263 (2021) 128182	If the MCNM composition is not noted in the MCNM or information tab, composition is based on the stoichiometry
Ni:SiO2	SiO2 np w Ni Np on surface (9%)	59.91	43.3	5 days	Mortality test	LC50	>400	>0.00667668168920047	Danio rerio	Fish	-	Mahoney et al., 2016,PLoS ONE 11(3): e0152010	If the MCNM composition is not noted in the MCNM or information tab, composition is based on the stoichiometry
Ni:SiO2	SiO2 np w Ni Np on surface (9.6%)	59.904	41.2	5 days	Mortality test	LC50	>400	>0.00667735042735043	Danio rerio	Fish	-	Mahoney et al., 2016,PLoS ONE 11(3): e0152010	If the MCNM composition is not noted in the MCNM or information tab, composition is based on the stoichiometry
Ni:SiO2	SiO2 np w Ni Np on surface (11.9%)	59.881	54.5	5 days	Mortality test	LC50	>400	>0.0066799151650774	Danio rerio	Fish	-	Mahoney et al., 2016,PLoS ONE 11(3): e0152010	If the MCNM composition is not noted in the MCNM or information tab, composition is based on the stoichiometry
ZnO:AgO	ZnO doped AgO (11.9%)	118.883	40–60	48 h	growth inhibition assay	IC50	250	0.00210291	C. Martini	Eukaryotes	-2.67718	Malathi et al., Ann. For. Res. 65(1): 5263-5271, 2022	If the MCNM composition is not noted in the MCNM or information tab, composition is based on the stoichiometry
CuO:AgO	CuO doped AgO (4.8%)	121.864	30	48 h	growth inhibition assay	IC50	125	0.00102573	C. Martini	Eukaryotes	-2.98897	Malathi et al., Ann. For. Res. 65(1): 5263-5271, 2022	If the MCNM composition is not noted in the MCNM or information tab, composition is based on the stoichiometry
NiO:AgO	NiO doped AgO (5.5%)	121.305	30	48 h	growth inhibition assay	IC50	250	0.00206092	C. Martini	Eukaryotes	-2.68594	Malathi et al., Ann. For. Res. 65(1): 5263-5271, 2022	If the MCNM composition is not noted in the MCNM or information tab, composition is based on the stoichiometry
ZnO:AgO	ZnO doped AgO (11.9%)	118.883	40–60	48 h	growth inhibition assay	IC50	250	0.00210291	C. flexuosus	Eukaryotes	-2.67718	Malathi et al., Ann. For. Res. 65(1): 5263-5271, 2022	If the MCNM composition is not noted in the MCNM or information tab, composition is based on the stoichiometry
CuO:AgO	CuO doped AgO (4.8%)	121.864	30	48 h	growth inhibition assay	IC50	250	0.00205147	C. flexuosus	Eukaryotes	-2.68794	Malathi et al., Ann. For. Res. 65(1): 5263-5271, 2022	If the MCNM composition is not noted in the MCNM or information tab, composition is based on the stoichiometry
NiO:AgO	NiO doped AgO (5.5%)	121.305	30	48 h	growth inhibition assay	IC50	250	0.00206092	C. flexuosus	Eukaryotes	-2.68594	Malathi et al., Ann. For. Res. 65(1): 5263-5271, 2022	If the MCNM composition is not noted in the MCNM or information tab, composition is based on the stoichiometry
ZnO:AgO	ZnO doped AgO (11.9%)	118.883	40–60	48 h	growth inhibition assay	IC50	250	0.00210291	C.winterianu	Eukaryotes	-2.67718	Malathi et al., Ann. For. Res. 65(1): 5263-5271, 2022	If the MCNM composition is not noted in the MCNM or information tab, composition is based on the stoichiometry
CuO:AgO	CuO doped AgO (4.8%)	121.864	30	48 h	growth inhibition assay	IC50	250	0.00205147	C.winterianu	Eukaryotes	-2.68794	Malathi et al., Ann. For. Res. 65(1): 5263-5271, 2022	If the MCNM composition is not noted in the MCNM or information tab, composition is based on the stoichiometry
NiO:AgO	NiO doped AgO (5.5%)	121.305	30	48 h	growth inhibition assay	IC50	250	0.00206092	C.winterianu	Eukaryotes	-2.68594	Malathi et al., Ann. For. Res. 65(1): 5263-5271, 2022	If the MCNM composition is not noted in the MCNM or information tab, composition is based on the stoichiometry
Ce:TiO2	Ce doped TiO2 (0.4%)	80.368	<10	7 days	growth inhibition assay	EC50	>25000	>0.31106908222178	L. minor	Plants	-	Matejova et al, Surfaces and Interfaces 38 (2023) 102762	If the MCNM composition is not noted in the MCNM or information tab, composition is based on the stoichiometry
Ce:TiO2	Ce doped TiO2 (5.45%)	85.014	<10	7 days	growth inhibition assay	EC50	>25000	>0.294069212129767	L. minor	Plants	-	Matejova et al, Surfaces and Interfaces 38 (2023) 102762	If the MCNM composition is not noted in the MCNM or information tab, composition is based on the stoichiometry
Ce0.05Ti0.95O2	Ce doped TiO2 (5%)	84.6	<10	7 days	growth inhibition assay	EC50	>25000	>0.295508274231679	L. minor	Plants	-	Matejova et al, Surfaces and Interfaces 38 (2023) 102762	If the MCNM composition is not noted in the MCNM or information tab, composition is based on the stoichiometry
Zr0.1Ti0.9O2	Zr doped TiO2 (10%)	84.3	<10	7 days	growth inhibition assay	EC50	>25000	>0.29655990510083	L. minor	Plants	-	Matejova et al, Surfaces and Interfaces 38 (2023) 102762	If the MCNM composition is not noted in the MCNM or information tab, composition is based on the stoichiometry
Zr0.1Ti0.9O	Zr doped TiO2 (10%)	84.3	<10	7 days	growth inhibition assay	EC50	>25000	>0.29655990510083	L. minor	Plants	-	Matejova et al, Surfaces and Interfaces 38 (2023) 102762	If the MCNM composition is not noted in the MCNM or information tab, composition is based on the stoichiometry
Ce:TiO2	Ce doped TiO2 (0.4%)	80.368	<10	7 days	Root growth inhibition assay	EC50	>1000	>0.0124427632888712	Sinapis alba	Plants	-	Matejova et al, Surfaces and Interfaces 38 (2023) 102762	If the MCNM composition is not noted in the MCNM or information tab, composition is based on the stoichiometry
Ce:TiO2	Ce doped TiO2 (5.45%)	85.014	<10	7 days	Root growth inhibition assay	EC50	>1000	>0.0117627684851907	Sinapis alba	Plants	-	Matejova et al, Surfaces and Interfaces 38 (2023) 102762	If the MCNM composition is not noted in the MCNM or information tab, composition is based on the stoichiometry
Ce0.05Ti0.95O2	Ce doped TiO2 (5%)	84.6	<10	7 days	Root growth inhibition assay	EC50	>1000	>0.0118203309692671	Sinapis alba	Plants	-	Matejova et al, Surfaces and Interfaces 38 (2023) 102762	If the MCNM composition is not noted in the MCNM or information tab, composition is based on the stoichiometry
Zr0.1Ti0.9O2	Zr doped TiO2 (10%)	84.3	<10	7 days	Root growth inhibition assay	EC50	>1000	>0.0118623962040332	Sinapis alba	Plants	-	Matejova et al, Surfaces and Interfaces 38 (2023) 102762	If the MCNM composition is not noted in the MCNM or information tab, composition is based on the stoichiometry
Zr0.1Ti0.9O	Zr doped TiO2 (10%)	84.3	<10	7 days	Root growth inhibition assay	EC50	>1000	>0.0118623962040332	Sinapis alba	Plants	-	Matejova et al, Surfaces and Interfaces 38 (2023) 102762	If the MCNM composition is not noted in the MCNM or information tab, composition is based on the stoichiometry
Zn-Co3O4	Zn-doped Co3O4 (4%)	234.56	68.14	72 h	growth inhibition assay	IC50	>200	>0.000852660300136426	Aspergillus niger	Eukaryotes	-	Mayakannan et al., Inorganic and Nano-Metal Chemistry, DOI: 10.1080/24701556.2021.1992431	If the MCNM composition is not noted in the MCNM or information tab, composition is based on the stoichiometry
Cu:ZnO	CuO doped ZnO(2%)	80.97	30–40	24 h	photocatalytic inactivation	LC50	250	0.00308756	S.aureus	Bacteria	-2.51038	Medina-Ramírez, et al. Ceramics International 45 (2019) 17476–17	If the MCNM composition is not noted in the MCNM or information tab, composition is based on the stoichiometry
Cu:ZnO	CuO doped ZnO(2%)	80.97	30–40	24 h	photocatalytic inactivation	LC50	250	0.00308756	E. coli	Bacteria	-2.51038	Medina-Ramírez, et al. Ceramics International 45 (2019) 17476–17	If the MCNM composition is not noted in the MCNM or information tab, composition is based on the stoichiometry
Cu-ZnO	ZnO doped with Cu on its surface (2%)	80.98	30-40	48 h	Acute toxicity test	LC50	9.666	0.000119363	Daphnia magna	Crustacean	-3.92313	Medina-Ramírez, et al. Ceramics International 45 (2019) 17476–17488	If the MCNM composition is not noted in the MCNM or information tab, composition is based on the stoichiometry
Cu-ZnO	ZnO doped with Cu on its surface (2%)	80.98	30-40	48 h	Acute toxicity test	LC50	5.599	6.91405e-05	Lecane papuana	Other	-4.16027	Medina-Ramírez, et al. Ceramics International 45 (2019) 17476–17488	If the MCNM composition is not noted in the MCNM or information tab, composition is based on the stoichiometry
Fe-CuO	Fe-doped CuO (1%)	80.305	12	72 h	Embryo Hatching	EC50	0.5	6.22626e-06	Danio rerio (embryo)	Fish	-5.20577	Naatz et al., ACSNano, 2017, 11, 501−515509	If the MCNM composition is not noted in the MCNM or information tab, composition is based on the stoichiometry
Fe-CuO	Fe-doped CuO (6%)	84.33	10.3	72 h	Embryo Hatching	EC50	0.5	5.92909e-06	Danio rerio (embryo)	Fish	-5.22701	Naatz et al., ACSNano, 2017, 11, 501−515509	If the MCNM composition is not noted in the MCNM or information tab, composition is based on the stoichiometry
Fe-CuO	Fe-doped CuO (10%)	587.55	10.7	72 h	Embryo Hatching	EC50	0.5	8.50991e-07	Danio rerio (embryo)	Fish	-6.07007	Naatz et al., ACSNano, 2017, 11, 501−515509	If the MCNM composition is not noted in the MCNM or information tab, composition is based on the stoichiometry
ZnO-TiO2	nanocomposite: 50% ZnO, 50%TiO2	80.5	--	7 days	growth inhibition assay	IC50	78	0.000968944	A. flavus	Eukaryotes	-3.0137	Najibi Ilkhechi et al., Journal of the Australian Ceramic Society (2021) 57:793–802	If the MCNM composition is not noted in the MCNM or information tab, composition is based on the stoichiometry
ZnO-TiO2-Au5%	nanocomposite: 47.5% ZnO, 47.5%TiO2, 5% Au	86.325	--	7 days	growth inhibition assay	IC50	2.5	2.89603e-05	A. flavus	Eukaryotes	-4.5382	Najibi Ilkhechi et al., Journal of the Australian Ceramic Society (2021) 57:793–802	If the MCNM composition is not noted in the MCNM or information tab, composition is based on the stoichiometry
ZnO-TiO2-Au10%	nanocomposite: 45% ZnO, 45%TiO2, 10% Au	92.15	--	7 days	growth inhibition assay	IC50	1.25	1.35648e-05	A. flavus	Eukaryotes	-4.86759	Najibi Ilkhechi et al., Journal of the Australian Ceramic Society (2021) 57:793–802	If the MCNM composition is not noted in the MCNM or information tab, composition is based on the stoichiometry
ZnO-TiO2-Au15%	nanocomposite: 42.5% ZnO, 42.5%TiO2, 15% Au	97.975	--	7 days	growth inhibition assay	IC50	0.625	6.37918e-06	A. flavus	Eukaryotes	-5.19524	Najibi Ilkhechi et al., Journal of the Australian Ceramic Society (2021) 57:793–802	If the MCNM composition is not noted in the MCNM or information tab, composition is based on the stoichiometry
ZnO-TiO2	nanocomposite: 50% ZnO, 50%TiO2	80.5	35	7 days	growth inhibition assay	IC50	78	0.000968944	A. flavus	Eukaryotes	-3.0137	Najibi Ilkhechi et al., Pesticide Biochemistry and Physiology 176 (2021) 104869	If the MCNM composition is not noted in the MCNM or information tab, composition is based on the stoichiometry
CeO2:TiO2	CeO2-doped TiO2 (15%wt CeO2)	86.9	-	48 h	Acute toxicity (mortality)	EC50	825	0.00949367	Daphnia magna	Crustacean	-2.02257	Öztekin et al., (2022) J Biomed Res Environ Sci, DOI: https://dx.doi.org/10.37871/jbres1524	If the MCNM composition is not noted in the MCNM or information tab, composition is based on the stoichiometry
CeO2:TiO2	CeO2-doped TiO2 (5%wt CeO2)	82.3	-	48 h	Acute toxicity (mortality)	EC50	825	0.0100243	Daphnia magna	Crustacean	-1.99895	Öztekin et al., (2022) J Biomed Res Environ Sci, DOI: https://dx.doi.org/10.37871/jbres1524	If the MCNM composition is not noted in the MCNM or information tab, composition is based on the stoichiometry
CeO2:TiO2	CeO2-doped TiO2 (15%wt CeO2)	86.9	-	48 h	Acute toxicity (mortality)	EC50	825	0.00949367	Daphnia magna	Crustacean	-2.02257	Öztekin et al., (2022) J Biomed Res Environ Sci, DOI: https://dx.doi.org/10.37871/jbres1524	If the MCNM composition is not noted in the MCNM or information tab, composition is based on the stoichiometry
CeO2:TiO2	CeO2-doped TiO2 (5%wt CeO2)	82.3	-	48 h	Acute toxicity (mortality)	EC50	825	0.0100243	Daphnia magna	Crustacean	-1.99895	Öztekin et al., (2022) J Biomed Res Environ Sci, DOI: https://dx.doi.org/10.37871/jbres1524	If the MCNM composition is not noted in the MCNM or information tab, composition is based on the stoichiometry
Cu:Co3O4	Cu doped Co3O4 (10%)	223.25	12.4	72 h	Hatching rate	EC50	100	0.000447928	Danio rerio embryos	Fish	-3.34879	Peng et al., ACS Nano 2020, 14, 4, 4166–4177	If the MCNM composition is not noted in the MCNM or information tab, composition is based on the stoichiometry
Cu:Co3O4	Cu doped Co3O4 (10%)	223.25	12.4	96 h	Hatching rate	EC50	100	0.000447928	Danio rerio embryos	Fish	-3.34879	Peng et al., ACS Nano 2020, 14, 4, 4166–4177	If the MCNM composition is not noted in the MCNM or information tab, composition is based on the stoichiometry
Cu:Co3O4	Cu doped Co3O4 (10%)	223.25	12.4	120 h	Hatching rate	EC50	100	0.000447928	Danio rerio embryos	Fish	-3.34879	Peng et al., ACS Nano 2020, 14, 4, 4166–4177	If the MCNM composition is not noted in the MCNM or information tab, composition is based on the stoichiometry
Ni-TiO2	TiO2 NPS w metal on surface: 1% Ni	79.79	50	96 h	Acute toxicity test	Lc50	95.6	0.00119815	carp	Fish	-2.92149	Pirsaheb et al. / Chemosphere 215 (2019) 904-915	If the MCNM composition is not noted in the MCNM or information tab, composition is based on the stoichiometry
Fe-TiO2	TiO2 NPS w metal on surface: 1% Fe	79.76	55	96 h	Acute toxicity test	Lc50	94.2	0.00118104	carp	Fish	-2.92773	Pirsaheb et al. / Chemosphere 215 (2019) 904-915	If the MCNM composition is not noted in the MCNM or information tab, composition is based on the stoichiometry
Cr-TiO2	TiO2 NPS w metal on surface: 1% Cr	79.72	60	96 h	Acute toxicity test	Lc50	91.7	0.00115028	carp	Fish	-2.9392	Pirsaheb et al. / Chemosphere 215 (2019) 904-915	If the MCNM composition is not noted in the MCNM or information tab, composition is based on the stoichiometry
Ni-TiO2	TiO2 NPS w metal on surface: 1% Ni	79.79	50	96 h	Acute toxicity test	Lc50	95.6	0.00119815	goldfish	Fish	-2.92149	Pirsaheb et al. / Chemosphere 215 (2019) 904-915	If the MCNM composition is not noted in the MCNM or information tab, composition is based on the stoichiometry
Fe-TiO2	TiO2 NPS w metal on surface: 1% Fe	79.76	55	96 h	Acute toxicity test	Lc50	94.2	0.00118104	goldfish	Fish	-2.92773	Pirsaheb et al. / Chemosphere 215 (2019) 904-915	If the MCNM composition is not noted in the MCNM or information tab, composition is based on the stoichiometry
Cr-TiO2	TiO2 NPS w metal on surface: 1% Cr	79.72	60	96 h	Acute toxicity test	Lc50	91.7	0.00115028	goldfish	Fish	-2.9392	Pirsaheb et al. / Chemosphere 215 (2019) 904-915	If the MCNM composition is not noted in the MCNM or information tab, composition is based on the stoichiometry
Co-Fe3O4	Co doped Fe3O4 (3%)	232.27	<100	24 h	growth inhibition assay	IC50	>2048	>0.00881732466526026	Shigella dysenteriae	Bacteria	-	Rahdar et al., Canadian Journal of Chemistry (2020),98(1) (10.1139/cjc-2019-0268)	If the MCNM composition is not noted in the MCNM or information tab, composition is based on the stoichiometry
Co-Fe3O4	Co doped Fe3O4 (3%)	232.27	<100	24 h	growth inhibition assay	IC50	>2048	>0.00881732466526026	K. pneumoniae	Bacteria	-	Rahdar et al., Canadian Journal of Chemistry (2020),98(1) (10.1139/cjc-2019-0268)	If the MCNM composition is not noted in the MCNM or information tab, composition is based on the stoichiometry
Co-Fe3O4	Co doped Fe3O4 (3%)	232.27	<100	24 h	growth inhibition assay	IC50	>2048	>0.00881732466526026	A. baumannii	Bacteria	-	Rahdar et al., Canadian Journal of Chemistry (2020),98(1) (10.1139/cjc-2019-0268)	If the MCNM composition is not noted in the MCNM or information tab, composition is based on the stoichiometry
Co-Fe3O4	Co doped Fe3O4 (3%)	232.27	<100	24 h	growth inhibition assay	IC50	>2048	>0.00881732466526026	S. pyogene	Bacteria	-	Rahdar et al., Canadian Journal of Chemistry (2020),98(1) (10.1139/cjc-2019-0268)	If the MCNM composition is not noted in the MCNM or information tab, composition is based on the stoichiometry
Co-Fe3O4	Co doped Fe3O4 (3%)	232.27	<100	24 h	growth inhibition assay	IC50	1024	0.00440866	C. albicans	Eukaryotes	-2.35569	Rahdar et al., Canadian Journal of Chemistry (2020),98(1) (10.1139/cjc-2019-0268)	If the MCNM composition is not noted in the MCNM or information tab, composition is based on the stoichiometry
Co-Fe3O4	Co doped Fe3O4 (3%)	232.27	<100	24 h	growth inhibition assay	IC50	2048	0.00881732	Fusarium oxysporum	Eukaryotes	-2.05466	Rahdar et al., Canadian Journal of Chemistry (2020),98(1) (10.1139/cjc-2019-0268)	If the MCNM composition is not noted in the MCNM or information tab, composition is based on the stoichiometry
Co-Fe3O4	Co doped Fe3O4 (3%)	232.27	<100	24 h	growth inhibition assay	IC50	256	0.00110217	Aspergillus fumigatus	Eukaryotes	-2.95775	Rahdar et al., Canadian Journal of Chemistry (2020),98(1) (10.1139/cjc-2019-0268)	If the MCNM composition is not noted in the MCNM or information tab, composition is based on the stoichiometry
Ag:ZnO	Ag doped ZnO(5%)	82.35	27.5	24 h	Plate count	EC50	0.1	1.21433e-06	B. subtilis	Bacteria	-5.91566	Ranjithkumar et al., Physica E: Low-dimensional Systems and Nanostructures 133 (2021) 114801	If the MCNM composition is not noted in the MCNM or information tab, composition is based on the stoichiometry
Ag:ZnO	Ag doped ZnO(5%)	82.35	25.5	24 h	Plate count	EC50	0.1	1.21433e-06	E. Coli	Bacteria	-5.91566	Ranjithkumar et al., Physica E: Low-dimensional Systems and Nanostructures 133 (2021) 114801	If the MCNM composition is not noted in the MCNM or information tab, composition is based on the stoichiometry
Fe:TiO2	Fe doped TiO2 (4.7%)	78.872	22	72 h	Mortality test	LC50	>100	>0.00126787706663962	Siluriformes	Fish	-	RaO ET AL, Current Nanomaterials, 2019, Vol. 4, No. 3	If the MCNM composition is not noted in the MCNM or information tab, composition is based on the stoichiometry
Fe:TiO2	Fe doped TiO2 (4.7%)	78.872	22	96 h	Mortality test	LC50	>100	>0.00126787706663962	Siluriformes	Fish	-	RaO ET AL, Current Nanomaterials, 2019, Vol. 4, No. 3	If the MCNM composition is not noted in the MCNM or information tab, composition is based on the stoichiometry
NiFe2O4	NiO doped Fe2O4 (33% NiO)	131.95	15	72 h	Mortality test	LC50	54.7	0.000414551	Siluriformes	Fish	-3.38242	RaO ET AL, Current Nanomaterials, 2019, Vol. 4, No. 3	If the MCNM composition is not noted in the MCNM or information tab, composition is based on the stoichiometry
NiFe2O4	NiO doped Fe2O4 (33% NiO)	131.95	15	96 h	Mortality test	LC50	48.6	0.000368321	Siluriformes	Fish	-3.43377	RaO ET AL, Current Nanomaterials, 2019, Vol. 4, No. 3	If the MCNM composition is not noted in the MCNM or information tab, composition is based on the stoichiometry
Cao-ZnO	Cao doped ZnO (0.1%)	80.975	226.9	48 h	growth inhibition assay	IC50	77.51	0.000957209	C. albicans(CDC-B11903	Eukaryotes	-3.01899	Reda et al., J Aust Ceram Soc (2023). https://doi.org/10.1007/s41779-023-00912-9	If the MCNM composition is not noted in the MCNM or information tab, composition is based on the stoichiometry
Cao-ZnO	Cao doped ZnO (0.9%)	80.775	137.3	48 h	growth inhibition assay	IC50	44.76	0.000554132	C. albicans(CDC-B11903	Eukaryotes	-3.25639	Reda et al., J Aust Ceram Soc (2023). https://doi.org/10.1007/s41779-023-00912-9	If the MCNM composition is not noted in the MCNM or information tab, composition is based on the stoichiometry
Cao-ZnO	Cao doped ZnO (0.1%)	80.975	226.9	48 h	growth inhibition assay	IC50	167.6	0.00206977	C. albicans(CDC-CAU9)	Eukaryotes	-2.68408	Reda et al., J Aust Ceram Soc (2023). https://doi.org/10.1007/s41779-023-00912-9	If the MCNM composition is not noted in the MCNM or information tab, composition is based on the stoichiometry
Cao-ZnO	Cao doped ZnO (0.9%)	80.775	137.3	48 h	growth inhibition assay	IC50	101.9	0.00126153	C. albicans(CDC-CAU9)	Eukaryotes	-2.8991	Reda et al., J Aust Ceram Soc (2023). https://doi.org/10.1007/s41779-023-00912-9	If the MCNM composition is not noted in the MCNM or information tab, composition is based on the stoichiometry
Zn0.5Fe2.5O4	ZnO doped Fe2O3	146.833	12	24 h	Mortality test	LC50	>2000	>0.0136208853575482	Xenopus laevis (embryos)	Other	-	Rivero et al. J Nanopart Res (2019) 21: 181	If the MCNM composition is not noted in the MCNM or information tab, composition is based on the stoichiometry
Zn0.5Fe2.5O4	ZnO doped Fe2O3	146.833	12	48 h	Mortality test	LC50	>2000	>0.0136208853575482	Xenopus laevis (embryos)	Other	-	Rivero et al. J Nanopart Res (2019) 21: 181	If the MCNM composition is not noted in the MCNM or information tab, composition is based on the stoichiometry
Zn0.5Fe2.5O4	ZnO doped Fe2O3	146.833	12	72 h	Mortality test	LC50	>1500	0.0102157	Xenopus laevis (embryos)	Other	-	Rivero et al. J Nanopart Res (2019) 21: 181	If the MCNM composition is not noted in the MCNM or information tab, composition is based on the stoichiometry
CuO:SiO2	Composite (57%SiO20	68.385	30–70	96 h	Mortality test	LC50	>200	>0.00292461797177744	Danio rerio embryos	Fish	-	Sabeena et al., Journal of King Saud University – Science 34 (2022) 102121	If the MCNM composition is not noted in the MCNM or information tab, composition is based on the stoichiometry
Fe:CuO:SiO2	Fe doped composite (16.67%)	66.3204	30–70	96 h	Mortality test	LC50	>200	>0.00301566242331048	Danio rerio embryos	Fish	-	Sabeena et al., Journal of King Saud University – Science 34 (2022) 102121	If the MCNM composition is not noted in the MCNM or information tab, composition is based on the stoichiometry
CuO:SiO2	Composite (57%SiO20	68.385	30–70	96 h	Hatching rate	LC50	>200	>0.00292461797177744	Danio rerio embryos	Fish	-	Sabeena et al., Journal of King Saud University – Science 34 (2022) 102121	If the MCNM composition is not noted in the MCNM or information tab, composition is based on the stoichiometry
Fe:CuO:SiO2	Fe doped composite (16.67%)	66.3204	30–70	96 h	Hatching rate	LC50	>200	>0.00301566242331048	Danio rerio embryos	Fish	-	Sabeena et al., Journal of King Saud University – Science 34 (2022) 102121	If the MCNM composition is not noted in the MCNM or information tab, composition is based on the stoichiometry
CuO:SiO2	Composite (57%SiO20	68.385	30–70	96 h	Malformation	LC50	>200	>0.00292461797177744	Danio rerio embryos	Fish	-	Sabeena et al., Journal of King Saud University – Science 34 (2022) 102121	If the MCNM composition is not noted in the MCNM or information tab, composition is based on the stoichiometry
Fe:CuO:SiO2	Fe doped composite (16.67%)	66.3204	30–70	96 h	Malformation	LC50	>200	>0.00301566242331048	Danio rerio embryos	Fish	-	Sabeena et al., Journal of King Saud University – Science 34 (2022) 102121	If the MCNM composition is not noted in the MCNM or information tab, composition is based on the stoichiometry
CuO:SiO2	Composite (57%SiO20	68.385	30–70	72 h	Mortality test	LC50	>200	>0.00292461797177744	Danio rerio embryos	Fish	-	Sabeena et al., Journal of King Saud University – Science 34 (2022) 102121	If the MCNM composition is not noted in the MCNM or information tab, composition is based on the stoichiometry
Fe:CuO:SiO2	Fe doped composite (16.67%)	66.3204	30–70	72 h	Mortality test	LC50	>200	>0.00301566242331048	Danio rerio embryos	Fish	-	Sabeena et al., Journal of King Saud University – Science 34 (2022) 102121	If the MCNM composition is not noted in the MCNM or information tab, composition is based on the stoichiometry
CuO:SiO2	Composite (57%SiO20	68.385	30–70	72 h	Hatching rate	LC50	>200	>0.00292461797177744	Danio rerio embryos	Fish	-	Sabeena et al., Journal of King Saud University – Science 34 (2022) 102121	If the MCNM composition is not noted in the MCNM or information tab, composition is based on the stoichiometry
Fe:CuO:SiO2	Fe doped composite (16.67%)	66.3204	30–70	72 h	Hatching rate	LC50	>200	>0.00301566242331048	Danio rerio embryos	Fish	-	Sabeena et al., Journal of King Saud University – Science 34 (2022) 102121	If the MCNM composition is not noted in the MCNM or information tab, composition is based on the stoichiometry
CuO:SiO2	Composite (57%SiO20	68.385	30–70	72 h	Malformation	LC50	>200	>0.00292461797177744	Danio rerio embryos	Fish	-	Sabeena et al., Journal of King Saud University – Science 34 (2022) 102121	If the MCNM composition is not noted in the MCNM or information tab, composition is based on the stoichiometry
Fe:CuO:SiO2	Fe doped composite (16.67%)	66.3204	30–70	72 h	Malformation	LC50	>200	>0.00301566242331048	Danio rerio embryos	Fish	-	Sabeena et al., Journal of King Saud University – Science 34 (2022) 102121	If the MCNM composition is not noted in the MCNM or information tab, composition is based on the stoichiometry
Au:CdO	Au loaded CdO (10% Au)	134.9	42	24 h	CFU density	EC50	60	0.000444774	E. Coli	Bacteria	-3.35186	Sagadevan et al., Nanostruct Chem 11, 561–572 (2021).	If the MCNM composition is not noted in the MCNM or information tab, composition is based on the stoichiometry
Au:CdO	Au loaded CdO (10% Au)	134.9	42	24 h	CFU density	EC50	60	0.000444774	S. aureus	Bacteria	-3.35186	Sagadevan et al., Nanostruct Chem 11, 561–572 (2021).	If the MCNM composition is not noted in the MCNM or information tab, composition is based on the stoichiometry
ZnO:TiO2	TiO2 doped W ZnO on its surface (10%)	80.1	100-350	48 h	Acute toxicity assay	LC50	28.7	0.000358302	Daphnia magna	Crustacean	-3.44575	Salazar et al., Environ. Sci.: Water Res. Technol., 2022,8, 1719-1730	If the MCNM composition is not noted in the MCNM or information tab, composition is based on the stoichiometry
Ni:ZnO	Ni doped ZnO (6%)	80.64	32	24 h	growth inhibition assay	IC50	200	0.00248016	C. albicans	Eukaryotes	-2.60552	Saravana Kumar, RSC Adv., 2016, 6, 108468–108476	If the MCNM composition is not noted in the MCNM or information tab, composition is based on the stoichiometry
La:ZnO (1%)	La doped on ZnO nanorods(1%)	81.58	150.4	24 h	growth inhibition assay	IC50	>1000	>0.0122579063495955	Acinetobacter baumannii	Bacteria	-	Satpathy et al., Journal of Alloys and Compounds 865 (2021) 158937	If the MCNM composition is not noted in the MCNM or information tab, composition is based on the stoichiometry
La:ZnO (3%)	La doped on ZnO nanorods(3%)	82.74	150.4	24 h	growth inhibition assay	IC50	>1000	>0.0120860526951898	Acinetobacter baumannii	Bacteria	-	Satpathy et al., Journal of Alloys and Compounds 865 (2021) 158937	If the MCNM composition is not noted in the MCNM or information tab, composition is based on the stoichiometry
La:ZnO (5%)	La doped on ZnO nanorods(5%)	83.9	150.4	24 h	growth inhibition assay	IC50	>1000	>0.0119189511323004	Acinetobacter baumannii	Bacteria	-	Satpathy et al., Journal of Alloys and Compounds 865 (2021) 158937	If the MCNM composition is not noted in the MCNM or information tab, composition is based on the stoichiometry
La:ZnO (1%)	La doped on ZnO nanorods(1%)	81.58	150.4	24 h	growth inhibition assay	IC50	>1000	>0.0122579063495955	P. aureginosa	Bacteria	-	Satpathy et al., Journal of Alloys and Compounds 865 (2021) 158937	If the MCNM composition is not noted in the MCNM or information tab, composition is based on the stoichiometry
La:ZnO (3%)	La doped on ZnO nanorods(3%)	82.74	150.4	24 h	growth inhibition assay	IC50	>1000	>0.0120860526951898	P. aureginosa	Bacteria	-	Satpathy et al., Journal of Alloys and Compounds 865 (2021) 158937	If the MCNM composition is not noted in the MCNM or information tab, composition is based on the stoichiometry
La:ZnO (5%)	La doped on ZnO nanorods(5%)	83.9	150.4	24 h	growth inhibition assay	IC50	>1000	>0.0119189511323004	P. aureginosa	Bacteria	-	Satpathy et al., Journal of Alloys and Compounds 865 (2021) 158937	If the MCNM composition is not noted in the MCNM or information tab, composition is based on the stoichiometry
La:ZnO (1%)	La doped on ZnO nanorods(1%)	81.58	150.4	24 h	growth inhibition assay	IC50	>1000	>0.0122579063495955	S. enterica	Bacteria	-	Satpathy et al., Journal of Alloys and Compounds 865 (2021) 158937	If the MCNM composition is not noted in the MCNM or information tab, composition is based on the stoichiometry
La:ZnO (3%)	La doped on ZnO nanorods(3%)	82.74	150.4	24 h	growth inhibition assay	IC50	>1000	>0.0120860526951898	S. enterica	Bacteria	-	Satpathy et al., Journal of Alloys and Compounds 865 (2021) 158937	If the MCNM composition is not noted in the MCNM or information tab, composition is based on the stoichiometry
La:ZnO (5%)	La doped on ZnO nanorods(5%)	83.9	150.4	24 h	growth inhibition assay	IC50	>1000	>0.0119189511323004	S. enterica	Bacteria	-	Satpathy et al., Journal of Alloys and Compounds 865 (2021) 158937	If the MCNM composition is not noted in the MCNM or information tab, composition is based on the stoichiometry
La:ZnO (1%)	La doped on ZnO nanorods(1%)	81.58	150.4	16 h	Movement inhibition	IC50	>100	>0.00122579063495955	C.elegans	Eukaryotes	-	Satpathy et al., Journal of Alloys and Compounds 865 (2021) 158937	If the MCNM composition is not noted in the MCNM or information tab, composition is based on the stoichiometry
La:ZnO (3%)	La doped on ZnO nanorods(3%)	82.74	150.4	16 h	Movement inhibition	IC50	>100	>0.00120860526951898	C.elegans	Eukaryotes	-	Satpathy et al., Journal of Alloys and Compounds 865 (2021) 158937	If the MCNM composition is not noted in the MCNM or information tab, composition is based on the stoichiometry
La:ZnO (5%)	La doped on ZnO nanorods(5%)	83.9	150.4	16 h	Movement inhibition	IC50	>100	>0.00119189511323004	C.elegans	Eukaryotes	-	Satpathy et al., Journal of Alloys and Compounds 865 (2021) 158937	If the MCNM composition is not noted in the MCNM or information tab, composition is based on the stoichiometry
La:ZnO (1%)	La doped on ZnO nanorods(1%)	81.58	150.4	40 h	Movement inhibition	IC50	100	0.00122579	Danio rerio	Fish	-2.91158	Satpathy et al., Journal of Alloys and Compounds 865 (2021) 158937	If the MCNM composition is not noted in the MCNM or information tab, composition is based on the stoichiometry
La:ZnO (3%)	La doped on ZnO nanorods(3%)	82.74	150.4	40 h	Movement inhibition	IC50	>100	>0.00120860526951898	Danio rerio	Fish	-	Satpathy et al., Journal of Alloys and Compounds 865 (2021) 158937	If the MCNM composition is not noted in the MCNM or information tab, composition is based on the stoichiometry
La:ZnO (5%)	La doped on ZnO nanorods(5%)	83.9	150.4	40 h	Movement inhibition	IC50	>100	>0.00119189511323004	Danio rerio	Fish	-	Satpathy et al., Journal of Alloys and Compounds 865 (2021) 158937	If the MCNM composition is not noted in the MCNM or information tab, composition is based on the stoichiometry
Gd:ZnO (1%)	Gd doped on ZnO nanorods(1%)	81.76	134	24 h	growth inhibition assay	IC50	>1000	>0.0122309197651663	Acinetobacter baumannii	Bacteria	-	Satpathy et al., Materials Today Communications 28 (2021) 102725	If the MCNM composition is not noted in the MCNM or information tab, composition is based on the stoichiometry
Gd:ZnO (3%)	Gd doped on ZnO nanorods(3%)	83.28	134	24 h	growth inhibition assay	IC50	>1000	>0.0120076849183477	Acinetobacter baumannii	Bacteria	-	Satpathy et al., Materials Today Communications 28 (2021) 102725	If the MCNM composition is not noted in the MCNM or information tab, composition is based on the stoichiometry
Gd:ZnO (5%)	Gd doped on ZnO nanorods(5%)	84.8	134	24 h	growth inhibition assay	IC50	>1000	>0.0117924528301887	Acinetobacter baumannii	Bacteria	-	Satpathy et al., Materials Today Communications 28 (2021) 102725	If the MCNM composition is not noted in the MCNM or information tab, composition is based on the stoichiometry
Gd:ZnO (1%)	Gd doped on ZnO nanorods(1%)	81.76	134	24 h	growth inhibition assay	IC50	>1000	>0.0122309197651663	P. aureginosa	Bacteria	-	Satpathy et al., Materials Today Communications 28 (2021) 102725	If the MCNM composition is not noted in the MCNM or information tab, composition is based on the stoichiometry
Gd:ZnO (3%)	Gd doped on ZnO nanorods(3%)	83.28	134	24 h	growth inhibition assay	IC50	>1000	>0.0120076849183477	P. aureginosa	Bacteria	-	Satpathy et al., Materials Today Communications 28 (2021) 102725	If the MCNM composition is not noted in the MCNM or information tab, composition is based on the stoichiometry
Gd:ZnO (5%)	Gd doped on ZnO nanorods(5%)	84.8	134	24 h	growth inhibition assay	IC50	>1000	>0.0117924528301887	P. aureginosa	Bacteria	-	Satpathy et al., Materials Today Communications 28 (2021) 102725	If the MCNM composition is not noted in the MCNM or information tab, composition is based on the stoichiometry
Gd:ZnO (1%)	Gd doped on ZnO nanorods(1%)	81.76	134	24 h	growth inhibition assay	IC50	>1000	>0.0122309197651663	S. enterica	Bacteria	-	Satpathy et al., Materials Today Communications 28 (2021) 102725	If the MCNM composition is not noted in the MCNM or information tab, composition is based on the stoichiometry
Gd:ZnO (3%)	Gd doped on ZnO nanorods(3%)	83.28	134	24 h	growth inhibition assay	IC50	>1000	>0.0120076849183477	S. enterica	Bacteria	-	Satpathy et al., Materials Today Communications 28 (2021) 102725	If the MCNM composition is not noted in the MCNM or information tab, composition is based on the stoichiometry
Gd:ZnO (5%)	Gd doped on ZnO nanorods(5%)	84.8	134	24 h	growth inhibition assay	IC50	>1000	>0.0117924528301887	S. enterica	Bacteria	-	Satpathy et al., Materials Today Communications 28 (2021) 102725	If the MCNM composition is not noted in the MCNM or information tab, composition is based on the stoichiometry
Gd:ZnO (1%)	Gd doped on ZnO nanorods(1%)	81.76	134	16 h	Movement inhibition	IC50	100	0.00122309	C.elegans	Eukaryotes	-2.91254	Satpathy et al., Materials Today Communications 28 (2021) 102725	If the MCNM composition is not noted in the MCNM or information tab, composition is based on the stoichiometry
Gd:ZnO (3%)	Gd doped on ZnO nanorods(3%)	83.28	134	16 h	Movement inhibition	IC50	>100	>0.00120076849183477	C.elegans	Eukaryotes	-	Satpathy et al., Materials Today Communications 28 (2021) 102725	If the MCNM composition is not noted in the MCNM or information tab, composition is based on the stoichiometry
Gd:ZnO (5%)	Gd doped on ZnO nanorods(5%)	84.8	134	16 h	Movement inhibition	IC50	>100	>0.00117924528301887	C.elegans	Eukaryotes	-	Satpathy et al., Materials Today Communications 28 (2021) 102725	If the MCNM composition is not noted in the MCNM or information tab, composition is based on the stoichiometry
Gd:ZnO (1%)	Gd doped on ZnO nanorods(1%)	81.76	134	40 h	Movement inhibition	IC50	100	0.00122309	Danio rerio	Fish	-2.91254	Satpathy et al., Materials Today Communications 28 (2021) 102725	If the MCNM composition is not noted in the MCNM or information tab, composition is based on the stoichiometry
Gd:ZnO (3%)	Gd doped on ZnO nanorods(3%)	83.28	134	40 h	Movement inhibition	IC50	>100	>0.00120076849183477	Danio rerio	Fish	-	Satpathy et al., Materials Today Communications 28 (2021) 102725	If the MCNM composition is not noted in the MCNM or information tab, composition is based on the stoichiometry
Gd:ZnO (5%)	Gd doped on ZnO nanorods(5%)	84.8	134	40 h	Movement inhibition	IC50	>100	>0.00117924528301887	Danio rerio	Fish	-	Satpathy et al., Materials Today Communications 28 (2021) 102725	If the MCNM composition is not noted in the MCNM or information tab, composition is based on the stoichiometry
Al2O3:SiO2:Na2O	Zeolite(23%Al, 44%SiO2,33%Na2O)	70.32	<2μm	24 h	Mortality assay	LC50	>10000	>0.142207053469852	A. salina	Crustacean	-	Savi et al., Mater. Res. Express 4 (2017) 085401	If the MCNM composition is not noted in the MCNM or information tab, composition is based on the stoichiometry
Al2O3:SiO2:Na2O	Zeolite(23%Al, 44%SiO2,33%Na2O)	70.32	<2μm	24 h	growth inhibition assay	IC50	>1000	>0.0142207053469852	A. flavus	Eukaryotes	-	Savi et al., Mater. Res. Express 4 (2017) 085401	If the MCNM composition is not noted in the MCNM or information tab, composition is based on the stoichiometry
Al2O3:SiO2:Na2O:CuO	Zeolite(22%Al, 43%SiO2,7%Na2O, 28%CuO)	74.84	<2μm	24 h	Mortality assay	LC50	>10000	>0.133618385889898	A. salina	Crustacean	-	Savi et al., Mater. Res. Express 4 (2017) 085402	If the MCNM composition is not noted in the MCNM or information tab, composition is based on the stoichiometry
Al2O3:SiO2:Na2O:CuO	Zeolite(22%Al, 43%SiO2,7%Na2O, 28%CuO)	74.84	<2μm	24 h	growth inhibition assay	IC50	>1000	>0.0133618385889898	A. flavus	Eukaryotes	-	Savi et al., Mater. Res. Express 4 (2017) 085402	If the MCNM composition is not noted in the MCNM or information tab, composition is based on the stoichiometry
Al2O3:SiO2:Na2O:ZnO	Zeolite(20%Al, 44%SiO2,15%Na2O, 21%ZnO)	72.9	<2μm	24 h	Mortality assay	LC50	>10000	>0.137174211248285	A. salina	Crustacean	-	Savi et al., Mater. Res. Express 4 (2017) 085403	If the MCNM composition is not noted in the MCNM or information tab, composition is based on the stoichiometry
Al2O3:SiO2:Na2O:ZnO	Zeolite(20%Al, 44%SiO2,15%Na2O, 21%ZnO)	72.9	<2μm	24 h	growth inhibition assay	IC50	>1000	>0.0137174211248285	A. flavus	Eukaryotes	-	Savi et al., Mater. Res. Express 4 (2017) 085403	If the MCNM composition is not noted in the MCNM or information tab, composition is based on the stoichiometry
Al2O3:SiO2:Na2O:Co2O3	Zeolite(24%Al, 50%SiO2,6%Na2O, 20%Co2O3)	91.4	<2μm	24 h	Mortality assay	LC50	>10000	>0.109409190371991	A. salina	Crustacean	-	Savi et al., Mater. Res. Express 4 (2017) 085404	If the MCNM composition is not noted in the MCNM or information tab, composition is based on the stoichiometry
Al2O3:SiO2:Na2O:Co2O3	Zeolite(24%Al, 50%SiO2,6%Na2O, 20%Co2O3)	91.4	<2μm	24 h	growth inhibition assay	IC50	>1000	>0.0109409190371991	A. flavus	Eukaryotes	-	Savi et al., Mater. Res. Express 4 (2017) 085404	If the MCNM composition is not noted in the MCNM or information tab, composition is based on the stoichiometry
Al2O3:SiO2:Na2O:Li2O	Zeolite(22%Al, 44%SiO2,4%Na2O, 36%Li2O)	62.12	<2μm	24 h	Mortality assay	LC50	4400	0.0708307	A. salina	Crustacean	-1.14978	Savi et al., Mater. Res. Express 4 (2017) 085405	If the MCNM composition is not noted in the MCNM or information tab, composition is based on the stoichiometry
Al2O3:SiO2:Na2O:Li2O	Zeolite(22%Al, 44%SiO2,4%Na2O, 36%Li2O)	62.12	<2μm	24 h	growth inhibition assay	IC50	500	0.00804894	A. flavus	Eukaryotes	-2.09426	Savi et al., Mater. Res. Express 4 (2017) 085405	If the MCNM composition is not noted in the MCNM or information tab, composition is based on the stoichiometry
Fe-ZnO	ZnO doped with Fe 20%	76	54	12 h	bactericidal assay	IC50	0.24	3.15789e-06	E. Coli	Bacteria	-5.5006	Saxena and Pandey, Journal of Trace Elements in Medicine and Biology 57 (2020) 134–145	If the MCNM composition is not noted in the MCNM or information tab, composition is based on the stoichiometry
Fe-ZnO	ZnO doped with Fe 15%	77.25	53	12 h	bactericidal assay	IC50	0.2	2.589e-06	E. Coli	Bacteria	-5.58687	Saxena and Pandey, Journal of Trace Elements in Medicine and Biology 57 (2020) 134–145	If the MCNM composition is not noted in the MCNM or information tab, composition is based on the stoichiometry
Fe-ZnO	ZnO doped with Fe 10%	78.5	54	12 h	bactericidal assay	IC50	0.25	3.18471e-06	E. Coli	Bacteria	-5.49693	Saxena and Pandey, Journal of Trace Elements in Medicine and Biology 57 (2020) 134–145	If the MCNM composition is not noted in the MCNM or information tab, composition is based on the stoichiometry
Fe-ZnO	ZnO doped with Fe 5%	79.75	33	12 h	bactericidal assay	IC50	0.28	3.51097e-06	E. Coli	Bacteria	-5.45457	Saxena and Pandey, Journal of Trace Elements in Medicine and Biology 57 (2020) 134–145	If the MCNM composition is not noted in the MCNM or information tab, composition is based on the stoichiometry
Fe-ZnO	ZnO doped with Fe 20%	76	54	12 h	bactericidal assay	IC50	0.24	3.15789e-06	E. hirae	Bacteria	-5.5006	Saxena and Pandey, Journal of Trace Elements in Medicine and Biology 57 (2020) 134–145	If the MCNM composition is not noted in the MCNM or information tab, composition is based on the stoichiometry
Fe-ZnO	ZnO doped with Fe 15%	77.25	53	12 h	bactericidal assay	IC50	0.16	2.0712e-06	E. hirae	Bacteria	-5.68378	Saxena and Pandey, Journal of Trace Elements in Medicine and Biology 57 (2020) 134–145	If the MCNM composition is not noted in the MCNM or information tab, composition is based on the stoichiometry
Fe-ZnO	ZnO doped with Fe 10%	78.5	54	12 h	bactericidal assay	IC50	0.26	3.3121e-06	E. hirae	Bacteria	-5.4799	Saxena and Pandey, Journal of Trace Elements in Medicine and Biology 57 (2020) 134–145	If the MCNM composition is not noted in the MCNM or information tab, composition is based on the stoichiometry
Fe-ZnO	ZnO doped with Fe 5%	79.75	33	12 h	bactericidal assay	IC50	0.27	3.38558e-06	E. hirae	Bacteria	-5.47037	Saxena and Pandey, Journal of Trace Elements in Medicine and Biology 57 (2020) 134–145	If the MCNM composition is not noted in the MCNM or information tab, composition is based on the stoichiometry
Fe-ZnO	ZnO doped with Fe 20%	76	54	12 h	bactericidal assay	IC50	0.22	2.89474e-06	S. aureus	Bacteria	-5.53839	Saxena and Pandey, Journal of Trace Elements in Medicine and Biology 57 (2020) 134–145	If the MCNM composition is not noted in the MCNM or information tab, composition is based on the stoichiometry
Fe-ZnO	ZnO doped with Fe 15%	77.25	53	12 h	bactericidal assay	IC50	0.2	2.589e-06	S. aureus	Bacteria	-5.58687	Saxena and Pandey, Journal of Trace Elements in Medicine and Biology 57 (2020) 134–145	If the MCNM composition is not noted in the MCNM or information tab, composition is based on the stoichiometry
Fe-ZnO	ZnO doped with Fe 10%	78.5	54	12 h	bactericidal assay	IC50	0.22	2.80255e-06	S. aureus	Bacteria	-5.55245	Saxena and Pandey, Journal of Trace Elements in Medicine and Biology 57 (2020) 134–145	If the MCNM composition is not noted in the MCNM or information tab, composition is based on the stoichiometry
Fe-ZnO	ZnO doped with Fe 5%	79.75	33	12 h	bactericidal assay	IC50	0.24	3.0094e-06	S. aureus	Bacteria	-5.52152	Saxena and Pandey, Journal of Trace Elements in Medicine and Biology 57 (2020) 134–145	If the MCNM composition is not noted in the MCNM or information tab, composition is based on the stoichiometry
Fe-ZnO	ZnO doped with Fe 20%	76	54	12 h	bactericidal assay	IC50	0.22	2.89474e-06	S. paratyphi	Bacteria	-5.53839	Saxena and Pandey, Journal of Trace Elements in Medicine and Biology 57 (2020) 134–145	If the MCNM composition is not noted in the MCNM or information tab, composition is based on the stoichiometry
Fe-ZnO	ZnO doped with Fe 15%	77.25	53	12 h	bactericidal assay	IC50	0.19	2.45955e-06	S. paratyphi	Bacteria	-5.60914	Saxena and Pandey, Journal of Trace Elements in Medicine and Biology 57 (2020) 134–145	If the MCNM composition is not noted in the MCNM or information tab, composition is based on the stoichiometry
Fe-ZnO	ZnO doped with Fe 10%	78.5	54	12 h	bactericidal assay	IC50	0.22	2.80255e-06	S. paratyphi	Bacteria	-5.55245	Saxena and Pandey, Journal of Trace Elements in Medicine and Biology 57 (2020) 134–145	If the MCNM composition is not noted in the MCNM or information tab, composition is based on the stoichiometry
Fe-ZnO	ZnO doped with Fe 5%	79.75	33	12 h	bactericidal assay	IC50	0.24	3.0094e-06	S. paratyphi	Bacteria	-5.52152	Saxena and Pandey, Journal of Trace Elements in Medicine and Biology 57 (2020) 134–145	If the MCNM composition is not noted in the MCNM or information tab, composition is based on the stoichiometry
ZnO:TiO2	ZnO-Doped TiO2 (1%)	80.01	34.21	72 h	Mortality test	LC50	>1000	>0.0124984376952881	Danio rerio	Fish	-	Sezer et al., Chemosphere 325 (2023) 138342	If the MCNM composition is not noted in the MCNM or information tab, composition is based on the stoichiometry
ZnO:TiO2	ZnO-Doped TiO2 (1%)	80.01	34.21	96 h	Mortality test	LC50	>1000	>0.0124984376952881	Danio rerio	Fish	-	Sezer et al., Chemosphere 325 (2023) 138342	If the MCNM composition is not noted in the MCNM or information tab, composition is based on the stoichiometry
ZnO:TiO2	ZnO-Doped TiO2 (1%)	80.01	10.24	72 h	Mortality test	LC50	>1000	>0.0124984376952881	Danio rerio	Fish	-	Sezer et al., Chemosphere 325 (2023) 138343	If the MCNM composition is not noted in the MCNM or information tab, composition is based on the stoichiometry
ZnO:TiO2	ZnO-Doped TiO2 (1%)	80.01	10.24	96 h	Mortality test	LC50	1000	0.0124984	Danio rerio	Fish	-1.90314	Sezer et al., Chemosphere 325 (2023) 138343	If the MCNM composition is not noted in the MCNM or information tab, composition is based on the stoichiometry
ZnO:TiO2	ZnO-Doped TiO2 (1%)	80.01	9.57	72 h	Mortality test	LC50	>1000	>0.0124984376952881	Danio rerio	Fish	-	Sezer et al., Chemosphere 325 (2023) 138344	If the MCNM composition is not noted in the MCNM or information tab, composition is based on the stoichiometry
ZnO:TiO2	ZnO-Doped TiO2 (1%)	80.01	9.57	96 h	Mortality test	LC50	>1000	>0.0124984376952881	Danio rerio	Fish	-	Sezer et al., Chemosphere 325 (2023) 138344	If the MCNM composition is not noted in the MCNM or information tab, composition is based on the stoichiometry
ZnO:TiO2	ZnO-Doped TiO2 (1%)	80.01	39.06	72 h	Mortality test	LC50	>1000	>0.0124984376952881	Danio rerio	Fish	-	Sezer et al., Chemosphere 325 (2023) 138345	If the MCNM composition is not noted in the MCNM or information tab, composition is based on the stoichiometry
ZnO:TiO2	ZnO-Doped TiO2 (1%)	80.01	39.06	96 h	Mortality test	LC50	>1000	>0.0124984376952881	Danio rerio	Fish	-	Sezer et al., Chemosphere 325 (2023) 138345	If the MCNM composition is not noted in the MCNM or information tab, composition is based on the stoichiometry
Al:ZnO	Al doped ZnO(1%)	80.46	35	24 h	Seed germination	EC50	>10000	>0.124285359184688	Vigna radiata	Plants	-	Shi et al., NANO: Brief Reports and Reviews Vol. 5, No. 4 (2010) 215–220	If the MCNM composition is not noted in the MCNM or information tab, composition is based on the stoichiometry
Al:ZnO	Al doped ZnO(1%)	80.46	35	48 h	Root elongation	EC50	10000	0.124285	Vigna radiata	Plants	-0.90558	Shi et al., NANO: Brief Reports and Reviews Vol. 5, No. 4 (2010) 215–220	If the MCNM composition is not noted in the MCNM or information tab, composition is based on the stoichiometry
WO3:ZnO:ZnWO4	Composite (34%WO3, 45%ZnO,21%ZnWO4)	148.195	269.3	24 h	MFC assay	IC50	2048	0.0138196	R. mucilaginosa	Eukaryotes	-1.8595	Shyuan ET AL., IOSR Journal of Engineering (IOSRJEN).Vol. 10, Issue 4, April 2020, ||Series -I|| PP 44-57	If the MCNM composition is not noted in the MCNM or information tab, composition is based on the stoichiometry
WO3:ZnO:ZnWO4	Composite (35%WO3, 42%ZnO,23%ZnWO4)	151.215	239.76	24 h	MFC assay	IC50	1024	0.00677181	R. mucilaginosa	Eukaryotes	-2.16929	Shyuan ET AL., IOSR Journal of Engineering (IOSRJEN).Vol. 10, Issue 4, April 2020, ||Series -I|| PP 44-57	If the MCNM composition is not noted in the MCNM or information tab, composition is based on the stoichiometry
WO3:ZnO:ZnWO4	Composite (27%WO3, 55%ZnO,18%ZnWO4)	135.36	239.48	24 h	MFC assay	IC50	1024	0.00756501	R. mucilaginosa	Eukaryotes	-2.12119	Shyuan ET AL., IOSR Journal of Engineering (IOSRJEN).Vol. 10, Issue 4, April 2020, ||Series -I|| PP 44-57	If the MCNM composition is not noted in the MCNM or information tab, composition is based on the stoichiometry
ZnO:MgO	Zn doped MgO (9.6%)	43.936	52	48 h	growth inhibition assay	IC50	1250	0.0284505	Aspergillus niger	Eukaryotes	-1.54591	Sierra-Fernandez et al., ACS Appl. Mater. Interfaces2017, 9, 24873−24886	If the MCNM composition is not noted in the MCNM or information tab, composition is based on the stoichiometry
ZnO:MgO	Zn doped MgO (9.6%)	43.936	52	48 h	growth inhibition assay	IC50	625	0.0142252	Penicillinum oxalicum	Eukaryotes	-1.84694	Sierra-Fernandez et al., ACS Appl. Mater. Interfaces2017, 9, 24873−24886	If the MCNM composition is not noted in the MCNM or information tab, composition is based on the stoichiometry
ZnO:MgO	Zn doped MgO (9.6%)	43.936	52	48 h	growth inhibition assay	IC50	1250	0.0284505	Paraconiothyriumsp.	Eukaryotes	-1.54591	Sierra-Fernandez et al., ACS Appl. Mater. Interfaces2017, 9, 24873−24886	If the MCNM composition is not noted in the MCNM or information tab, composition is based on the stoichiometry
ZnO:MgO	Zn doped MgO (9.6%)	43.936	52	48 h	growth inhibition assay	IC50	5000	0.113802	Pestalotiopsis maculans	Eukaryotes	-0.943851	Sierra-Fernandez et al., ACS Appl. Mater. Interfaces2017, 9, 24873−24886	If the MCNM composition is not noted in the MCNM or information tab, composition is based on the stoichiometry
Ni:CuO(10%)	Ni doped CuO (10%)	79.05	20-40	48 h	growth inhibition assay	IC50		0.000625	Candida kusei	Eukaryotes	-3.20412	Soni et al., Materials Today: Proceedings,2022 (10.1016/j.matpr.2022.09.133)	If the MCNM composition is not noted in the MCNM or information tab, composition is based on the stoichiometry
Co:CuO(10%)	Co doped CuO (10%)	79.05	20-40	48 h	growth inhibition assay	IC50		0.000625	Candida kusei	Eukaryotes	-3.20412	Soni et al., Materials Today: Proceedings,2022 (10.1016/j.matpr.2022.09.133)	If the MCNM composition is not noted in the MCNM or information tab, composition is based on the stoichiometry
Co:CuO(10%)	Co doped CuO (10%)	79.05	20-40	48 h	growth inhibition assay	IC50		0.0003125	Candid albicans	Eukaryotes	-3.50515	Soni et al., Materials Today: Proceedings,2022 (10.1016/j.matpr.2022.09.133)	If the MCNM composition is not noted in the MCNM or information tab, composition is based on the stoichiometry
Ni:CuO(10%)	Ni doped CuO (10%)	79.05	20-40	48 h	growth inhibition assay	IC50		0.0003125	Candida tropicalis	Eukaryotes	-3.50515	Soni et al., Materials Today: Proceedings,2022 (10.1016/j.matpr.2022.09.133)	If the MCNM composition is not noted in the MCNM or information tab, composition is based on the stoichiometry
Co:CuO(10%)	Co doped CuO (10%)	79.05	20-40	48 h	growth inhibition assay	IC50		0.0003125	Candida parapsolsis	Eukaryotes	-3.50515	Soni et al., Materials Today: Proceedings,2022 (10.1016/j.matpr.2022.09.133)	If the MCNM composition is not noted in the MCNM or information tab, composition is based on the stoichiometry
Co:CuO(10%)	Co doped CuO (10%)	79.05	20-40	48 h	growth inhibition assay	IC50		0.000625	Candida kyfer	Eukaryotes	-3.20412	Soni et al., Materials Today: Proceedings,2022 (10.1016/j.matpr.2022.09.133)	If the MCNM composition is not noted in the MCNM or information tab, composition is based on the stoichiometry
Ni:CuO(10%)	Ni doped CuO (10%)	79.05	20-40	48 h	growth inhibition assay	IC50		0.0003125	Candida glabrata	Eukaryotes	-3.50515	Soni et al., Materials Today: Proceedings,2022 (10.1016/j.matpr.2022.09.133)	If the MCNM composition is not noted in the MCNM or information tab, composition is based on the stoichiometry
Co:CuO(10%)	Co doped CuO (10%)	79.05	20-40	48 h	growth inhibition assay	IC50		9.25e-06	Candida glabrata	Eukaryotes	-5.03386	Soni et al., Materials Today: Proceedings,2022 (10.1016/j.matpr.2022.09.133)	If the MCNM composition is not noted in the MCNM or information tab, composition is based on the stoichiometry
Ag:Au	Bimetallic NPs, equal ratio	152.5	50 nm	6 days	growth inhibition assay	IC50	1.23	8.06557e-06	Lupinus angustifolius	Plants	-5.09336	Szymanski et al, (2020)Journal of Inorganic and Organometallic Polymers and Materials https://doi.org/10.1007/s10904-020-01814-0	If the MCNM composition is not noted in the MCNM or information tab, composition is based on the stoichiometry
Ag:Au	Bimetallic NPs, equal ratio	152.5	50 nm	6 days	growth inhibition assay	IC50	0.083	5.44262e-07	Zea mays	Plants	-6.26419	Szymanski et al, (2020)Journal of Inorganic and Organometallic Polymers and Materials https://doi.org/10.1007/s10904-020-01814-0	If the MCNM composition is not noted in the MCNM or information tab, composition is based on the stoichiometry
Ag:Au	Bimetallic NPs, equal ratio	152.5	50 nm	5 days	growth inhibition assay	IC50	0.00983	6.4459e-08	Linum favum	Plants	-7.19072	Szymanski et al, (2020)Journal of Inorganic and Organometallic Polymers and Materials https://doi.org/10.1007/s10904-020-01814-0	If the MCNM composition is not noted in the MCNM or information tab, composition is based on the stoichiometry
Ag:Au	Bimetallic NPs, equal ratio	152.5	50 nm	5 days	growth inhibition assay	IC50	0.0245	1.60656e-07	Salvia hispanica	Plants	-6.7941	Szymanski et al, (2020)Journal of Inorganic and Organometallic Polymers and Materials https://doi.org/10.1007/s10904-020-01814-0	If the MCNM composition is not noted in the MCNM or information tab, composition is based on the stoichiometry
Ag:Au	Bimetallic NPs, equal ratio	152.5	50 nm	6 days	growth inhibition assay	IC50	0.0549	3.6e-07	Solanum lycopersicum	Plants	-6.4437	Szymanski et al, (2020)Journal of Inorganic and Organometallic Polymers and Materials https://doi.org/10.1007/s10904-020-01814-0	If the MCNM composition is not noted in the MCNM or information tab, composition is based on the stoichiometry
Ag:Au	Bimetallic NPs, equal ratio	152.5	50 nm	5 days	growth inhibition assay	IC50	0.0206	1.35082e-07	Lepidium sativum	Plants	-6.8694	Szymanski et al, (2020)Journal of Inorganic and Organometallic Polymers and Materials https://doi.org/10.1007/s10904-020-01814-0	If the MCNM composition is not noted in the MCNM or information tab, composition is based on the stoichiometry
Au:ZnO	Bimetallic NPs, equal ratio	139	7	5 days	growth inhibition assay	IC50	21.6	0.000155396	Lupinus angustifolius	Plants	-3.80856	Szymanski et al, Journal of Inorganic and Organometallic Polymers and Materials (2022) 32:1354–1369	If the MCNM composition is not noted in the MCNM or information tab, composition is based on the stoichiometry
Au:ZnO	Bimetallic NPs, equal ratio	139	7	6 days	growth inhibition assay	IC50	243	0.0017482	Zea mays	Plants	-2.75741	Szymanski et al, Journal of Inorganic and Organometallic Polymers and Materials (2022) 32:1354–1369	If the MCNM composition is not noted in the MCNM or information tab, composition is based on the stoichiometry
Au:ZnO	Bimetallic NPs, equal ratio	139	7	6 days	growth inhibition assay	IC50	22.8	0.000164029	Linum favum	Plants	-3.78508	Szymanski et al, Journal of Inorganic and Organometallic Polymers and Materials (2022) 32:1354–1369	If the MCNM composition is not noted in the MCNM or information tab, composition is based on the stoichiometry
Au:ZnO	Bimetallic NPs, equal ratio	139	7	5 days	growth inhibition assay	IC50	15.6	0.00011223	Salvia hispanica	Plants	-3.94989	Szymanski et al, Journal of Inorganic and Organometallic Polymers and Materials (2022) 32:1354–1369	If the MCNM composition is not noted in the MCNM or information tab, composition is based on the stoichiometry
Au:ZnO	Bimetallic NPs, equal ratio	139	7	7 days	growth inhibition assay	IC50	51	0.000366906	Beta vulgaris	Plants	-3.43544	Szymanski et al, Journal of Inorganic and Organometallic Polymers and Materials (2022) 32:1354–1369	If the MCNM composition is not noted in the MCNM or information tab, composition is based on the stoichiometry
Au:ZnO	Bimetallic NPs, equal ratio	139	7	5 days	growth inhibition assay	IC50	19.8	0.000142446	Lepidium sativum	Plants	-3.84635	Szymanski et al, Journal of Inorganic and Organometallic Polymers and Materials (2022) 32:1354–1369	If the MCNM composition is not noted in the MCNM or information tab, composition is based on the stoichiometry
Au:ZnO	Bimetallic NPs, equal ratio	139	7	6 days	growth inhibition assay	IC50	54	0.000388489	Phaseolus vulgaris	Plants	-3.41062	Szymanski et al, Journal of Inorganic and Organometallic Polymers and Materials (2022) 32:1354–1369	If the MCNM composition is not noted in the MCNM or information tab, composition is based on the stoichiometry
Au:ZnO	Bimetallic NPs, equal ratio	139	7	11 days	growth inhibition assay	IC50	15.3	0.000110072	Petroselinum crispum	Plants	-3.95832	Szymanski et al, Journal of Inorganic and Organometallic Polymers and Materials (2022) 32:1354–1369	If the MCNM composition is not noted in the MCNM or information tab, composition is based on the stoichiometry
Al2O3:SiO2	composite: SiO2 66.66% mol	74	126	72 h	Root length	EC50	>1000	>0.0135135135135135	Sinapis alba L	Plants	-	Tokarský et al., Environ Sci Pollut Res (2019) 26:22069–22081	If the MCNM composition is not noted in the MCNM or information tab, composition is based on the stoichiometry
Al2O3:SiO2:ZnO (10% wt)	composite: doped with ZnO on surface (10%wt,9.2% mol)	74.644	126	72 h	Root length	EC50	10	0.000133969	Sinapis alba L	Plants	-3.87299	Tokarský et al., Environ Sci Pollut Res (2019) 26:22069–22081	If the MCNM composition is not noted in the MCNM or information tab, composition is based on the stoichiometry
Al2O3:SiO2:ZnO (30%wt)	composite: doped with ZnO on surface (30%wt,28.1% mol)	75.967	126	72 h	Root length	EC50	100	0.00131636	Sinapis alba L	Plants	-2.88062	Tokarský et al., Environ Sci Pollut Res (2019) 26:22069–22081	If the MCNM composition is not noted in the MCNM or information tab, composition is based on the stoichiometry
Al2O3:SiO2:ZnO (50%wt)	composite: doped with ZnO on surface (50%wt,47.7% mol)	77.339	126	72 h	Root length	EC50	10	0.000129301	Sinapis alba L	Plants	-3.8884	Tokarský et al., Environ Sci Pollut Res (2019) 26:22069–22081	If the MCNM composition is not noted in the MCNM or information tab, composition is based on the stoichiometry
Er:ZnO	Er doped ZnO (2.36%)	83.0296	20-40	8 days	Frond number	EC50	50	0.000602195	Lemna minor L	Plants	-3.22026	Torbati et al., (2017)Turkish Journal of Biology: Vol. 41: No. 4, Article 2.	If the MCNM composition is not noted in the MCNM or information tab, composition is based on the stoichiometry
Er:ZnO	Er doped ZnO (2.36%)	83.0296	20-40	12 days	Frond number	EC50	50	0.000602195	Lemna minor L	Plants	-3.22026	Torbati et al., (2017)Turkish Journal of Biology: Vol. 41: No. 4, Article 2.	If the MCNM composition is not noted in the MCNM or information tab, composition is based on the stoichiometry
Er:ZnO	Er doped ZnO (2.36%)	83.0296	20-40	16 days	Frond number	EC50	50	0.000602195	Lemna minor L	Plants	-3.22026	Torbati et al., (2017)Turkish Journal of Biology: Vol. 41: No. 4, Article 2.	If the MCNM composition is not noted in the MCNM or information tab, composition is based on the stoichiometry
Er:ZnO	Er doped ZnO (2.36%)	83.0296	20-40	20 days	Frond number	EC50	50	0.000602195	Lemna minor L	Plants	-3.22026	Torbati et al., (2017)Turkish Journal of Biology: Vol. 41: No. 4, Article 2.	If the MCNM composition is not noted in the MCNM or information tab, composition is based on the stoichiometry
Er:ZnO	Er doped ZnO (2.36%)	83.0296	20-40	20 days	Relative growth rate	EC50	50	0.000602195	Lemna minor L	Plants	-3.22026	Torbati et al., (2017)Turkish Journal of Biology: Vol. 41: No. 4, Article 2.	If the MCNM composition is not noted in the MCNM or information tab, composition is based on the stoichiometry
Al:CeO2	Doped CeO2 (10%)	157.5	<20	4 H	Acute toxicity: optical density	LC50	>1000	>0.00634920634920635	E. Coli	Bacteria	-	Tsai et al., Int J Nanomedicine. 2016;11:2531-2543	If the MCNM composition is not noted in the MCNM or information tab, composition is based on the stoichiometry
Cu:CeO2	Doped CeO2 (10%)	161.2	<20	4 H	Acute toxicity: optical density	LC50	>1000	>0.00620347394540943	E. Coli	Bacteria	-	Tsai et al., Int J Nanomedicine. 2016;11:2531-2543	If the MCNM composition is not noted in the MCNM or information tab, composition is based on the stoichiometry
Cr:CeO2	Doped CeO2 (10%)	160	<20	4 H	Acute toxicity: optical density	LC50	>1000	>0.00625	E. Coli	Bacteria	-	Tsai et al., Int J Nanomedicine. 2016;11:2531-2543	If the MCNM composition is not noted in the MCNM or information tab, composition is based on the stoichiometry
Al:CeO2	Doped CeO2 (10%)	157.5	<20	8 h	Acute toxicity: optical density	LC50	>1000	>0.00634920634920635	E. Coli	Bacteria	-	Tsai et al., Int J Nanomedicine. 2016;11:2531-2543	If the MCNM composition is not noted in the MCNM or information tab, composition is based on the stoichiometry
Cu:CeO2	Doped CeO2 (10%)	161.2	<20	8 h	Acute toxicity: optical density	LC50	>1000	>0.00620347394540943	E. Coli	Bacteria	-	Tsai et al., Int J Nanomedicine. 2016;11:2531-2543	If the MCNM composition is not noted in the MCNM or information tab, composition is based on the stoichiometry
Cr:CeO2	Doped CeO2 (10%)	160	<20	8 h	Acute toxicity: optical density	LC50	>1000	>0.00625	E. Coli	Bacteria	-	Tsai et al., Int J Nanomedicine. 2016;11:2531-2543	If the MCNM composition is not noted in the MCNM or information tab, composition is based on the stoichiometry
Al:CeO2	Doped CeO2 (10%)	157.5	<20	12 h	Acute toxicity: optical density	LC50	>1000	>0.00634920634920635	E. Coli	Bacteria	-	Tsai et al., Int J Nanomedicine. 2016;11:2531-2543	If the MCNM composition is not noted in the MCNM or information tab, composition is based on the stoichiometry
Cu:CeO2	Doped CeO2 (10%)	161.2	<20	12 h	Acute toxicity: optical density	LC50	>1000	>0.00620347394540943	E. Coli	Bacteria	-	Tsai et al., Int J Nanomedicine. 2016;11:2531-2543	If the MCNM composition is not noted in the MCNM or information tab, composition is based on the stoichiometry
Cr:CeO2	Doped CeO2 (10%)	160	<20	12 h	Acute toxicity: optical density	LC50	>1000	>0.00625	E. Coli	Bacteria	-	Tsai et al., Int J Nanomedicine. 2016;11:2531-2543	If the MCNM composition is not noted in the MCNM or information tab, composition is based on the stoichiometry
Al:CeO2	Doped CeO2 (10%)	157.5	<20	16 h	Acute toxicity: optical density	LC50	>1000	>0.00634920634920635	E. Coli	Bacteria	-	Tsai et al., Int J Nanomedicine. 2016;11:2531-2543	If the MCNM composition is not noted in the MCNM or information tab, composition is based on the stoichiometry
Cu:CeO2	Doped CeO2 (10%)	161.2	<20	16 h	Acute toxicity: optical density	LC50	>1000	>0.00620347394540943	E. Coli	Bacteria	-	Tsai et al., Int J Nanomedicine. 2016;11:2531-2543	If the MCNM composition is not noted in the MCNM or information tab, composition is based on the stoichiometry
Cr:CeO2	Doped CeO2 (10%)	160	<20	16 h	Acute toxicity: optical density	LC50	>1000	>0.00625	E. Coli	Bacteria	-	Tsai et al., Int J Nanomedicine. 2016;11:2531-2543	If the MCNM composition is not noted in the MCNM or information tab, composition is based on the stoichiometry
Al:CeO2	Doped CeO2 (10%)	157.5	<20	20 h	Acute toxicity: optical density	LC50	>1000	>0.00634920634920635	E. Coli	Bacteria	-	Tsai et al., Int J Nanomedicine. 2016;11:2531-2543	If the MCNM composition is not noted in the MCNM or information tab, composition is based on the stoichiometry
Cu:CeO2	Doped CeO2 (10%)	161.2	<20	20 h	Acute toxicity: optical density	LC50	>1000	>0.00620347394540943	E. Coli	Bacteria	-	Tsai et al., Int J Nanomedicine. 2016;11:2531-2543	If the MCNM composition is not noted in the MCNM or information tab, composition is based on the stoichiometry
Cr:CeO2	Doped CeO2 (10%)	160	<20	20 h	Acute toxicity: optical density	LC50	>1000	>0.00625	E. Coli	Bacteria	-	Tsai et al., Int J Nanomedicine. 2016;11:2531-2543	If the MCNM composition is not noted in the MCNM or information tab, composition is based on the stoichiometry
Al:CeO2	Doped CeO2 (10%)	157.5	<20	24 h	Acute toxicity: optical density	LC50	>1000	>0.00634920634920635	E. Coli	Bacteria	-	Tsai et al., Int J Nanomedicine. 2016;11:2531-2543	If the MCNM composition is not noted in the MCNM or information tab, composition is based on the stoichiometry
Cu:CeO2	Doped CeO2 (10%)	161.2	<20	24 h	Acute toxicity: optical density	LC50	>1000	>0.00620347394540943	E. Coli	Bacteria	-	Tsai et al., Int J Nanomedicine. 2016;11:2531-2543	If the MCNM composition is not noted in the MCNM or information tab, composition is based on the stoichiometry
Cr:CeO2	Doped CeO2 (10%)	160	<20	24 h	Acute toxicity: optical density	LC50	>1000	>0.00625	E. Coli	Bacteria	-	Tsai et al., Int J Nanomedicine. 2016;11:2531-2543	If the MCNM composition is not noted in the MCNM or information tab, composition is based on the stoichiometry
Al:CeO2	Doped CeO2 (10%)	157.5	<20	4 H	Acute toxicity: optical density	LC50	>1000	>0.00634920634920635	S. aureus	Bacteria	-	Tsai et al., Int J Nanomedicine. 2016;11:2531-2543	If the MCNM composition is not noted in the MCNM or information tab, composition is based on the stoichiometry
Cu:CeO2	Doped CeO2 (10%)	161.2	<20	4 H	Acute toxicity: optical density	LC50	>1000	>0.00620347394540943	S. aureus	Bacteria	-	Tsai et al., Int J Nanomedicine. 2016;11:2531-2543	If the MCNM composition is not noted in the MCNM or information tab, composition is based on the stoichiometry
Cr:CeO2	Doped CeO2 (10%)	160	<20	4 H	Acute toxicity: optical density	LC50	>1000	>0.00625	S. aureus	Bacteria	-	Tsai et al., Int J Nanomedicine. 2016;11:2531-2543	If the MCNM composition is not noted in the MCNM or information tab, composition is based on the stoichiometry
Al:CeO2	Doped CeO2 (10%)	157.5	<20	8 h	Acute toxicity: optical density	LC50	>1000	>0.00634920634920635	S. aureus	Bacteria	-	Tsai et al., Int J Nanomedicine. 2016;11:2531-2543	If the MCNM composition is not noted in the MCNM or information tab, composition is based on the stoichiometry
Cu:CeO2	Doped CeO2 (10%)	161.2	<20	8 h	Acute toxicity: optical density	LC50	>1000	>0.00620347394540943	S. aureus	Bacteria	-	Tsai et al., Int J Nanomedicine. 2016;11:2531-2543	If the MCNM composition is not noted in the MCNM or information tab, composition is based on the stoichiometry
Cr:CeO2	Doped CeO2 (10%)	160	<20	8 h	Acute toxicity: optical density	LC50	>1000	>0.00625	S. aureus	Bacteria	-	Tsai et al., Int J Nanomedicine. 2016;11:2531-2543	If the MCNM composition is not noted in the MCNM or information tab, composition is based on the stoichiometry
Al:CeO2	Doped CeO2 (10%)	157.5	<20	12 h	Acute toxicity: optical density	LC50	>1000	>0.00634920634920635	S. aureus	Bacteria	-	Tsai et al., Int J Nanomedicine. 2016;11:2531-2543	If the MCNM composition is not noted in the MCNM or information tab, composition is based on the stoichiometry
Cu:CeO2	Doped CeO2 (10%)	161.2	<20	12 h	Acute toxicity: optical density	LC50	>1000	>0.00620347394540943	S. aureus	Bacteria	-	Tsai et al., Int J Nanomedicine. 2016;11:2531-2543	If the MCNM composition is not noted in the MCNM or information tab, composition is based on the stoichiometry
Cr:CeO2	Doped CeO2 (10%)	160	<20	12 h	Acute toxicity: optical density	LC50	>1000	>0.00625	S. aureus	Bacteria	-	Tsai et al., Int J Nanomedicine. 2016;11:2531-2543	If the MCNM composition is not noted in the MCNM or information tab, composition is based on the stoichiometry
CeO2		172	<20	16 h	Acute toxicity: optical density	LC50	>1000	>0.00581395348837209	S. aureus	Bacteria	-	Tsai et al., Int J Nanomedicine. 2016;11:2531-2543	If the MCNM composition is not noted in the MCNM or information tab, composition is based on the stoichiometry
Al:CeO2	Doped CeO2 (10%)	157.5	<20	16 h	Acute toxicity: optical density	LC50	>1000	>0.00634920634920635	S. aureus	Bacteria	-	Tsai et al., Int J Nanomedicine. 2016;11:2531-2543	If the MCNM composition is not noted in the MCNM or information tab, composition is based on the stoichiometry
Cu:CeO2	Doped CeO2 (10%)	161.2	<20	16 h	Acute toxicity: optical density	LC50	>1000	>0.00620347394540943	S. aureus	Bacteria	-	Tsai et al., Int J Nanomedicine. 2016;11:2531-2543	If the MCNM composition is not noted in the MCNM or information tab, composition is based on the stoichiometry
Cr:CeO2	Doped CeO2 (10%)	160	<20	16 h	Acute toxicity: optical density	LC50	>1000	>0.00625	S. aureus	Bacteria	-	Tsai et al., Int J Nanomedicine. 2016;11:2531-2543	If the MCNM composition is not noted in the MCNM or information tab, composition is based on the stoichiometry
Al:CeO2	Doped CeO2 (10%)	157.5	<20	20 h	Acute toxicity: optical density	LC50	>1000	>0.00634920634920635	S. aureus	Bacteria	-	Tsai et al., Int J Nanomedicine. 2016;11:2531-2543	If the MCNM composition is not noted in the MCNM or information tab, composition is based on the stoichiometry
Cu:CeO2	Doped CeO2 (10%)	161.2	<20	20 h	Acute toxicity: optical density	LC50	>1000	>0.00620347394540943	S. aureus	Bacteria	-	Tsai et al., Int J Nanomedicine. 2016;11:2531-2543	If the MCNM composition is not noted in the MCNM or information tab, composition is based on the stoichiometry
Cr:CeO2	Doped CeO2 (10%)	160	<20	20 h	Acute toxicity: optical density	LC50	>1000	>0.00625	S. aureus	Bacteria	-	Tsai et al., Int J Nanomedicine. 2016;11:2531-2543	If the MCNM composition is not noted in the MCNM or information tab, composition is based on the stoichiometry
Al:CeO2	Doped CeO2 (10%)	157.5	<20	24 h	Acute toxicity: optical density	LC50	>1000	>0.00634920634920635	S. aureus	Bacteria	-	Tsai et al., Int J Nanomedicine. 2016;11:2531-2543	If the MCNM composition is not noted in the MCNM or information tab, composition is based on the stoichiometry
Cu:CeO2	Doped CeO2 (10%)	161.2	<20	24 h	Acute toxicity: optical density	LC50	>1000	>0.00620347394540943	S. aureus	Bacteria	-	Tsai et al., Int J Nanomedicine. 2016;11:2531-2543	If the MCNM composition is not noted in the MCNM or information tab, composition is based on the stoichiometry
Cr:CeO2	Doped CeO2 (10%)	160	<20	24 h	Acute toxicity: optical density	LC50	>1000	>0.00625	S. aureus	Bacteria	-	Tsai et al., Int J Nanomedicine. 2016;11:2531-2543	If the MCNM composition is not noted in the MCNM or information tab, composition is based on the stoichiometry
Ag:CeO2	Doped CeO2 (10%)	165.6	<20	24 h	Acute toxicity: CFU units	LC50	1000	0.00603865	S. aureus	Bacteria	-2.21906	Tsai et al., Int J Nanomedicine. 2016;11:2531-2543	If the MCNM composition is not noted in the MCNM or information tab, composition is based on the stoichiometry
Ag:CeO2	Doped CeO2 (10%)	165.6	<20	24 h	Acute toxicity: CFU units	LC50	250	0.00150966	E. Coli	Bacteria	-2.82112	Tsai et al., Int J Nanomedicine. 2016;11:2531-2543	If the MCNM composition is not noted in the MCNM or information tab, composition is based on the stoichiometry
SiO2-CaO-MgO-CuO	Multimetal oxide 60% SiO2,30% CaO, 7.5% MgO, 2.5 CuO	57.8	5.7	48 h	Acute toxicity	IC50	225	0.00389273	Plasmodium falciparum	Eukaryotes	-2.40975	Tsamesidis et al., J. Xenobiot. 2021, 11, 155–162	If the MCNM composition is not noted in the MCNM or information tab, composition is based on the stoichiometry
SiO2-CaO-MgO	Multimetal oxide 55% SiO2,35% CaO, 10% MgO	56.6	6.28	48 h	Acute toxicity	IC50	200	0.00353357	Plasmodium falciparum	Eukaryotes	-2.45179	Tsamesidis et al., J. Xenobiot. 2021, 11, 155–162	If the MCNM composition is not noted in the MCNM or information tab, composition is based on the stoichiometry
TiO2:Ni	TiO2 coated Ni (15.7% TiO2w, 12.1% mol)	61.541	300	30 min	bioluminescence inhibition	IC50	>500	>0.00812466485757463	Vibrio fischeri	Bacteria	-	Uudeküll et al., Journal of Magnetism and Magnetic Materials 429 (2017) 299–304	If the MCNM composition is not noted in the MCNM or information tab, composition is based on the stoichiometry
TiO2:Ni	TiO2 coated Ni (15.7% TiO2w, 12.1% mol)	61.541	300	24 h	Mortality assay	LC50	521	0.0084659	Thamnocephalus platyurus	Crustacean	-2.07233	Uudeküll et al., Journal of Magnetism and Magnetic Materials 429 (2017) 299–304	If the MCNM composition is not noted in the MCNM or information tab, composition is based on the stoichiometry
TiO2:Ni	TiO2 coated Ni (15.7% TiO2w, 12.1% mol)	61.541	300	24 h	growth inhibition assay	IC50	>1000	>0.0162493297151493	S. cerevisiae	Eukaryotes	-	Uudeküll et al., Journal of Magnetism and Magnetic Materials 429 (2017) 299–304	If the MCNM composition is not noted in the MCNM or information tab, composition is based on the stoichiometry
ZnMgO	MgO w 5% Zn	42.05	-	30 min	growth inhibition assay	IC50	1000	0.0237812	B. subtilis	Bacteria	-1.62377	Vidic et al., J Nanopart Res (2013) 15:1595	If the MCNM composition is not noted in the MCNM or information tab, composition is based on the stoichiometry
ZnMgO	MgO w 5% Zn	42.05	-	1 h	growth inhibition assay	IC50	1000	0.0237812	B. subtilis	Bacteria	-1.62377	Vidic et al., J Nanopart Res (2013) 15:1595	If the MCNM composition is not noted in the MCNM or information tab, composition is based on the stoichiometry
ZnMgO	MgO w 5% Zn	42.05	-	2 h	growth inhibition assay	IC50	1000	0.0237812	B. subtilis	Bacteria	-1.62377	Vidic et al., J Nanopart Res (2013) 15:1595	If the MCNM composition is not noted in the MCNM or information tab, composition is based on the stoichiometry
ZnMgO	MgO w 5% Zn	42.05	-	3 h	growth inhibition assay	IC50	1000	0.0237812	B. subtilis	Bacteria	-1.62377	Vidic et al., J Nanopart Res (2013) 15:1595	If the MCNM composition is not noted in the MCNM or information tab, composition is based on the stoichiometry
ZnMgO	MgO w 5% Zn	42.05	-	4 h	growth inhibition assay	IC50	1000	0.0237812	B. subtilis	Bacteria	-1.62377	Vidic et al., J Nanopart Res (2013) 15:1595	If the MCNM composition is not noted in the MCNM or information tab, composition is based on the stoichiometry
ZnMgO	MgO w 5% Zn	42.05	-	5 h	growth inhibition assay	IC50	1000	0.0237812	B. subtilis	Bacteria	-1.62377	Vidic et al., J Nanopart Res (2013) 15:1595	If the MCNM composition is not noted in the MCNM or information tab, composition is based on the stoichiometry
ZnMgO	MgO w 5% Zn	42.05	-	30 min	growth inhibition assay	IC50	1000	0.0237812	E. Coli	Bacteria	-1.62377	Vidic et al., J Nanopart Res (2013) 15:1595	If the MCNM composition is not noted in the MCNM or information tab, composition is based on the stoichiometry
ZnMgO	MgO w 5% Zn	42.05	-	1 h	growth inhibition assay	IC50	1000	0.0237812	E. Coli	Bacteria	-1.62377	Vidic et al., J Nanopart Res (2013) 15:1595	If the MCNM composition is not noted in the MCNM or information tab, composition is based on the stoichiometry
ZnMgO	MgO w 5% Zn	42.05	-	2 h	growth inhibition assay	IC50	1000	0.0237812	E. Coli	Bacteria	-1.62377	Vidic et al., J Nanopart Res (2013) 15:1595	If the MCNM composition is not noted in the MCNM or information tab, composition is based on the stoichiometry
ZnMgO	MgO w 5% Zn	42.05	-	3 h	growth inhibition assay	IC50	1000	0.0237812	E. Coli	Bacteria	-1.62377	Vidic et al., J Nanopart Res (2013) 15:1595	If the MCNM composition is not noted in the MCNM or information tab, composition is based on the stoichiometry
ZnMgO	MgO w 5% Zn	42.05	-	4 h	growth inhibition assay	IC50	1000	0.0237812	E. Coli	Bacteria	-1.62377	Vidic et al., J Nanopart Res (2013) 15:1595	If the MCNM composition is not noted in the MCNM or information tab, composition is based on the stoichiometry
ZnMgO	MgO w 5% Zn	42.05	-	5 h	growth inhibition assay	IC50	1000	0.0237812	E. Coli	Bacteria	-1.62377	Vidic et al., J Nanopart Res (2013) 15:1595	If the MCNM composition is not noted in the MCNM or information tab, composition is based on the stoichiometry
Ag:TiO2	Ag doped Tio2 (5%)	81.4	-	24 h	growth inhibition assay	IC50	>333	>0.00409090909090909	P. palmivora	Eukaryotes	-	Watoni et al., 2021 J. Phys.: Conf. Ser. 1763 012070	If the MCNM composition is not noted in the MCNM or information tab, composition is based on the stoichiometry
Fe:ZnO	Fe doped ZnO (10%)	78.5	8.3	120 h	Embryo Hatching assay	LC50	15	0.000191083	Danio rerio embryos	Fish	-3.71878	Xia et al., ACS Nano 2011, 5, 2, 1223–1235	If the MCNM composition is not noted in the MCNM or information tab, composition is based on the stoichiometry
Ce:Mn:Fe2O3	Ce and Mn doped Fe2o3(14.3% ce, 14.3% Mn)	161.43	88.2	10 days	Seed germination	EC50	>500	>0.00309731772285201	Triticum aestivum L	Plants	-	Zarinkoob et al., Environ Monit Assess 193, 800 (2021).	If the MCNM composition is not noted in the MCNM or information tab, composition is based on the stoichiometry
Ce:Mn:Fe2O3	Ce and Mn doped Fe2o3(14.3% ce, 14.3% Mn)	161.43	88.2	10 days	Root Length	EC50	>500	>0.00309731772285201	Triticum aestivum L	Plants	-	Zarinkoob et al., Environ Monit Assess 193, 800 (2021).	If the MCNM composition is not noted in the MCNM or information tab, composition is based on the stoichiometry
Ce:Mn:Fe2O3	Ce and Mn doped Fe2o3(14.3% ce, 14.3% Mn)	161.43	88.2	10 days	Shoot length	EC50	>500	>0.00309731772285201	Triticum aestivum L	Plants	-	Zarinkoob et al., Environ Monit Assess 193, 800 (2021).	If the MCNM composition is not noted in the MCNM or information tab, composition is based on the stoichiometry
LaCoO3	Doped rare earth oxides	246	-	48 h	Acute toxicity assay	LC50	42.7	0.000173577	Daphnia magna	Crustacean	-3.76051	Zhou et al., Environ. Sci.: Nano, 2018,5, 708-719	If the MCNM composition is not noted in the MCNM or information tab, composition is based on the stoichiometry
